# Supplementary material for: Cobalt-catalysed CH-alkylation of indoles with alcohols by borrowing hydrogen methodology
Source: Royal Society of Chemistry journal article supplement (doi:10.1039/d2gc00469k), 2022-01-01

## Supporting information

# Cobalt-catalysed CH-alkylation of indoles with alcohols by borrowing hydrogen methodology

Bei Zhou,<sup>a</sup> Zhuang Ma,<sup>a</sup> Asma M. Alenad,<sup>b</sup> Carsten Kreyenschulte,<sup>a</sup> Stephan Bartling,<sup>a</sup> Matthias Beller\*<sup>a</sup> Rajenahally V. Jagadeesh\*<sup>a</sup>

<sup>a</sup> Leibniz-Institut für Katalyse e.V., Albert-Einstein-Str. 29a, Rostock, D-18059, Germany.

<sup>b</sup> Chemistry Department, College of Science, Jouf University, P.O. Box: 2014, Sakaka, Kingdom of Saudi Arabia

\*Corresponding authors

E-Mails: [matthias.beller@catalysis.de](mailto:matthias.beller@catalysis.de) ; [jagadeesh.rajenahally@catalysis.de](mailto:jagadeesh.rajenahally@catalysis.de)

## Table of contents

S1. Materials and methods

S2. Procedure for the preparation of catalysts

S3. Characterization of catalysts

S4. General procedure for C3-alkylation of indoles with alcohols

S5. Procedure for catalyst recycling

S6. NMR data

S7. NMR spectra

## **S1. Materials and methods**

All indoles and alcohols were obtained commercially from various chemical companies. Unless otherwise stated all reagents were used directly without purification. Cobalt(II) nitrate hexahydrate (cat no. 239267-100G;  $\geq 98\%$ ), zinc nitrate hexahydrate (cat no. 228737-500G; 98%) and silica suspension (Silica LUDOX® HS-40 colloidal silica, cat no. 420816-1L; 40 wt. % suspension in H<sub>2</sub>O) were purchased from Sigma Aldrich. 2,6-Diaminopyridine (cat no. A12295 -100G) was purchased from Alfa Aesar. The pyrolysis experiments were carried out in Dekema Austromat 624 oven.

XRD powder patterns were recorded on a Panalytical X'Pert diffractometer equipped with a Xcelerator detector using automatic divergence slits and Cu  $\text{K}\alpha_1/\alpha_2$  radiation (40 kV, 40 mA;  $\lambda = 0.15406$  nm,  $0.154443$  nm). Cu beta-radiation was excluded using a nickel filter foil. The measurements were performed in  $0.0167^\circ$  steps and 100 s of data collecting time per step. The samples were mounted on silicon zero background holders. The obtained intensities were converted from automatic to fixed divergence slits ( $0.25^\circ$ ) for further analysis. Peak positions and profiles were fitted with Pseudo-Voigt function using the High Score Plus software package (Panalytical). Phase identification was done by using the PDF-2 database of the International Center of Diffraction Data (ICDD).

Scanning Transmission Electron Microscopy (STEM) was performed with a probe aberration corrected JEM-ARM 200F (JEOL) equipped with high angle annular dark field (HAADF) and annular bright field (ABF) detectors and energy dispersive x-ray spectroscopy (EDXS), Dry60SGD (JEOL), for chemical analysis. Attached to the microscope is an electron energy loss spectrometer (EELS), Enfinium ER (Gatan). The specimen was dry deposited onto a Cu grid (mesh 300) covered by a holey carbon film.

The XPS (X-ray Photoelectron Spectroscopy) measurements were performed on an ESCALAB 220iXL (Thermo Fisher Scientific) with monochromated Al  $\text{K}\alpha$  radiation ( $E = 1486.6$  eV). Samples are prepared on a stainless-steel holder with conductive double-sided adhesive carbon tape. The electron binding energies were obtained without charge compensation leading to a binding energy of 284.7 eV of the main C 1s core level. For quantitative analysis the peaks were deconvoluted with Gaussian-Lorentzian curves using the software Unifit 2021. The peak areas were normalized by the transmission function of the spectrometer and the element specific sensitivity factor of Scofield.

GC and GC-MS analysis were performed on Agilent 6890N instrument. GC conversion and yields were determined by GC-FID, HP6890 chromatograph with FID detector, column HP530 m x 250 mm x  $0.25\ \mu\text{m}$ . NMR spectra were recorded using Bruker 300 Fourier, Bruker AV 300 and Bruker AV 400 spectrometers. Chemical shifts are reported in ppm relative to the deuterated solvent. Coupling constants are expressed in Hertz (Hz). The following abbreviations are used: s = singlet, d = doublet, t = triplet and m = multiple. The residual solvent signals were used as references for  $^1\text{H}$  and  $^{13}\text{C}$  NMR spectra (CDCl<sub>3</sub>:  $\delta\text{H} = 7.26$  ppm,  $\delta\text{C} = 77.12$  ppm; DMSO-d<sub>6</sub>:  $\delta\text{H} = 2.50$  ppm,  $\delta\text{C} = 39.52$  ppm).

All catalytic experiments were carried out in ACS pressure tubes.

## **S2 Procedure for the preparation of catalysts**

In a 100 mL oven-dried single-necked round-bottom flask, 1.20 g colloidal silica aqueous solution (Ludox HS-40, 40 wt. % suspension in H<sub>2</sub>O) was dissolved in 30 mL deionized water and stirred for 30 minutes at room temperature. To the above solution, Co(NO<sub>3</sub>)<sub>2</sub>·6H<sub>2</sub>O (291.03 mg, 2,6-diaminopyridine (DAP; 1636.95 mg) and Zn(NO<sub>3</sub>)<sub>2</sub>·6H<sub>2</sub>O ( 297.49 mg) were added and continued stirring for 20 hours at room temperature. Then, the solvent of the reaction mixture was removed by freeze dryer. The obtained solid material was ground to a fine powder, transferred to a ceramic crucible, and placed in a pyrolysis oven. Afterward, the furnace was heated to the defined temperature (700 °C, 800 °C, and 900 °C) for 3 h at the heating rate of 5 °C/min under argon atmosphere. After the pyrolysis, the oven was cooled down to room temperature and the material was removed from the oven. Next, the obtained samples were etched in 5 M NH<sub>4</sub>HF<sub>2</sub> aqueous solution at RT for 24 h to remove the SiO<sub>2</sub> template and larger particles. Finally, the resulting catalytic material was filtered and washed subsequently with deionized water and ethanol for three times and finally dried under vacuum overnight.

## **S3 Characterization of catalysts**

### XRD patterns

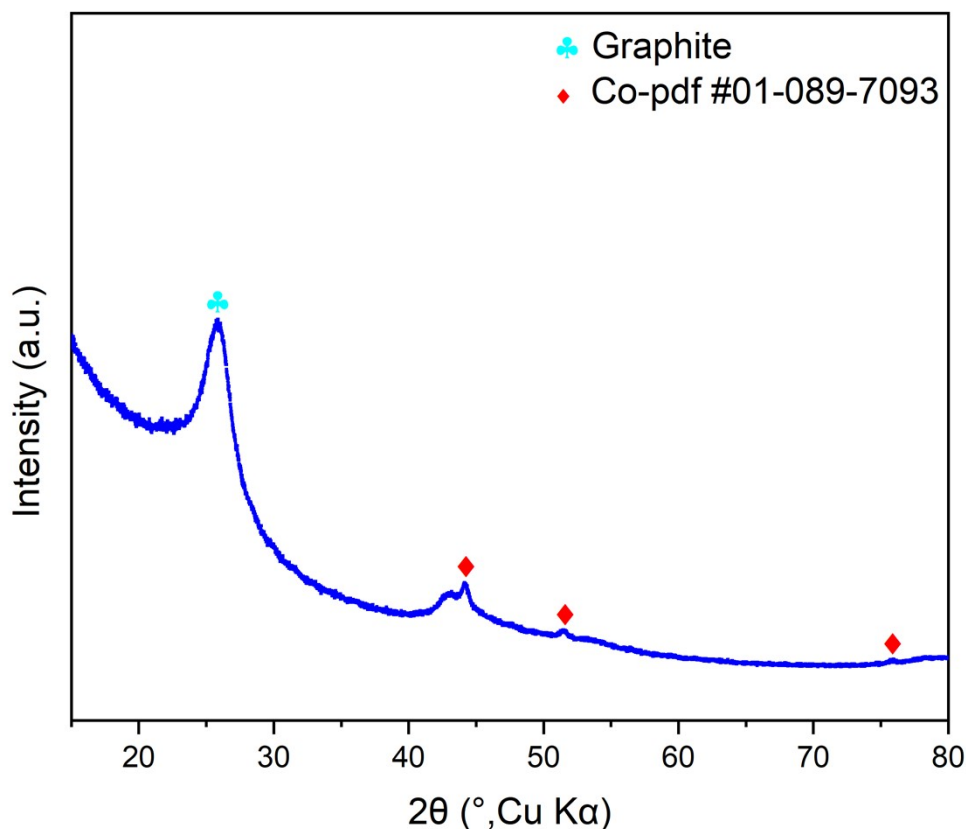

**Fig. S1.** XRD pattern of Co@NC-900 catalyst.

*STEM images*

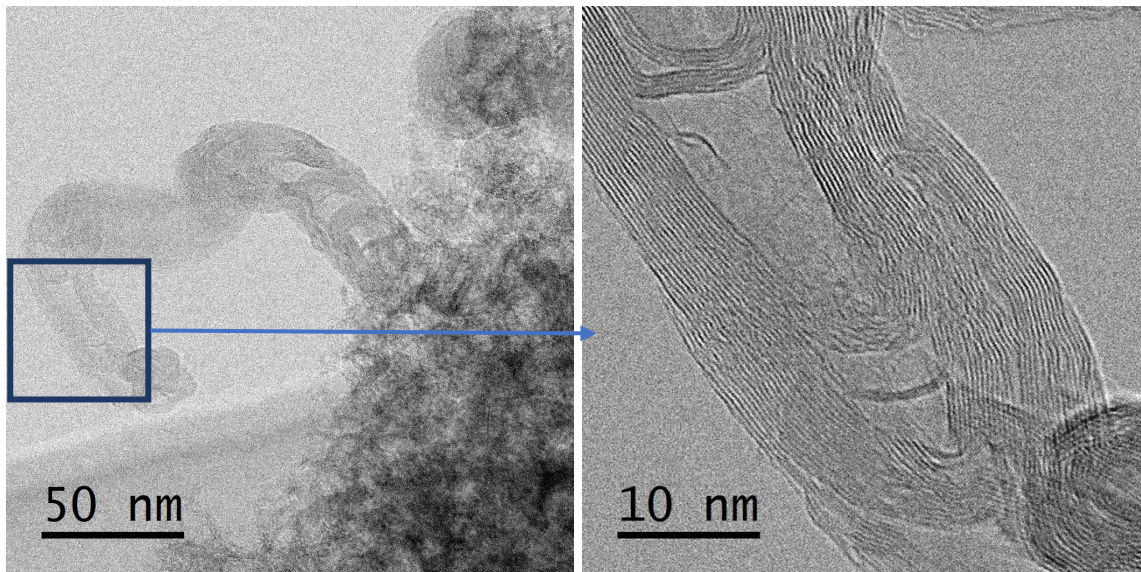

**Fig. S2.** ABF-STEM images of Co@NC-900 catalyst showing highly ordered graphitic carbon in the form of a carbon nano tube attached to a disordered carbon phase.

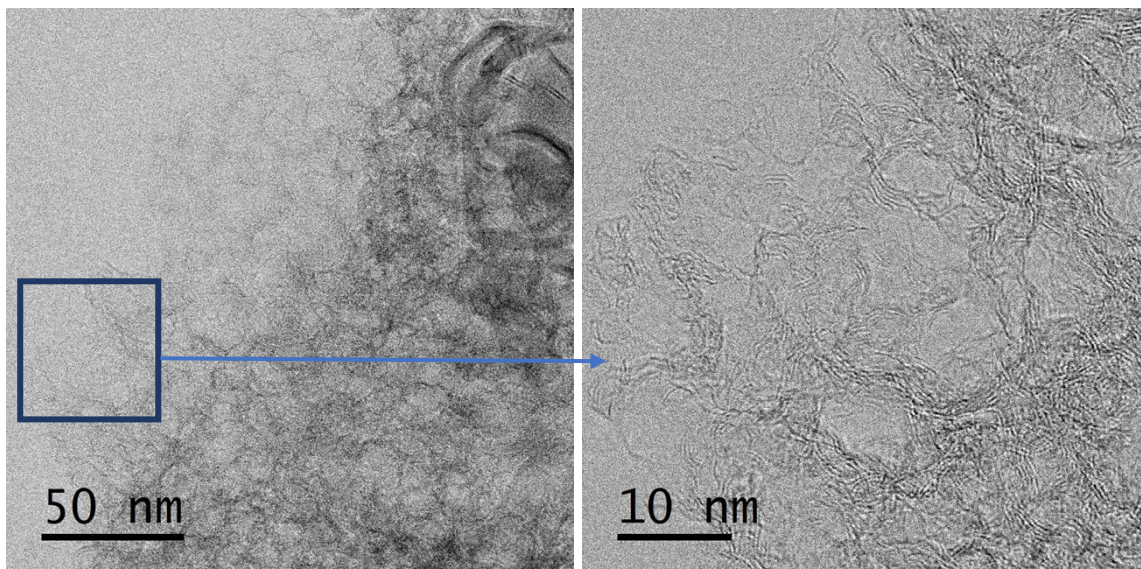

**Fig. S3.** ABF-STEM images of Co@NC-900 catalyst showing the disordered carbon phase in more detail.



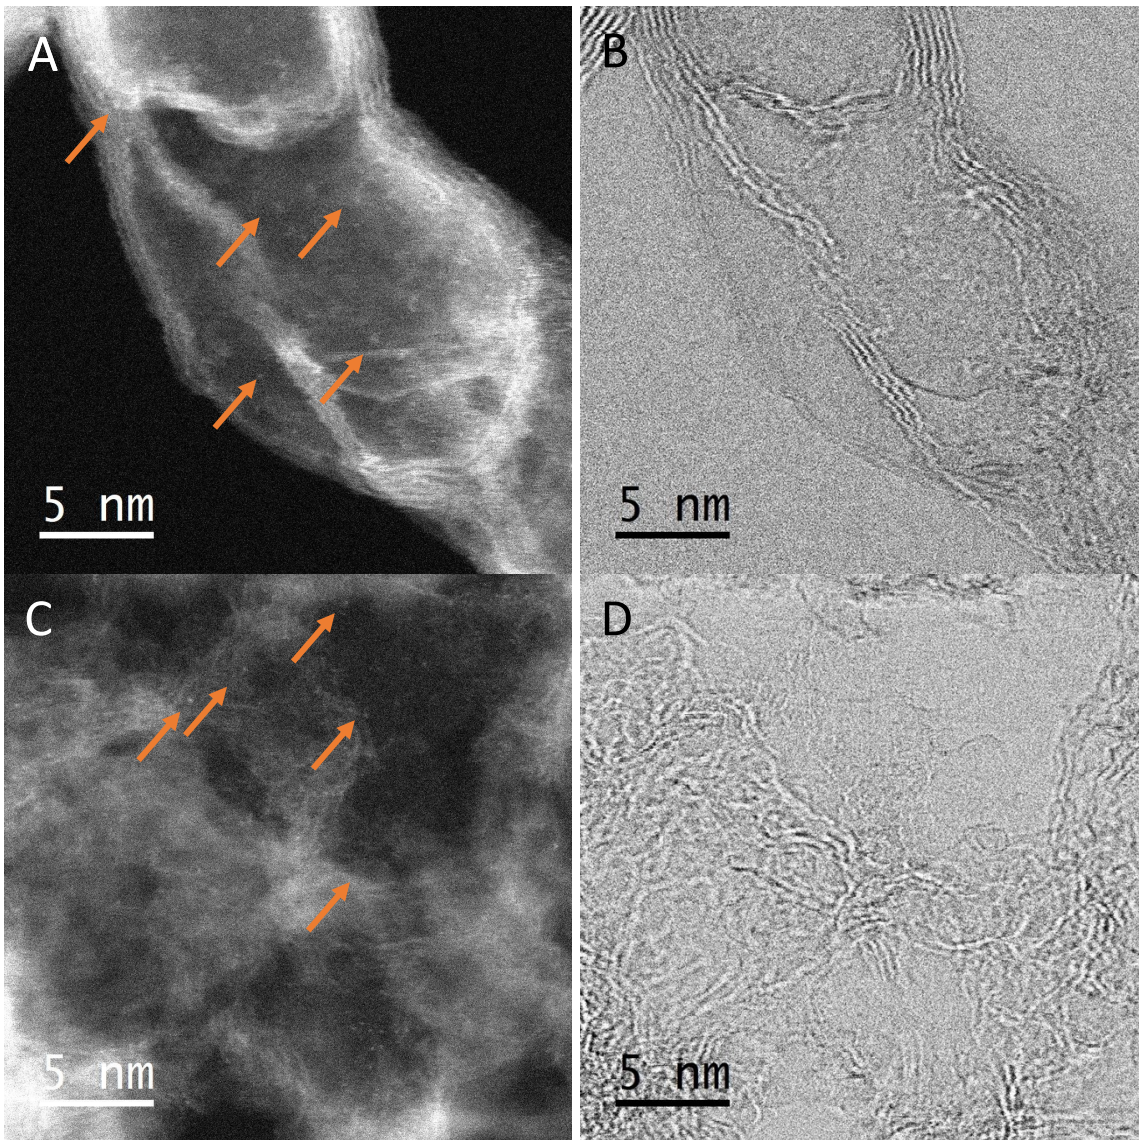

**Fig. S4.** HAADF-STEM images (A and C) of ordered carbon (A) and disordered carbon (C) with bright dots (some marked by arrows) potentially representing K atoms remaining on the surface and corresponding ABF-STEM images (B and D) highlighting the carbon structure.

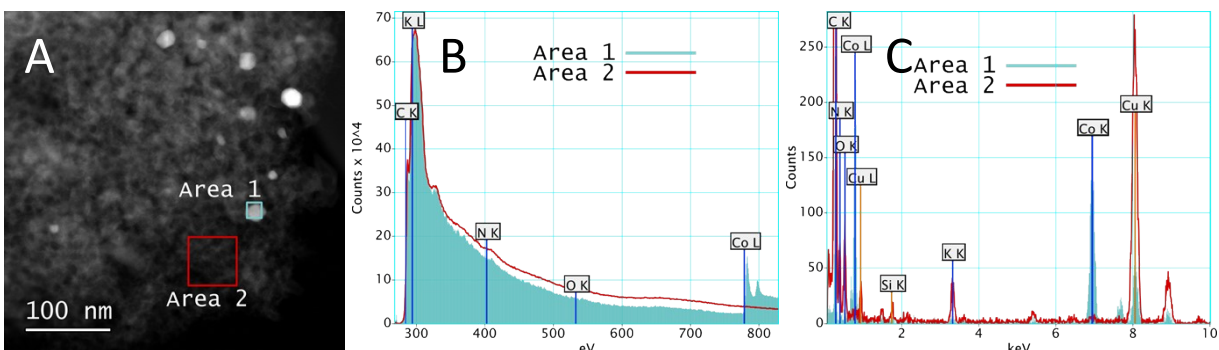

**Fig. S5.** ADF-STEM image (A) marked with reference frames from where the electron energy loss spectra (B) and the energy dispersive x-ray spectra (C) have been extracted from the spectrum image dataset. EDXS nicely shows the presence of K in areas where there are no Co particles. As there is also no Co signal of potentially dispersed Co atoms in area 2 this indicates the bright dots in S4 might stem from dispersed K atoms. EELS also indicates the metallic state of the Co particle in area 1 by the almost complete absence of an oxygen signal.

## S4. General procedure for the C3-alkylation of indoles with alcohols

### S4.1 C3-Alkylation of indoles with alcohols

In a 20 mL pressure tube fitted with magnetic stirring bar, 0.5 mmol of indole and 1 mmol alcohol, 50 mg catalyst (Co@NC-900) and 0.5 mmol  $K_3PO_4$  were added. Then, 2 mL tert-butanol was added, and the pressure tube was flushed with argon 3 times and fitted with screw cap. The pressure tube containing reaction mixture was placed in aluminum block and reaction was carried out under stirred condition at 150 °C for desired time. After the completion of the reaction, the pressure tube was cooled to room temperature. Then, the samples were removed from pressure tube, and the solid catalyst was filtered off and washed thoroughly with ethyl acetate. The reaction products were analyzed by GC-MS. The corresponding C3-alkylated indoles were purified by column chromatography (silica; pentene-ethyl acetate mixture) and characterized by NMR spectral analysis. Following procedure is applied for determining the conversions and yields by GC: after completion of the reaction, n-hexadecane (50  $\mu$ L) as standard was added to the reaction pressure tube and the reaction products were diluted with ethyl acetate followed by filtration using plug of silica and then analyzed by GC.

**Table S1.** C3-Alkylation of indole with benzyl alcohol: Evaluation of Co catalysts. <sup>[a]</sup>

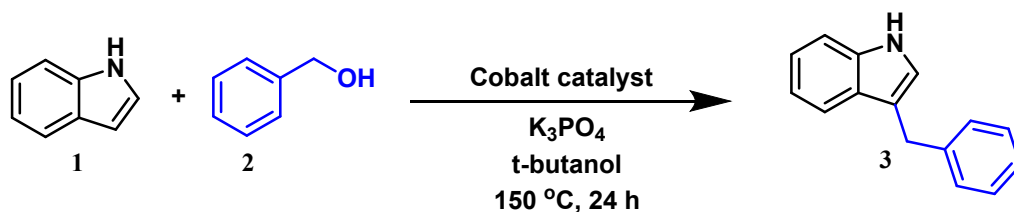

| Entry           | Catalyst                                                                               | Conversion of 1 (%) | Yield of 3 (%) |
|-----------------|----------------------------------------------------------------------------------------|---------------------|----------------|
| 1               | Co@NC-SiO <sub>2</sub> -900                                                            | 40                  | 39             |
| 2               | Co@NC-900                                                                              | >99                 | 97             |
| 3               | Co@NC-700                                                                              | 80                  | 77             |
| 4               | Co@NC-800                                                                              | 88                  | 85             |
| 5               | Co@NC-900<br>(Prepared without Zn(NO <sub>3</sub> ) <sub>2</sub> )                     | 74                  | 70             |
| 6               | Co-NPs <sup>[b]</sup>                                                                  | 59                  | 56             |
| 7               | Co(NO <sub>3</sub> ) <sub>2</sub> -Zn(NO <sub>3</sub> ) <sub>2</sub> -SiO <sub>2</sub> | <2                  | <1             |
| 8               | Co(NO <sub>3</sub> ) <sub>2</sub> -Zn(NO <sub>3</sub> ) <sub>2</sub> -DAP              | <2                  | <1             |
| 9               | Co(NO <sub>3</sub> ) <sub>2</sub> -DAP                                                 | <2                  | <1             |
| 10              | Without catalyst                                                                       | <2                  | <1             |
| 11 <sup>c</sup> | Co@NC-900                                                                              | 60                  | 56             |
| 12 <sup>d</sup> | Co@NC-900                                                                              | 91                  | 90             |

|    |        |    |    |
|----|--------|----|----|
| 13 | NC-900 | <2 | <1 |
|----|--------|----|----|

<sup>[a]</sup> Reaction conditions: 0.5 mmol indole, 1 mmol benzyl alcohol, 50 mg catalyst (1.26 mol% Co), 0.5 mmol K<sub>3</sub>PO<sub>4</sub> (1 equiv.), 2 mL t-butanol, 150 °C, 24 h, conversions and yields are based on indole and determined by GC using n-hexadecane standard. <sup>[b]</sup> Co-NPs were prepared by the pyrolysis of Co(NO<sub>3</sub>)<sub>2</sub>·6H<sub>2</sub>O, Zn(NO<sub>3</sub>)<sub>2</sub>·6H<sub>2</sub>O and colloidal silica at 900 °C and then silica was removed. <sup>[c]</sup> 130 °C. <sup>[d]</sup> 140 °C.

**Table S2.** C3-Alkylation of indole with benzyl alcohol: Testing of different bases.

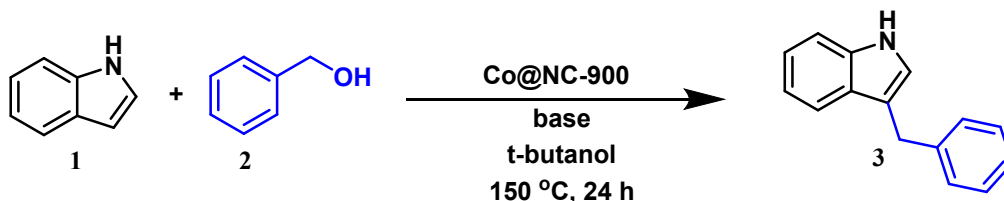

| Entry | Base                                           | Conv. (%) | Yield 3 (%) |
|-------|------------------------------------------------|-----------|-------------|
| 1     | K <sub>2</sub> CO <sub>3</sub><br>(1 equiv.)   | 62%       | 55%         |
| 2     | KOH<br>(1 equiv.)                              | 90%       | 87%         |
| 3     | t-BuOK<br>(1 equiv.)                           | >99%      | 96%         |
| 4     | K <sub>3</sub> PO <sub>4</sub><br>(1 equiv.)   | >99%      | 94%         |
| 5     | K <sub>3</sub> PO <sub>4</sub><br>(0.7 equiv.) | 71%       | 67%         |
| 6     | K <sub>3</sub> PO <sub>4</sub><br>(0.5 equiv.) | 49%       | 38%         |
| 7     | K <sub>3</sub> PO <sub>4</sub><br>(1.5 equiv.) | >99%      | 95%         |

Reaction conditions: 0.5 mmol indole, 1 mmol benzyl alcohol, 50 mg catalyst (1.26 mol% Co), 2 mL t-butanol, 150 °C, 24 h. Conversions and yields are based on indole and determined by GC using n-hexadecane standard.

**Table S3.** C3-Alkylation of indole with benzyl alcohol: Testing of different solvents.

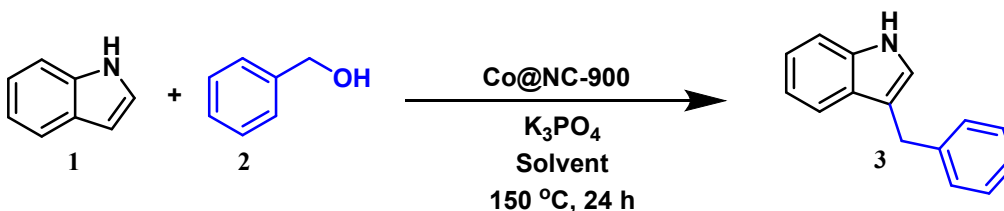

| Entry | Solvent   | Conv. (%) | Yield 3 (%) |
|-------|-----------|-----------|-------------|
| 1     | THF       | 65%       | 61%         |
| 2     | toluene   | 84%       | 80%         |
| 3     | dioxane   | 73%       | 70%         |
| 4     | t-butanol | >99%      | 94%         |



|   |                   |     |     |
|---|-------------------|-----|-----|
| 5 | isopropanol       | 85% | 82% |
| 6 | tert-amyl alcohol | 86% | 82% |

Reaction conditions: 0.5 mmol indole, 1 mmol benzyl alcohol, 50 mg catalyst (1.26 mol% Co), 2 mL t-butanol, 150 °C, 24 h. Conversions and yields are based on indole and determined by GC using n-hexadecane standard.

**Table S4.** C3-Alkylation of indole with benzyl alcohol: Testing of different alcohol amount.

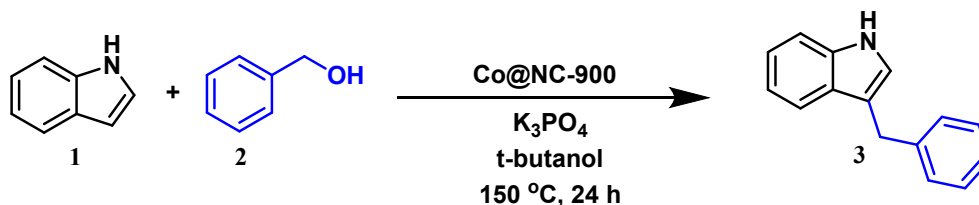

| Entry | Alcohol amount            | Conv. (%) | Yield 3 (%) |
|-------|---------------------------|-----------|-------------|
| 1     | 0.5 mmol<br>(1 equiv.)    | 71%       | 68%         |
| 2     | 0.75 mmol<br>(1.5 equiv.) | 80%       | 77%         |
| 3     | 1 mmol<br>(2 equiv.)      | >99%      | 94%         |

Reaction conditions: 0.5 mmol indole, 1 mmol benzyl alcohol, 50 mg catalyst (1.26 mol% Co), 2 mL t-butanol, 150 °C, 24 h. Conversions and yields are based on indole and determined by GC using n-hexadecane standard.

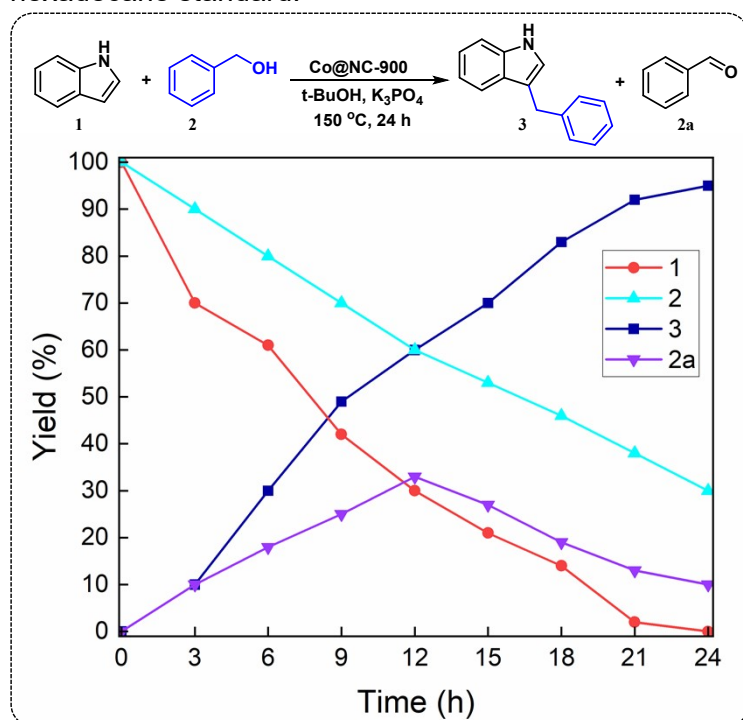

**Fig. S6.** C3-alkylation of indole with benzyl alcohol: reaction progress with time.

Reaction conditions: 0.5 mmol indole, 1 mmol benzyl alcohol, 50 mg catalyst (1.26 mol% Co), 2 mL t-butanol, 150 °C, 24 h. Conversions and yields are based on indole and determined by GC using n-hexadecane standard.



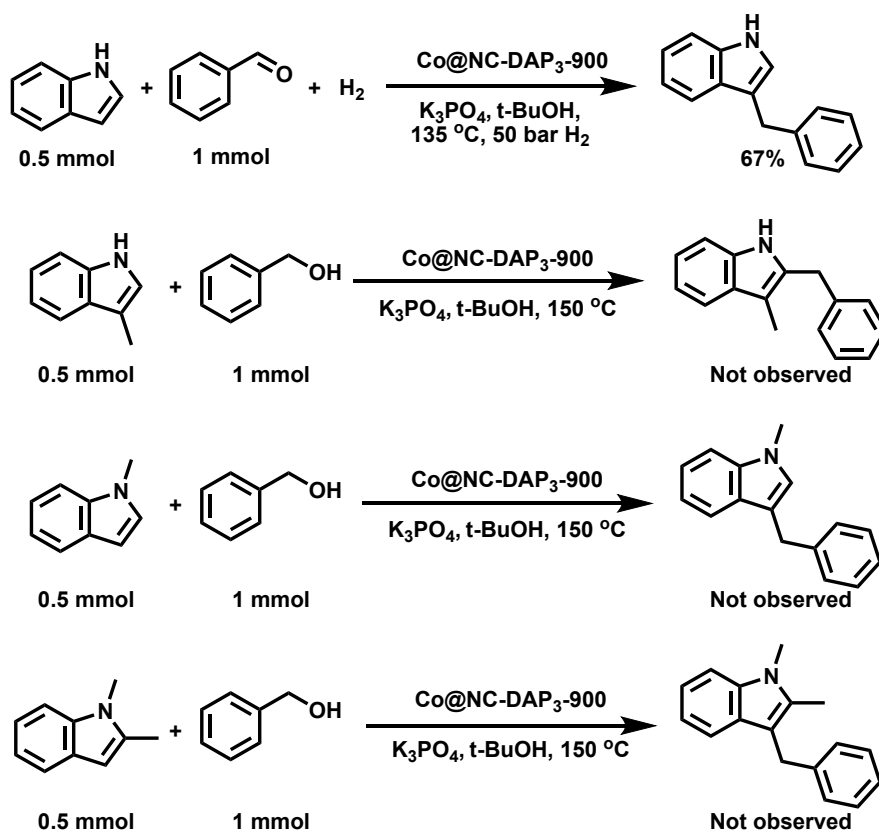

**Scheme S1.** Control reactions.

#### S4.2 Methylation of indoles

The magnetic stirring bar, 0.5 mmol indole, 70 mg Co@NC-900 and 1 mmol t-BuOK were transferred to 20 mL pressure tube. Then 1 mL methanol and 1 mL t-butanol were added to the above mixture. Then, the pressure tube was flushed with argon for 3 times and closed with screw cap. The pressure tube containing reaction mixtures were placed into aluminum block and allowed to progress at 160 °C for desired time. After the completion of the reaction, the pressure tube was cooled to room temperature. Then, the samples were removed from pressure tube, and the solid catalyst was filtered off and washed thoroughly with ethyl acetate. The reaction products were analyzed by GC-MS. The corresponding C3-alkylated products were purified by column chromatography (silica; pentene-ethyl acetate mixture) and characterized by NMR and GC-MS analysis.

#### S5 Catalyst recycling

The magnetic stirring bar, 1 mmol indole and 2 mmol benzyl alcohol, 100 mg Co@NC-900 and 1 mmol K<sub>3</sub>PO<sub>4</sub> were transferred to 20 mL pressure tube and 3 mL tert-butanol was added. The pressure tube was flushed with argon for 3 times and closed with screw cap. Then, it was placed into an aluminum block and heated to 150 °C for 24 h. After the completion of the reaction, the pressure tube was cooled down to room temperature. To the reaction products, 100 μL n-hexadecane as standard was added. The catalyst was then separated by centrifugation and the centrifugate containing reaction products was subjected to GC analysis. The separated catalyst was

then washed with water, methanol, and ethyl acetate, dried under vacuum and used without further purification or reactivation for the next run.

### S6 NMR data

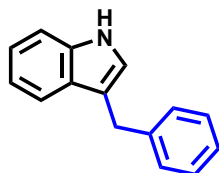

$^1\text{H}$  NMR (300 MHz, Chloroform-*d*)  $\delta$  7.92 (bs, 1H), 7.54 (dq,  $J = 7.8, 0.9$  Hz, 1H), 7.41 – 7.16 (m, 7H), 7.10 (ddd,  $J = 8.0, 7.0, 1.1$  Hz, 1H), 6.92 (dt,  $J = 2.2, 1.0$  Hz, 1H), 4.14 (s, 2H).

$^{13}\text{C}$  NMR (75 MHz, Chloroform-*d*)  $\delta$  141.23, 136.47, 128.72, 128.36, 127.49, 125.90, 122.35, 122.07, 119.39, 119.19, 115.87, 111.09, 31.62.

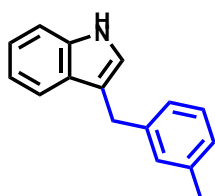

$^1\text{H}$  NMR (300 MHz, Chloroform-*d*)  $\delta$  7.64 (bs, 1H), 7.41 (dd,  $J = 7.8, 1.1$  Hz, 1H), 7.17 (dt,  $J = 8.1, 1.0$  Hz, 1H), 7.08 – 6.94 (m, 5H), 6.88 (d,  $J = 7.4$  Hz, 1H), 6.70 (dt,  $J = 2.2, 1.0$  Hz, 1H), 3.94 (s, 2H), 2.17 (s, 3H).

$^{13}\text{C}$  NMR (75 MHz, Chloroform-*d*)  $\delta$  141.27, 137.96, 136.49, 129.57, 128.32, 126.74, 125.83, 122.43, 122.07, 122.04, 119.41, 119.24, 115.94, 111.16, 111.13, 102.62, 31.59, 21.53.

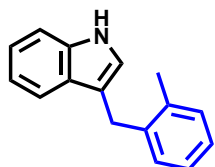

$^1\text{H}$  NMR (400 MHz, Chloroform-*d*)  $\delta$  7.90 (bs, 1H), 7.67 – 7.61 (m, 1H), 7.41 (dt,  $J = 8.1, 0.9$  Hz, 1H), 7.28 – 7.17 (m, 6H), 6.76 (dt,  $J = 2.2, 1.1$  Hz, 1H), 4.14 (d,  $J = 1.1$  Hz, 2H), 2.40 (s, 3H).

$^{13}\text{C}$  NMR (101 MHz, Chloroform-*d*)  $\delta$  139.13, 136.52, 136.48, 130.17, 129.45, 127.59, 126.23, 125.99, 122.45, 122.08, 119.37, 119.10, 115.20, 111.13, 29.29, 19.56.

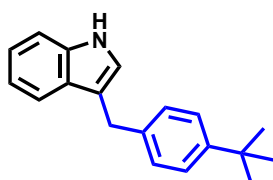

$^1\text{H}$  NMR (400 MHz, Chloroform-*d*)  $\delta$  7.77 (bs, 1H), 7.52 – 7.47 (m, 1H), 7.29 – 7.21 (m, 3H), 7.18 – 7.13 (m, 2H), 7.12 – 7.09 (m, 1H), 7.02 (ddd,  $J = 8.0, 7.0, 1.1$  Hz, 1H), 6.82 (dt,  $J = 2.0, 0.9$  Hz, 1H), 4.02 (d,  $J = 0.9$  Hz, 2H), 1.24 (s, 9H).

$^{13}\text{C}$  NMR (101 MHz, Chloroform-*d*)  $\delta$  148.67, 138.23, 136.47, 128.34, 127.59, 125.27, 122.35, 122.04, 119.36, 119.24, 116.03, 111.11, 34.41, 31.49, 31.03.

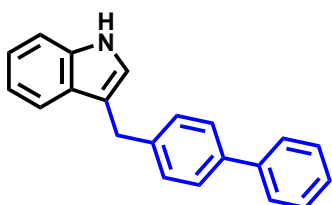

$^1\text{H}$  NMR (300 MHz, DMSO)  $\delta$  10.87 (s, 1H), 7.58 (dd,  $J$  = 18.7, 7.5 Hz, 4H), 7.50 – 7.27 (m, 7H), 7.21 (d,  $J$  = 2.1 Hz, 1H), 7.10 – 7.00 (m, 1H), 6.94 (t,  $J$  = 7.4 Hz, 1H), 4.08 (s, 2H).

$^{13}\text{C}$  NMR (75 MHz, DMSO)  $\delta$  141.64, 140.58, 138.03, 136.88, 129.43, 129.33, 127.58, 127.44, 126.97, 126.94, 123.65, 121.41, 119.01, 118.76, 114.15, 111.87, 31.11.

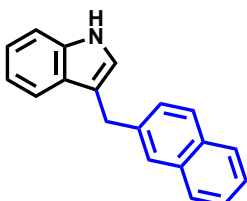

$^1\text{H}$  NMR (400 MHz, DMSO- $d_6$ )  $\delta$  10.91 (s, 1H), 7.86 – 7.77 (m, 4H), 7.50 – 7.34 (m, 5H), 7.23 (d,  $J$  = 2.4 Hz, 1H), 7.06 (ddd,  $J$  = 8.1, 6.9, 1.2 Hz, 1H), 6.93 (ddd,  $J$  = 8.0, 7.0, 1.0 Hz, 1H), 4.22 (s, 2H).

$^{13}\text{C}$  NMR (101 MHz, DMSO- $d_6$ )  $\delta$  139.94, 136.94, 133.63, 132.03, 128.09, 128.05, 127.93, 127.79, 127.52, 126.54, 126.41, 125.63, 123.78, 121.44, 119.02, 118.78, 114.13, 111.91, 31.79.

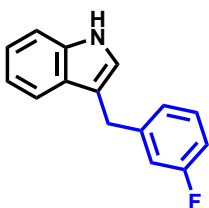

$^1\text{H}$  NMR (300 MHz, Chloroform- $d$ )  $\delta$  7.87 (bs, 1H), 7.46 (ddt,  $J$  = 7.9, 1.3, 0.7 Hz, 1H), 7.31 (dt,  $J$  = 8.1, 1.0 Hz, 1H), 7.21 – 7.13 (m, 2H), 7.10 – 6.99 (m, 2H), 6.99 – 6.77 (m, 3H), 4.07 (t,  $J$  = 0.7 Hz, 2H).

$^{13}\text{C}$  NMR (75 MHz, Chloroform- $d$ )  $\delta$  163.03 (d,  $J$  = 245.1 Hz), 143.95 (d,  $J$  = 6.9 Hz), 136.48, 129.72 (d,  $J$  = 8.3 Hz), 127.33, 124.32 (d,  $J$  = 2.8 Hz), 122.47, 122.22, 119.53, 119.09, 115.68, 115.40, 114.98, 112.83 (d,  $J$  = 21.1 Hz), 111.20, 31.39 (d,  $J$  = 1.7 Hz).

$^{19}\text{F}$  NMR (376 MHz, Chloroform- $d$ )  $\delta$  -113.76 (td,  $J$  = 9.1, 5.7 Hz).

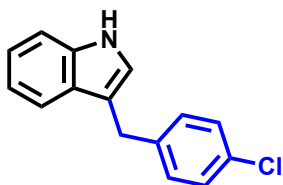

$^1\text{H}$  NMR (300 MHz, Chloroform- $d$ )  $\delta$  7.83 (s, 1H), 7.36 (ddt,  $J$  = 7.9, 1.4, 0.8 Hz, 1H), 7.14 – 7.05 (m, 5H), 6.97 (ddd,  $J$  = 8.0, 7.0, 1.1 Hz, 1H), 6.79 (dt,  $J$  = 2.2, 1.0 Hz, 1H), 3.99 – 3.92 (m, 2H).

$^{13}\text{C}$  NMR (75 MHz, Chloroform- $d$ )  $\delta$  139.70, 136.48, 131.61, 130.03, 128.72, 128.44, 127.28, 122.38, 122.22, 119.50, 119.07, 115.28, 111.17, 31.02.



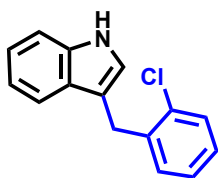

$^1\text{H}$  NMR (400 MHz, Chloroform-*d*)  $\delta$  7.97 (bs, 1H), 7.57 (dq,  $J = 7.9, 0.9$  Hz, 1H), 7.42 – 7.35 (m, 2H), 7.24 – 7.19 (m, 2H), 7.17 – 7.09 (m, 3H), 6.95 (dt,  $J = 2.1, 1.0$  Hz, 1H), 4.23 (t,  $J = 0.8$  Hz, 2H).  
 $^{13}\text{C}$  NMR (101 MHz, Chloroform-*d*)  $\delta$  138.75, 136.39, 134.02, 130.58, 129.37, 127.43, 127.38, 126.75, 122.76, 122.13, 119.49, 119.13, 114.02, 111.15, 29.09.

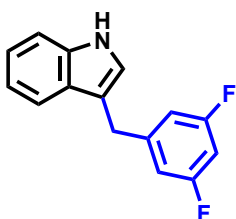

$^1\text{H}$  NMR (300 MHz, Chloroform-*d*)  $\delta$  8.02 (bs, 1H), 7.47 (ddt,  $J = 7.9, 1.4, 0.8$  Hz, 1H), 7.38 (dt,  $J = 8.1, 1.0$  Hz, 1H), 7.22 (ddd,  $J = 8.2, 7.1, 1.3$  Hz, 1H), 7.10 (ddd,  $J = 8.1, 7.1, 1.1$  Hz, 1H), 6.99 (dd,  $J = 2.3, 1.1$  Hz, 1H), 6.90 – 6.70 (m, 2H), 6.63 (tdd,  $J = 9.0, 2.6, 2.1$  Hz, 1H), 4.11 – 4.09 (m, 2H).  
 $^{13}\text{C}$  NMR (75 MHz, Chloroform-*d*)  $\delta$  164.77, 161.49, 136.48, 127.16, 122.54, 122.34, 119.66, 118.93, 114.09, 111.52, 111.42, 111.22, 111.19, 101.73, 101.40, 101.06, 31.39.  
 $^{19}\text{F}$  NMR (282 MHz,  $\text{CDCl}_3$ )  $\delta$  -110.73 (t,  $J = 8.3$  Hz).

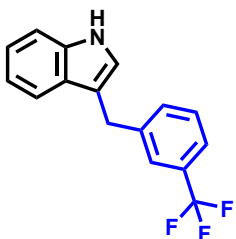

$^1\text{H}$  NMR (400 MHz, Chloroform-*d*)  $\delta$  7.86 (bs, 1H), 7.48 (d,  $J = 2.2$  Hz, 1H), 7.44 – 7.32 (m, 3H), 7.31 – 7.21 (m, 2H), 7.18 – 7.06 (m, 1H), 7.06 – 6.95 (m, 1H), 6.91 – 6.72 (m, 1H), 4.08 (s, 2H).  
 $^{13}\text{C}$  NMR (101 MHz, Chloroform-*d*)  $\delta$  142.17, 136.48, 132.08, 130.62 (q,  $J = 31.9$  Hz), 128.78, 127.24, 125.68, 125.39 (q,  $J = 3.9$  Hz), 122.88 (q,  $J = 3.8$  Hz), 122.49, 122.29, 119.60, 118.96, 114.83, 111.22, 31.47.  
 $^{19}\text{F}$  NMR (376 MHz, Chloroform-*d*)  $\delta$  -62.39 (d,  $J = 2.6$  Hz).

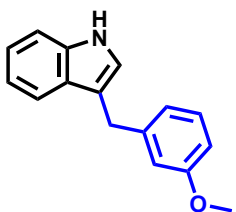

$^1\text{H}$  NMR (300 MHz, Chloroform-*d*)  $\delta$  7.81 (bs, 1H), 7.44 (ddt,  $J = 7.8, 1.4, 0.7$  Hz, 1H), 7.23 (dt,  $J = 8.1, 1.0$  Hz, 1H), 7.13 – 7.06 (m, 2H), 7.02 – 6.96 (m, 1H), 6.83 – 6.74 (m, 3H), 6.65 (dddd,  $J = 8.2, 2.7, 1.0, 0.5$  Hz, 1H), 4.00 (s, 2H), 3.66 (s, 3H).  
 $^{13}\text{C}$  NMR (75 MHz, Chloroform-*d*)  $\delta$  159.69, 142.96, 136.47, 129.33, 127.49, 122.41, 122.06, 121.24, 119.40, 119.16, 115.60, 114.59, 111.20, 111.12, 55.17, 31.68.

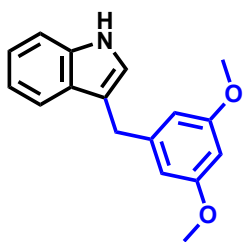

$^1\text{H}$  NMR (300 MHz, Chloroform-*d*)  $\delta$  7.96 (bs, 1H), 7.65 – 7.51 (m, 1H), 7.35 (dt,  $J$  = 8.1, 0.9 Hz, 1H), 7.25 – 7.16 (m, 1H), 7.11 (ddd,  $J$  = 8.0, 7.0, 1.1 Hz, 1H), 6.93 (dt,  $J$  = 2.1, 1.0 Hz, 1H), 6.50 (dt,  $J$  = 2.3, 0.6 Hz, 2H), 6.35 (t,  $J$  = 2.3 Hz, 1H), 4.09 – 4.07 (m, 2H), 3.77 (s, 6H).

$^{13}\text{C}$  NMR (75 MHz, Chloroform-*d*)  $\delta$  160.78, 143.77, 136.46, 127.49, 122.42, 122.05, 119.40, 119.13, 115.40, 111.11, 106.95, 97.88, 55.29, 31.92.

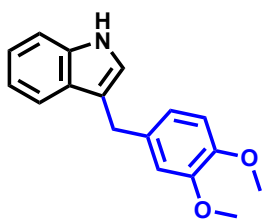

$^1\text{H}$  NMR (300 MHz, Chloroform-*d*)  $\delta$  7.99 (bs, 1H), 7.54 (ddt,  $J$  = 7.9, 1.4, 0.7 Hz, 1H), 7.36 (dt,  $J$  = 8.1, 1.0 Hz, 1H), 7.23 – 7.16 (m, 1H), 7.09 (ddd,  $J$  = 8.1, 7.0, 1.1 Hz, 1H), 6.92 – 6.77 (m, 4H), 4.09 – 4.07 (m, 2H), 3.86 (s, 3H), 3.82 (s, 3H).

$^{13}\text{C}$  NMR (75 MHz, Chloroform-*d*)  $\delta$  148.84, 147.24, 136.50, 133.82, 127.44, 122.26, 122.06, 120.59, 119.35, 119.14, 116.15, 112.11, 111.17, 111.10, 55.94, 55.82, 31.24.

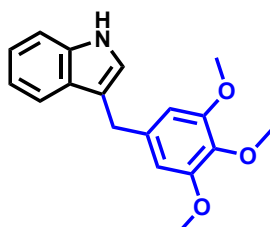

$^1\text{H}$  NMR (300 MHz, Chloroform-*d*)  $\delta$  8.02 (bs, 1H), 7.56 (ddt,  $J$  = 7.8, 1.4, 0.7 Hz, 1H), 7.37 (dt,  $J$  = 8.1, 1.0 Hz, 1H), 7.20 (dddd,  $J$  = 8.1, 7.1, 1.3, 0.4 Hz, 1H), 7.13 – 7.07 (m, 1H), 6.93 (dd,  $J$  = 2.3, 1.1 Hz, 1H), 6.53 (d,  $J$  = 0.6 Hz, 2H), 4.07 – 4.06 (m, 2H), 3.83 (s, 3H), 3.80 (s, 6H).

$^{13}\text{C}$  NMR (75 MHz, Chloroform-*d*)  $\delta$  153.12, 136.93, 136.48, 127.43, 122.32, 122.11, 119.40, 119.07, 115.72, 111.12, 105.75, 60.88, 56.07, 32.00.

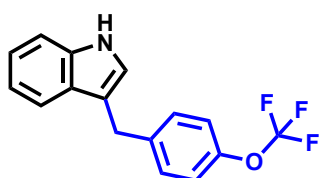

$^1\text{H}$  NMR (300 MHz, Chloroform-*d*)  $\delta$  7.97 (bs, 1H), 7.50 (ddt,  $J$  = 7.9, 1.5, 0.8 Hz, 1H), 7.38 (dt,  $J$  = 8.2, 0.9 Hz, 1H), 7.31 (dt,  $J$  = 1.5, 0.8 Hz, 1H), 7.30 – 7.28 (m, 1H), 7.22 (ddd,  $J$  = 8.2, 7.0, 1.3 Hz, 1H), 7.17 – 7.07 (m, 3H), 6.94 (dt,  $J$  = 2.2, 1.0 Hz, 1H), 4.13 (q,  $J$  = 0.8 Hz, 2H).

$^{13}\text{C}$  NMR (75 MHz, Chloroform-*d*)  $\delta$  147.48, 139.99, 136.49, 129.85, 127.28, 122.42, 122.25, 120.90, 119.53, 119.04, 118.85, 115.19, 111.19, 30.94.

$^{19}\text{F}$  NMR (282 MHz, Chloroform-*d*)  $\delta$  -57.87.

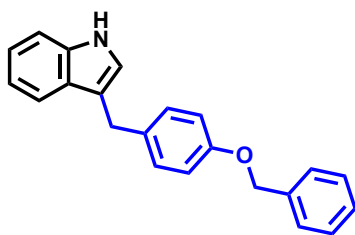

$^1\text{H}$  NMR (400 MHz, Chloroform-*d*)  $\delta$  7.93 (bs, 1H), 7.53 (dq,  $J$  = 7.9, 0.9 Hz, 1H), 7.45 – 7.30 (m, 6H), 7.23 – 7.17 (m, 3H), 7.09 (ddd,  $J$  = 8.0, 7.0, 1.0 Hz, 1H), 6.94 – 6.88 (m, 3H), 5.04 (s, 2H), 4.07 (s, 2H).

$^{13}\text{C}$  NMR (101 MHz, Chloroform-*d*)  $\delta$  157.10, 137.25, 136.49, 133.62, 129.62, 128.58, 127.91, 127.51, 127.45, 122.23, 122.04, 119.35, 119.20, 116.26, 114.73, 111.07, 70.08, 30.73.

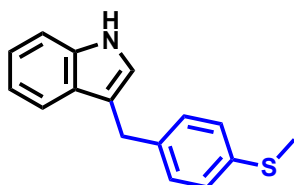

$^1\text{H}$  NMR (300 MHz, Chloroform-*d*)  $\delta$  7.99 (bs, 1H), 7.57 (ddt,  $J$  = 7.9, 1.4, 0.7 Hz, 1H), 7.39 (dt,  $J$  = 8.1, 1.0 Hz, 1H), 7.29 – 7.22 (m, 5H), 7.15 (ddd,  $J$  = 8.0, 7.0, 1.0 Hz, 1H), 6.94 (dd,  $J$  = 2.2, 1.1 Hz, 1H), 4.15 – 4.11 (m, 2H), 2.51 (s, 3H).

$^{13}\text{C}$  NMR (75 MHz, Chloroform-*d*)  $\delta$  138.45, 136.50, 135.37, 129.72, 129.27, 127.41, 127.15, 123.76, 122.40, 122.11, 119.41, 119.15, 115.63, 111.17, 31.11, 16.34.

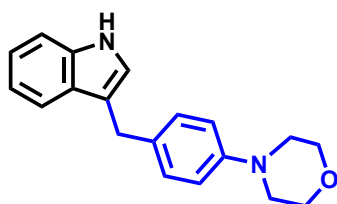

$^1\text{H}$  NMR (400 MHz, Chloroform-*d*)  $\delta$  7.96 (bs, 1H), 7.52 (dq,  $J$  = 7.9, 0.9 Hz, 1H), 7.35 (dt,  $J$  = 8.2, 0.9 Hz, 1H), 7.25 – 7.14 (m, 3H), 7.07 (ddd,  $J$  = 8.0, 7.0, 1.0 Hz, 1H), 6.91 (dd,  $J$  = 2.3, 1.1 Hz, 3H), 4.07 – 4.03 (m, 2H), 3.88 (s, 4H), 3.14 (t,  $J$  = 4.8 Hz, 4H).

$^{13}\text{C}$  NMR (75 MHz, Chloroform-*d*)  $\delta$  143.75, 136.50, 129.50, 129.24, 127.45, 122.26, 122.02, 119.31, 119.18, 116.37, 116.11, 111.08, 66.73, 50.21, 30.72.

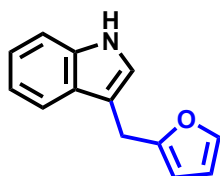

$^1\text{H}$  NMR (400 MHz, Chloroform-*d*)  $\delta$  7.92 (bs, 1H), 7.63 – 7.59 (m, 1H), 7.39 – 7.33 (m, 2H), 7.23 (ddd,  $J$  = 8.2, 7.0, 1.2 Hz, 1H), 7.15 (ddd,  $J$  = 8.0, 7.0, 1.1 Hz, 1H), 7.04 (dt,  $J$  = 2.2, 1.0 Hz, 1H), 6.32 (dd,  $J$  = 3.2, 1.9 Hz, 1H), 6.06 (dq,  $J$  = 3.0, 0.9 Hz, 1H), 4.16 (d,  $J$  = 1.1 Hz, 2H).

$^{13}\text{C}$  NMR (101 MHz, Chloroform-*d*)  $\delta$  154.93, 141.11, 136.34, 127.27, 122.38, 122.14, 119.49, 119.10, 112.64, 111.17, 110.32, 105.72, 24.50.



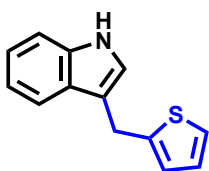

$^1\text{H}$  NMR (300 MHz, Chloroform-*d*)  $\delta$  7.85 (bs, 1H), 7.49 (ddt,  $J = 7.8, 1.4, 0.8$  Hz, 1H), 7.30 – 7.25 (m, 1H), 7.18 – 7.08 (m, 1H), 7.07 – 6.99 (m, 2H), 6.94 (dt,  $J = 2.1, 1.0$  Hz, 1H), 6.88 – 6.78 (m, 2H), 4.24 (t,  $J = 1.0$  Hz, 2H).

$^{13}\text{C}$  NMR (75 MHz, Chloroform-*d*)  $\delta$  144.69, 136.39, 127.13, 126.73, 124.75, 123.44, 122.28, 122.19, 119.50, 119.07, 115.31, 111.17, 25.97.

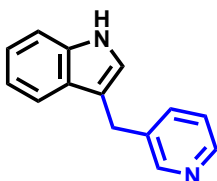

$^1\text{H}$  NMR (300 MHz, Chloroform-*d*)  $\delta$  8.63 – 8.43 (m, 2H), 8.37 (bs, 1H), 7.53 (dddt,  $J = 24.7, 7.9, 1.4, 0.8$  Hz, 2H), 7.36 (dt,  $J = 8.1, 0.9$  Hz, 1H), 7.24 – 7.16 (m, 2H), 7.09 (ddd,  $J = 8.0, 7.0, 1.1$  Hz, 1H), 6.93 (dt,  $J = 2.2, 1.0$  Hz, 1H), 4.12 (s, 2H).

$^{13}\text{C}$  NMR (75 MHz, Chloroform-*d*)  $\delta$  149.83, 147.19, 136.82, 136.56, 136.41, 127.12, 123.45, 122.55, 122.25, 119.55, 118.85, 114.35, 111.28, 28.88.

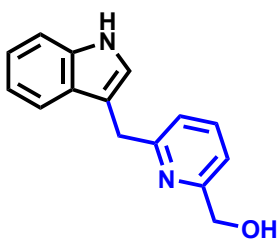

$^1\text{H}$  NMR (300 MHz, Chloroform-*d*)  $\delta$  8.42 (bs, 1H), 7.59 – 7.45 (m, 2H), 7.32 (dt,  $J = 8.1, 1.0$  Hz, 1H), 7.23 – 7.01 (m, 4H), 6.97 (d,  $J = 2.3$  Hz, 1H), 4.77 (s, 2H), 4.61 (bs, 1H), 4.30 (s, 2H).

$^{13}\text{C}$  NMR (75 MHz, Chloroform-*d*)  $\delta$  160.29, 158.18, 137.36, 136.47, 127.43, 122.92, 122.03, 121.40, 119.41, 119.08, 118.01, 113.40, 111.32, 63.94, 34.14.

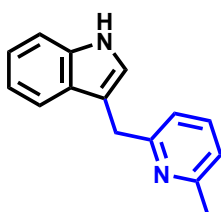

$^1\text{H}$  NMR (400 MHz, Chloroform-*d*)  $\delta$  8.25 (bs, 1H), 7.53 (dt,  $J = 7.9, 0.9$  Hz, 1H), 7.42 (t,  $J = 7.7$  Hz, 1H), 7.35 (dd,  $J = 8.1, 0.9$  Hz, 1H), 7.18 (ddd,  $J = 8.2, 7.0, 1.1$  Hz, 1H), 7.13 – 6.85 (m, 4H), 4.30 (s, 2H), 2.59 (s, 3H).

$^{13}\text{C}$  NMR (101 MHz, Chloroform-*d*)  $\delta$  160.54, 157.48, 136.96, 136.46, 127.52, 122.83, 122.03, 120.72, 119.73, 119.39, 119.26, 113.78, 111.13, 34.31, 24.40.

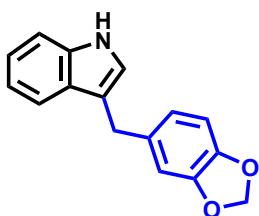

$^1\text{H}$  NMR (400 MHz, Chloroform-*d*)  $\delta$  7.89 (bs, 1H), 7.59 – 7.55 (m, 1H), 7.36 (dt,  $J$  = 8.1, 0.9 Hz, 1H), 7.24 (ddd,  $J$  = 8.2, 7.0, 1.2 Hz, 1H), 7.14 (ddd,  $J$  = 8.0, 7.0, 1.1 Hz, 1H), 6.92 (dt,  $J$  = 2.2, 1.0 Hz, 1H), 6.84 – 6.76 (m, 3H), 5.93 (s, 2H), 4.08 (s, 2H).

$^{13}\text{C}$  NMR (101 MHz, Chloroform-*d*)  $\delta$  147.64, 145.73, 136.52, 135.23, 127.40, 122.33, 122.12, 121.44, 119.44, 119.20, 115.94, 111.17, 109.31, 108.13, 100.82, 31.38.

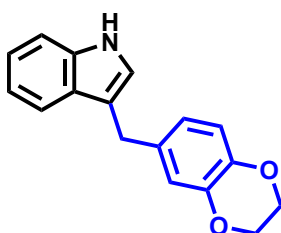

$^1\text{H}$  NMR (300 MHz, Chloroform-*d*)  $\delta$  7.94 (bs, 1H), 7.54 (ddt,  $J$  = 7.8, 1.3, 0.7 Hz, 1H), 7.38 – 7.32 (m, 1H), 7.19 (dddd,  $J$  = 8.2, 7.1, 1.3, 0.4 Hz, 1H), 7.09 (ddd,  $J$  = 8.1, 7.0, 1.1 Hz, 1H), 6.93 (dt,  $J$  = 2.2, 1.0 Hz, 1H), 6.83 – 6.76 (m, 3H), 4.22 (s, 4H), 4.02 (t,  $J$  = 0.9 Hz, 2H).

$^{13}\text{C}$  NMR (75 MHz, Chloroform-*d*)  $\delta$  143.29, 141.70, 136.48, 134.67, 127.44, 122.25, 122.02, 121.59, 119.35, 119.18, 117.33, 116.99, 115.94, 111.07, 64.41, 64.34, 30.85.

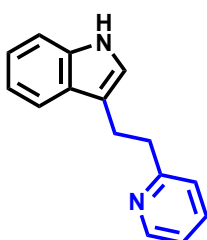

$^1\text{H}$  NMR (300 MHz, Chloroform-*d*)  $\delta$  8.67 – 8.54 (m, 1H), 7.61 (ddd,  $J$  = 7.8, 1.3, 0.8 Hz, 1H), 7.50 (td,  $J$  = 7.7, 1.8 Hz, 1H), 7.41 – 7.31 (m, 1H), 7.24 – 7.01 (m, 3H), 7.01 – 6.79 (m, 2H), 6.41 (dd,  $J$  = 3.2, 0.9 Hz, 1H), 4.58 (t,  $J$  = 7.1 Hz, 2H), 3.29 (t,  $J$  = 7.1 Hz, 2H).

$^{13}\text{C}$  NMR (75 MHz, Chloroform-*d*)  $\delta$  158.27, 149.24, 136.80, 135.79, 128.59, 127.86, 123.85, 121.85, 121.44, 120.95, 119.29, 109.31, 101.12, 46.10, 38.72.

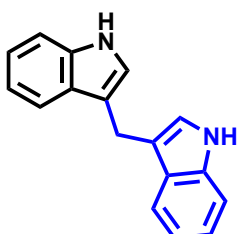

$^1\text{H}$  NMR (300 MHz, Chloroform-*d*)  $\delta$  7.88 (bs, 2H), 7.64 (ddt,  $J$  = 7.8, 1.4, 0.8 Hz, 2H), 7.36 (ddd,  $J$  = 8.1, 0.8 Hz, 2H), 7.24 – 7.16 (m, 2H), 7.10 (ddd,  $J$  = 7.8, 7.0, 1.1 Hz, 2H), 6.96 – 6.89 (m, 2H), 4.25 (t,  $J$  = 1.0 Hz, 2H).

$^{13}\text{C}$  NMR (75 MHz, Chloroform-*d*)  $\delta$  136.48, 127.59, 122.22, 121.90, 119.24, 119.19, 115.70, 111.06, 21.22.

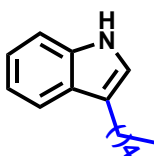

$^1\text{H}$  NMR (300 MHz, Chloroform-*d*)  $\delta$  7.89 (bs, 1H), 7.62 (ddt,  $J$  = 7.8, 1.3, 0.6 Hz, 1H), 7.40 – 7.31 (m, 1H), 7.23 – 7.07 (m, 2H), 6.98 (dt,  $J$  = 2.1, 1.0 Hz, 1H), 2.80 – 2.71 (m, 2H), 1.80 – 1.66 (m, 2H), 1.49 – 1.27 (m, 4H), 0.96 – 0.83 (m, 3H).

$^{13}\text{C}$  NMR (75 MHz, Chloroform-*d*)  $\delta$  148.43, 136.35, 124.59, 121.82, 120.98, 119.04, 117.26, 111.01, 31.88, 29.87, 25.13, 22.61, 14.13.

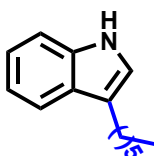

$^1\text{H}$  NMR (300 MHz, Chloroform-*d*)  $\delta$  7.88 (bs, 1H), 7.68 – 7.55 (m, 1H), 7.36 (dt,  $J$  = 8.1, 1.0 Hz, 1H), 7.25 – 7.03 (m, 2H), 7.01 – 6.93 (m, 1H), 2.89 – 2.62 (m, 2H), 1.83 – 1.64 (m, 2H), 1.45 – 1.25 (m, 6H), 0.97 – 0.82 (m, 3H).

$^{13}\text{C}$  NMR (75 MHz, Chloroform-*d*)  $\delta$  136.35, 128.25, 127.66, 121.82, 120.98, 119.04, 117.26, 111.01, 31.81, 30.16, 29.37, 25.18, 22.72, 14.16.

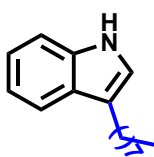

$^1\text{H}$  NMR (300 MHz, Chloroform-*d*)  $\delta$  7.79 (bs, 1H), 7.54 (ddt,  $J$  = 7.7, 1.4, 0.7 Hz, 1H), 7.32 – 7.22 (m, 1H), 7.14 – 7.00 (m, 2H), 6.89 (dt,  $J$  = 2.2, 1.0 Hz, 1H), 2.67 (ddt,  $J$  = 8.6, 7.0, 0.8 Hz, 2H), 1.71 – 1.55 (m, 2H), 1.44 – 0.90 (m, 10H), 0.84 – 0.77 (m, 3H).

$^{13}\text{C}$  NMR (75 MHz, Chloroform-*d*)  $\delta$  136.37, 127.67, 121.82, 120.97, 119.04, 117.27, 111.00, 31.81, 30.16, 29.70, 29.55, 29.36, 25.18, 22.71, 14.14.

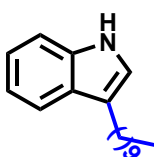

$^1\text{H}$  NMR (300 MHz, Chloroform-*d*)  $\delta$  7.82 (bs, 1H), 7.67 (dq,  $J$  = 7.7, 0.9 Hz, 1H), 7.37 (dt,  $J$  = 8.1, 1.0 Hz, 1H), 7.29 – 7.11 (m, 2H), 6.97 (dd,  $J$  = 2.3, 1.1 Hz, 1H), 2.94 – 2.70 (m, 2H), 1.88 – 1.66 (m, 2H), 1.51 – 1.26 (m, 14H), 1.08 – 0.80 (m, 3H).

$^{13}\text{C}$  NMR (75 MHz, Chloroform-*d*)  $\delta$  136.39, 127.70, 121.85, 121.05, 119.08, 117.24, 111.08, 32.01, 30.26, 29.77, 29.75, 29.66, 29.45, 25.23, 22.78, 14.21.



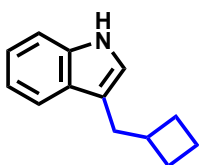

$^1\text{H}$  NMR (400 MHz, Chloroform-*d*)  $\delta$  7.89 (bs, 1H), 7.61 (d,  $J$  = 7.8 Hz, 1H), 7.35 (d,  $J$  = 8.0 Hz, 1H), 7.24 – 7.04 (m, 2H), 6.94 (d,  $J$  = 2.3 Hz, 1H), 2.85 (d,  $J$  = 7.4 Hz, 2H), 2.72 (dt,  $J$  = 15.2, 7.7 Hz, 1H), 2.18 – 2.01 (m, 2H), 1.88 (dddd,  $J$  = 12.3, 10.6, 4.8, 3.3 Hz, 2H), 1.81 – 1.71 (m, 2H).

$^{13}\text{C}$  NMR (101 MHz, Chloroform-*d*)  $\delta$  136.25, 127.82, 121.81, 121.13, 119.07, 119.03, 115.56, 110.97, 36.27, 32.31, 28.45, 18.29.

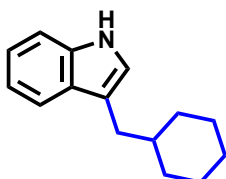

$^1\text{H}$  NMR (300 MHz, Chloroform-*d*)  $\delta$  7.90 (bs, 1H), 7.61 (ddt,  $J$  = 7.7, 1.5, 0.7 Hz, 1H), 7.41 – 7.30 (m, 1H), 7.19 (ddd,  $J$  = 8.2, 7.0, 1.3 Hz, 1H), 7.15 – 7.07 (m, 1H), 6.95 (dd,  $J$  = 2.1, 1.0 Hz, 1H), 2.64 (dd,  $J$  = 6.9, 0.8 Hz, 2H), 1.82 – 1.56 (m, 7H), 1.21 – 1.15 (m, 2H), 1.05 – 0.91 (m, 2H).

$^{13}\text{C}$  NMR (75 MHz, Chloroform-*d*)  $\delta$  136.27, 128.08, 121.88, 121.70, 119.24, 119.01, 115.53, 110.98, 38.80, 33.57, 33.13, 26.66, 26.40.

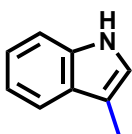

$^1\text{H}$  NMR (300 MHz, Chloroform-*d*)  $\delta$  7.83 (bs, 1H), 7.62 (ddd,  $J$  = 7.6, 1.4, 0.8 Hz, 1H), 7.41 – 7.32 (m, 1H), 7.27 – 7.12 (m, 2H), 6.97 (s, 1H), 2.37 (d,  $J$  = 1.1 Hz, 3H).

$^{13}\text{C}$  NMR (75 MHz, Chloroform-*d*)  $\delta$  136.30, 128.32, 121.90, 121.60, 119.15, 118.86, 111.76, 110.97, 9.69.

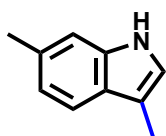

$^1\text{H}$  NMR (300 MHz, Chloroform-*d*)  $\delta$  7.69 (bs, 1H), 7.50 (d,  $J$  = 8.0 Hz, 1H), 7.15 – 7.13 (m, 1H), 7.00 (ddt,  $J$  = 7.6, 1.5, 0.6 Hz, 1H), 6.90 (dq,  $J$  = 2.2, 1.1 Hz, 1H), 2.51 (s, 3H), 2.36 (d,  $J$  = 1.1 Hz, 3H).

$^{13}\text{C}$  NMR (75 MHz, Chloroform-*d*)  $\delta$  136.76, 131.65, 126.22, 120.95, 120.92, 118.53, 111.56, 110.97, 21.76, 9.77.

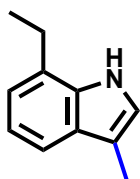

$^1\text{H}$  NMR (300 MHz, Chloroform-*d*)  $\delta$  7.81 (bs, 1H), 7.49 (ddq,  $J$  = 7.7, 1.2, 0.6 Hz, 1H), 6.98 (tq,  $J$  = 2.5, 1.1 Hz, 1H), 2.88 (qt,  $J$  = 7.5, 0.6 Hz, 2H), 2.38 (d,  $J$  = 1.1 Hz, 3H), 1.40 (t,  $J$  = 7.6 Hz, 3H).

$^{13}\text{C}$  NMR (75 MHz, Chloroform-*d*)  $\delta$  135.13, 128.07, 126.39, 121.24, 120.47, 119.49, 116.64, 112.22, 24.06, 13.91, 9.85.

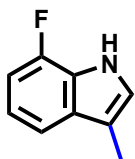

$^1\text{H}$  NMR (300 MHz, Chloroform-*d*)  $\delta$  8.04 (bs, 1H), 7.34 (dq,  $J = 7.9, 0.8$  Hz, 1H), 7.08 – 6.96 (m, 2H), 6.90 (dddd,  $J = 11.2, 7.8, 0.9, 0.4$  Hz, 1H), 2.34 (d,  $J = 1.1$  Hz, 3H).

$^{13}\text{C}$  NMR (75 MHz, Chloroform-*d*)  $\delta$  149.55 (d,  $J = 243.4$  Hz), 132.11, 122.25, 119.33 (d,  $J = 6.1$  Hz), 114.62 (d,  $J = 3.4$  Hz), 112.62, 106.83, 106.62, 9.74.

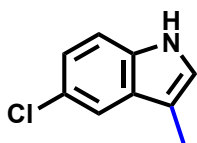

$^1\text{H}$  NMR (300 MHz, Chloroform-*d*)  $\delta$  7.86 (bs, 1H), 7.57 (dt,  $J = 2.0, 0.7$  Hz, 1H), 7.25 (dd,  $J = 8.6, 0.6$  Hz, 1H), 7.16 (ddd,  $J = 8.6, 2.0, 0.4$  Hz, 1H), 7.04 – 6.93 (m, 1H), 2.31 (d,  $J = 1.1$  Hz, 3H).

$^{13}\text{C}$  NMR (75 MHz, Chloroform-*d*)  $\delta$  134.60, 129.46, 124.89, 123.07, 122.14, 118.44, 111.98, 111.58, 9.57.

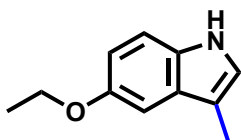

$^1\text{H}$  NMR (300 MHz, Chloroform-*d*)  $\delta$  7.78 (bs, 1H), 7.23 (dd,  $J = 8.8, 0.6$  Hz, 1H), 7.05 (d,  $J = 2.4$  Hz, 1H), 7.00 – 6.82 (m, 2H), 4.13 (q,  $J = 7.0$  Hz, 2H), 2.32 (d,  $J = 1.1$  Hz, 3H), 1.47 (t,  $J = 7.0$  Hz, 3H).

$^{13}\text{C}$  NMR (75 MHz, Chloroform-*d*)  $\delta$  153.11, 131.50, 128.68, 122.48, 112.64, 111.66, 111.39, 101.96, 64.33, 15.15, 9.76.

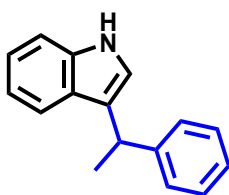

$^1\text{H}$  NMR (300 MHz, Chloroform-*d*)  $\delta$  7.86 (bs, 1H), 7.63 (ddt,  $J = 7.7, 1.6, 0.8$  Hz, 1H), 7.38 – 7.30 (m, 2H), 7.24 – 7.09 (m, 5H), 6.97 – 6.95 (m, 1H), 6.53 (ddd,  $J = 3.1, 2.1, 1.0$  Hz, 1H), 4.34 (qd,  $J = 7.2, 1.0$  Hz, 1H), 1.68 (d,  $J = 7.1$  Hz, 3H).

$^{13}\text{C}$  NMR (75 MHz, Chloroform-*d*)  $\delta$  146.85, 136.65, 128.35, 127.49, 125.96, 124.17, 122.00, 121.12, 120.77, 119.75, 119.24, 111.06, 102.65, 36.98, 22.45.

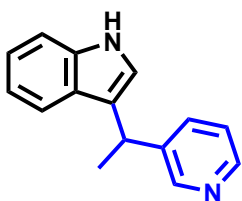

$^1\text{H}$  NMR (300 MHz, Chloroform-*d*)  $\delta$  8.62 (s, 1H), 8.44 (d,  $J = 4.7$  Hz, 1H), 8.24 (s, 1H), 7.56 (dt,  $J = 7.9, 1.8$  Hz, 1H), 7.42 – 7.28 (m, 2H), 7.24 – 7.11 (m, 2H), 7.09 – 6.93 (m, 2H), 4.41 (q,  $J = 7.3$  Hz, 1H), 1.73 (d,  $J = 7.2$  Hz, 3H).

$^{13}\text{C}$  NMR (75 MHz, Chloroform-*d*)  $\delta$  148.90, 147.07, 136.70, 135.26, 126.47, 123.55, 122.23, 121.27, 119.96, 119.44, 119.36, 111.22, 34.55, 22.11.

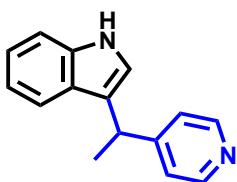

$^1\text{H}$  NMR (300 MHz, Chloroform-*d*)  $\delta$  8.56 – 8.40 (m, 2H), 8.17 (bs, 1H), 7.37 (dt,  $J = 8.2, 0.9$  Hz, 1H), 7.29 (ddt,  $J = 8.0, 1.5, 0.8$  Hz, 1H), 7.25 – 7.12 (m, 3H), 7.09 – 6.97 (m, 2H), 4.36 (q,  $J = 7.2$  Hz, 1H), 1.71 (d,  $J = 7.2$  Hz, 3H).

$^{13}\text{C}$  NMR (75 MHz, Chloroform-*d*)  $\delta$  149.37, 123.01, 122.32, 121.36, 119.51, 119.31, 111.23, 36.45, 21.56.

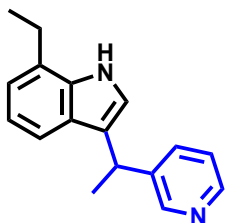

$^1\text{H}$  NMR (300 MHz, Chloroform-*d*)  $\delta$  8.62 (d,  $J = 2.3$  Hz, 1H), 8.44 (dd,  $J = 4.9, 1.7$  Hz, 1H), 8.11 (bs, 1H), 7.61 (dddd,  $J = 7.9, 2.2, 1.6, 0.6$  Hz, 1H), 7.26 – 7.13 (m, 2H), 7.09 – 6.91 (m, 3H), 4.42 (q,  $J = 7.2$  Hz, 1H), 2.86 (q,  $J = 7.6$  Hz, 2H), 1.73 (d,  $J = 7.2$  Hz, 3H), 1.36 (t,  $J = 7.6$  Hz, 3H).

$^{13}\text{C}$  NMR (75 MHz, Chloroform-*d*)  $\delta$  156.86, 148.29, 146.40, 138.47, 135.88, 126.61, 123.70, 120.86, 120.83, 120.28, 119.83, 117.04, 34.64, 23.99, 22.07, 13.79.

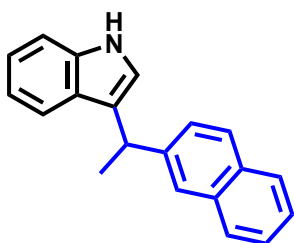

$^1\text{H}$  NMR (300 MHz, Chloroform-*d*)  $\delta$  7.98 (bs, 1H), 7.82 – 7.71 (m, 4H), 7.47 – 7.32 (m, 5H), 7.15 (ddd,  $J = 8.2, 7.0, 1.2$  Hz, 1H), 7.07 – 6.93 (m, 2H), 4.55 (q,  $J = 7.1$  Hz, 1H), 1.80 (d,  $J = 7.1$  Hz, 3H).

$^{13}\text{C}$  NMR (75 MHz, Chloroform-*d*)  $\delta$  144.32, 136.68, 133.65, 132.22, 127.91, 127.72, 127.58, 126.95, 126.56, 125.76, 125.30, 125.16, 122.01, 121.38, 121.22, 119.73, 119.27, 111.01, 37.09, 22.30.

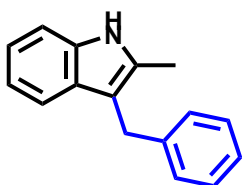

$^1\text{H}$  NMR (300 MHz, Chloroform-*d*)  $\delta$  7.80 (bs, 1H), 7.43 (ddt,  $J$  = 7.7, 1.5, 0.8 Hz, 1H), 7.33 – 7.25 (m, 5H), 7.21 – 7.11 (m, 2H), 7.10 – 7.05 (m, 1H), 4.11 (s, 2H), 2.41 (s, 3H).

$^{13}\text{C}$  NMR (75 MHz, Chloroform-*d*)  $\delta$  141.68, 135.31, 131.66, 128.93, 128.30, 127.18, 125.68, 121.02, 119.27, 118.40, 110.58, 110.15, 30.12, 11.83.

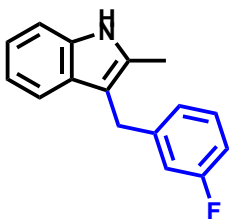

$^1\text{H}$  NMR (400 MHz, Chloroform-*d*)  $\delta$  7.64 (bs, 1H), 7.20 (dd,  $J$  = 7.8, 1.0 Hz, 1H), 7.12 (dt,  $J$  = 8.0, 0.9 Hz, 1H), 7.03 (td,  $J$  = 7.9, 6.0 Hz, 1H), 6.95 (ddd,  $J$  = 8.2, 7.1, 1.3 Hz, 1H), 6.90 – 6.83 (m, 2H), 6.74 – 6.64 (m, 2H), 3.90 (s, 2H), 2.22 (s, 3H).

$^{13}\text{C}$  NMR (101 MHz, Chloroform-*d*)  $\delta$  163.03 (d,  $J$  = 245.1 Hz), 144.38 (d,  $J$  = 6.9 Hz), 135.31, 131.80, 129.62 (d,  $J$  = 8.2 Hz), 128.73, 123.89 (d,  $J$  = 2.7 Hz), 121.17, 119.40, 118.22, 115.08 (d,  $J$  = 21.3 Hz), 112.58 (d,  $J$  = 21.1 Hz), 110.22, 109.89, 29.86 (d,  $J$  = 1.8 Hz), 11.79.

$^{19}\text{F}$  NMR (282 MHz, Chloroform-*d*)  $\delta$  -113.88 (ddd,  $J$  = 10.1, 8.8, 6.0 Hz).

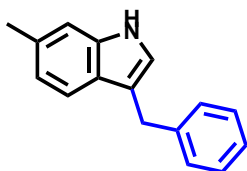

$^1\text{H}$  NMR (400 MHz, Chloroform-*d*)  $\delta$  7.72 (bs, 1H), 7.38 (d,  $J$  = 8.1 Hz, 1H), 7.30 – 7.15 (m, 5H), 7.11 (dt,  $J$  = 1.5, 0.8 Hz, 1H), 6.91 (dd,  $J$  = 8.2, 1.4 Hz, 1H), 6.80 (dt,  $J$  = 2.1, 1.0 Hz, 1H), 4.09 (d,  $J$  = 1.0 Hz, 2H), 2.45 (s, 3H).

$^{13}\text{C}$  NMR (101 MHz, Chloroform-*d*)  $\delta$  141.38, 136.96, 131.87, 128.71, 128.35, 125.87, 125.40, 121.75, 121.16, 118.87, 115.64, 111.09, 31.69, 21.76.

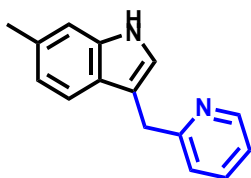

$^1\text{H}$  NMR (300 MHz, Chloroform-*d*)  $\delta$  8.56 (ddd,  $J$  = 4.9, 1.9, 0.9 Hz, 1H), 8.08 (bs, 1H), 7.54 (td,  $J$  = 7.7, 1.9 Hz, 1H), 7.43 – 7.33 (m, 1H), 7.22 – 7.05 (m, 3H), 7.05 – 6.97 (m, 1H), 6.91 (ddd,  $J$  = 8.1, 1.5, 0.6 Hz, 1H), 4.30 (d,  $J$  = 0.8 Hz, 2H), 2.44 (t,  $J$  = 0.7 Hz, 3H).

$^{13}\text{C}$  NMR (75 MHz, Chloroform-*d*)  $\delta$  161.27, 148.79, 136.95, 136.74, 131.91, 125.28, 122.88, 122.12, 121.22, 121.14, 118.82, 113.52, 111.13, 34.44, 21.70.

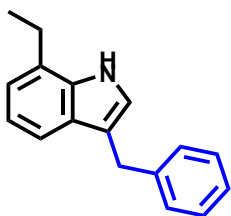

$^1\text{H}$  NMR (300 MHz, Chloroform-*d*)  $\delta$  7.88 (bs, 1H), 7.55 – 7.12 (m, 6H), 7.09 – 6.99 (m, 2H), 6.89 (dt,  $J = 2.2, 1.0$  Hz, 1H), 4.10 (d,  $J = 1.0$  Hz, 2H), 2.84 (qd,  $J = 7.6, 0.8$  Hz, 2H), 1.36 (td,  $J = 7.6, 4.3$  Hz, 3H).

$^{13}\text{C}$  NMR (75 MHz, Chloroform-*d*)  $\delta$  141.30, 135.31, 128.73, 128.33, 127.23, 126.44, 125.86, 121.94, 120.60, 119.69, 116.94, 116.35, 31.74, 24.02, 13.83.

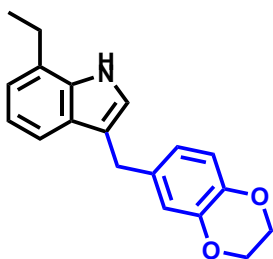

$^1\text{H}$  NMR (300 MHz, Chloroform-*d*)  $\delta$  7.91 (bs, 1H), 7.45 (dd,  $J = 7.2, 2.0$  Hz, 1H), 7.19 – 6.99 (m, 2H), 6.99 – 6.72 (m, 4H), 4.24 (s, 4H), 4.05 (q,  $J = 1.0$  Hz, 2H), 2.87 (q,  $J = 7.6$  Hz, 2H), 1.40 (td,  $J = 7.6, 1.1$  Hz, 3H).

$^{13}\text{C}$  NMR (75 MHz, Chloroform-*d*)  $\delta$  143.33, 141.72, 135.35, 134.83, 127.23, 126.49, 121.94, 121.66, 120.58, 119.70, 117.40, 117.02, 116.97, 116.40, 64.44, 64.37, 31.02, 24.04, 13.91.

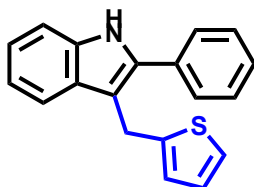

$^1\text{H}$  NMR (300 MHz, Chloroform-*d*)  $\delta$  8.22 – 8.02 (m, 1H), 7.60 – 7.52 (m, 3H), 7.50 – 7.37 (m, 4H), 7.22 (ddd,  $J = 8.1, 7.1, 1.2$  Hz, 1H), 7.15 – 7.08 (m, 2H), 6.91 (dd,  $J = 5.1, 3.4$  Hz, 1H), 6.83 (dq,  $J = 3.5, 1.2$  Hz, 1H), 4.40 (d,  $J = 1.2$  Hz, 2H).

$^{13}\text{C}$  NMR (75 MHz, Chloroform-*d*)  $\delta$  145.37, 135.93, 132.70, 128.97, 127.96, 127.94, 126.79, 124.39, 123.30, 122.52, 119.92, 119.46, 111.22, 110.82, 91.81, 25.34.

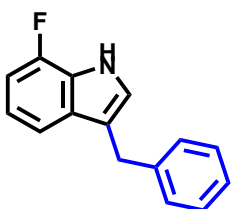

$^1\text{H}$  NMR (400 MHz, Chloroform-*d*)  $\delta$  8.09 (bs, 1H), 7.35 – 7.27 (m, 5H), 7.26 – 7.20 (m, 1H), 7.01 (tdd,  $J = 7.9, 4.8, 0.9$  Hz, 1H), 6.97 – 6.89 (m, 2H), 4.13 (s, 2H).

$^{13}\text{C}$  NMR (101 MHz, Chloroform-*d*)  $\delta$  149.59 (d,  $J = 243.7$  Hz), 140.87, 131.22 (d,  $J = 5.1$  Hz), 128.69, 128.45, 126.07, 124.78 (d,  $J = 13.1$  Hz), 123.04, 119.66 (d,  $J = 6.1$  Hz), 116.71 (d,  $J = 2.3$  Hz), 114.99 (d,  $J = 3.5$  Hz), 106.93 (d,  $J = 16.1$  Hz), 31.63.

$^{19}\text{F}$  NMR (376 MHz, Chloroform-*d*)  $\delta$  -135.43 – -135.51 (m).

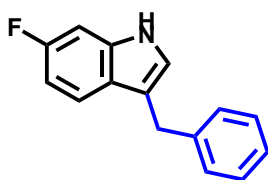

$^1\text{H}$  NMR (300 MHz, Chloroform-*d*)  $\delta$  7.89 (bs, 1H), 7.38 (ddt,  $J$  = 8.6, 5.3, 0.6 Hz, 1H), 7.32 – 7.14 (m, 5H), 7.01 (ddd,  $J$  = 9.7, 2.3, 0.5 Hz, 1H), 6.90 – 6.75 (m, 2H), 4.08 (d,  $J$  = 1.0 Hz, 2H).

$^{13}\text{C}$  NMR (75 MHz, Chloroform-*d*)  $\delta$  160.06 (d,  $J$  = 237.5 Hz), 140.92, 136.29, 128.65, 128.40, 126.02, 122.56 (d,  $J$  = 3.6 Hz), 119.90 (d,  $J$  = 10.2 Hz), 115.96, 108.14 (d,  $J$  = 24.5 Hz), 97.38 (d,  $J$  = 26.0 Hz), 31.59.

$^{19}\text{F}$  NMR (282 MHz, Chloroform-*d*)  $\delta$  -121.26, -121.29 (d,  $J$  = 4.1 Hz), -121.33 (d,  $J$  = 4.1 Hz), -121.35, -121.38.

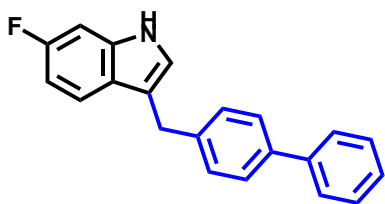

$^1\text{H}$  NMR (300 MHz, DMSO-*d*<sub>6</sub>)  $\delta$  10.96 (bs, 1H), 7.65 – 7.53 (m, 4H), 7.47 – 7.40 (m, 3H), 7.39 – 7.29 (m, 3H), 7.24 – 7.19 (m, 1H), 7.13 (ddd,  $J$  = 10.2, 2.4, 0.5 Hz, 1H), 6.81 (ddd,  $J$  = 9.8, 8.7, 2.4 Hz, 1H), 4.07 (s, 2H).

$^{13}\text{C}$  NMR (75 MHz, DMSO-*d*<sub>6</sub>)  $\delta$  159.32 (d,  $J$  = 233.8 Hz), 141.39, 140.56, 138.11, 136.80, 136.63, 129.38 (d,  $J$  = 7.4 Hz), 127.60, 126.98 (d,  $J$  = 4.5 Hz), 124.33, 124.26 (d,  $J$  = 3.6 Hz), 119.98 (d,  $J$  = 10.2 Hz), 114.44, 107.41, 107.09, 97.82 (d,  $J$  = 25.4 Hz), 31.00.

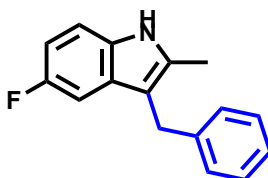

$^1\text{H}$  NMR (300 MHz, Chloroform-*d*)  $\delta$  7.77 (bs, 1H), 7.27 – 7.14 (m, 6H), 7.02 (dd,  $J$  = 9.8, 2.5 Hz, 1H), 6.83 (ddd,  $J$  = 9.4, 8.7, 2.5 Hz, 1H), 4.02 (s, 2H), 2.39 (s, 3H).

$^{13}\text{C}$  NMR (75 MHz, Chloroform-*d*)  $\delta$   $^{13}\text{C}$  NMR (75 MHz, CDCl<sub>3</sub>)  $\delta$  157.81 (d,  $J$  = 233.6 Hz), 141.22, 133.66, 131.73, 128.38, 128.21, 125.84, 110.59 (d,  $J$  = 9.7 Hz), 109.19, 108.84, 103.47 (d,  $J$  = 23.5 Hz), 30.13, 11.95.

$^{19}\text{F}$  NMR (282 MHz, Chloroform-*d*)  $\delta$  -125.02 (td,  $J$  = 9.5, 4.4 Hz).

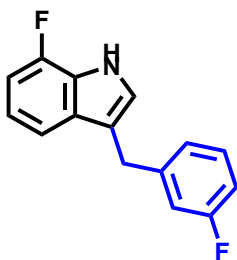

$^1\text{H}$  NMR (400 MHz, Chloroform-*d*)  $\delta$  8.15 (bs, 1H), 7.29 – 7.21 (m, 2H), 7.07 (ddd,  $J$  = 7.6, 1.7, 0.9 Hz, 1H), 7.04 – 6.85 (m, 5H), 4.11 (t,  $J$  = 0.7 Hz, 2H).



$^{13}\text{C}$  NMR (101 MHz, Chloroform-*d*)  $\delta$  163.02 (d,  $J = 245.2$  Hz), 149.59 (d,  $J = 243.7$  Hz), 143.51 (d,  $J = 7.1$  Hz), 131.02 (d,  $J = 5.1$  Hz), 129.78 (d,  $J = 8.4$  Hz), 124.80 (d,  $J = 13.0$  Hz), 124.25 (d,  $J = 2.8$  Hz), 123.11, 119.79 (d,  $J = 6.1$  Hz), 115.84 (d,  $J = 2.2$  Hz), 115.60, 115.39, 114.85 (d,  $J = 3.5$  Hz), 112.96 (d,  $J = 21.1$  Hz), 107.05 (d,  $J = 16.1$  Hz), 31.35.

$^{19}\text{F}$  NMR (376 MHz, Chloroform-*d*)  $\delta$  -113.56 – -113.74 (m), -135.41 (dt,  $J = 11.1, 4.1$  Hz).

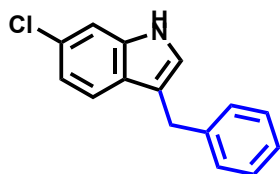

$^1\text{H}$  NMR (300 MHz, Chloroform-*d*)  $\delta$  7.95 (bs, 1H), 7.39 (dt,  $J = 8.4, 0.6$  Hz, 1H), 7.35 (dd,  $J = 1.8, 0.6$  Hz, 1H), 7.30 – 7.22 (m, 5H), 7.03 (dd,  $J = 8.4, 1.8$  Hz, 1H), 6.92 (dt,  $J = 2.2, 1.0$  Hz, 1H), 4.08 (dt,  $J = 1.0, 0.6$  Hz, 2H).

$^{13}\text{C}$  NMR (101 MHz, Chloroform-*d*)  $\delta$  140.82, 136.80, 128.62, 128.41, 128.03, 126.09, 126.04, 122.96, 120.14, 120.07, 116.02, 111.01, 31.49.

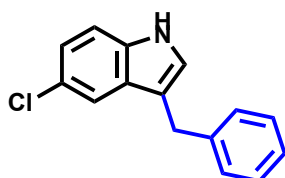

$^1\text{H}$  NMR (400 MHz, Chloroform-*d*)  $\delta$  7.93 (bs, 1H), 7.54 (dq,  $J = 7.9, 0.9$  Hz, 1H), 7.37 (dt,  $J = 8.2, 0.9$  Hz, 1H), 7.31 – 7.28 (m, 3H), 7.23 – 7.17 (m, 2H), 7.09 (ddd,  $J = 8.0, 7.0, 1.0$  Hz, 1H), 6.92 (dt,  $J = 2.3, 1.0$  Hz, 1H), 4.13 (d,  $J = 1.0$  Hz, 2H).

$^{13}\text{C}$  NMR (101 MHz, Chloroform-*d*)  $\delta$  141.22, 136.46, 128.71, 128.34, 127.48, 125.89, 122.33, 122.07, 119.38, 119.18, 115.87, 111.08, 31.61.

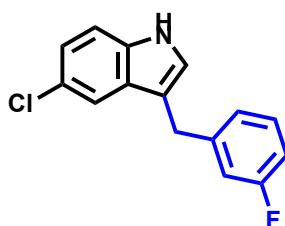

$^1\text{H}$  NMR (300 MHz, Chloroform-*d*)  $\delta$  8.00 (bs, 1H), 7.43 (dt,  $J = 2.0, 0.7$  Hz, 1H), 7.28 – 7.21 (m, 2H), 7.13 (ddd,  $J = 8.6, 2.0, 0.4$  Hz, 1H), 7.03 (ddq,  $J = 7.6, 1.6, 0.8$  Hz, 1H), 6.98 – 6.95 (m, 1H), 6.95 – 6.84 (m, 2H), 4.05 (p,  $J = 0.7$  Hz, 2H).

$^{13}\text{C}$  NMR (75 MHz,  $\text{CDCl}_3$ )  $\delta$  163.03 (d,  $J = 245.7$  Hz), 143.41, 134.80, 129.81 (d,  $J = 8.2$  Hz), 128.43, 125.30, 124.20 (d,  $J = 2.8$  Hz), 123.83, 122.55, 118.54, 115.56, 115.28, 114.80, 113.13, 112.86, 112.16, 31.14 (d,  $J = 1.7$  Hz).

$^{19}\text{F}$  NMR (282 MHz, Chloroform-*d*)  $\delta$  -113.61 (d,  $J = 4.0$  Hz), -113.62 – -113.66 (m), -113.67.

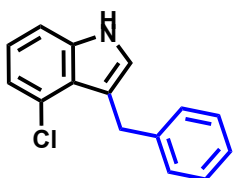

$^1\text{H}$  NMR (300 MHz, Chloroform-*d*)  $\delta$  7.95 (bs, 1H), 7.53 (ddt,  $J = 7.9, 1.3, 0.7$  Hz, 1H), 7.39 – 7.34 (m, 1H), 7.32 – 7.26 (m, 3H), 7.23 – 7.17 (m, 2H), 7.12 – 7.05 (m, 1H), 6.92 (dt,  $J = 2.2, 0.9$  Hz, 1H), 4.45 – 3.92 (m, 2H).

$^{13}\text{C}$  NMR (75 MHz, Chloroform-*d*)  $\delta$  141.21, 136.47, 128.70, 128.33, 125.88, 122.32, 122.06, 119.37, 119.17, 115.88, 111.06, 31.61.

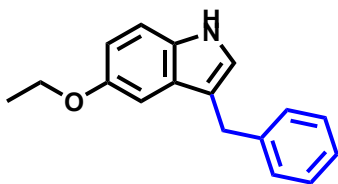

$^1\text{H}$  NMR (300 MHz, Chloroform-*d*)  $\delta$  7.85 (bs, 1H), 7.42 – 7.15 (m, 6H), 7.03 (dt,  $J = 2.5, 0.6$  Hz, 1H), 6.95 – 6.86 (m, 2H), 4.15 – 4.13 (m, 2H), 4.09 (q,  $J = 7.0$  Hz, 2H), 1.47 (t,  $J = 7.0$  Hz, 3H).

$^{13}\text{C}$  NMR (75 MHz, Chloroform-*d*)  $\delta$  153.16, 141.26, 131.70, 128.75, 128.41, 127.95, 125.94, 123.27, 115.44, 112.73, 111.83, 102.29, 64.28, 31.67, 15.11.

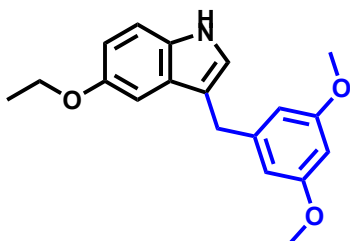

$^1\text{H}$  NMR (300 MHz, Chloroform-*d*)  $\delta$  7.92 (bs, 1H), 7.24 (dd,  $J = 8.7, 0.6$  Hz, 1H), 7.03 (dd,  $J = 2.5, 0.6$  Hz, 1H), 6.97 – 6.81 (m, 2H), 6.49 (dt,  $J = 2.3, 0.6$  Hz, 2H), 6.34 (t,  $J = 2.3$  Hz, 1H), 4.13 – 4.03 (m, 4H), 3.78 (s, 6H), 1.45 (t,  $J = 7.0$  Hz, 3H).

$^{13}\text{C}$  NMR (75 MHz, Chloroform-*d*)  $\delta$  160.78, 153.16, 143.72, 131.65, 127.92, 123.25, 115.02, 112.71, 111.76, 106.91, 106.39, 102.19, 97.88, 64.26, 55.28, 31.90, 15.08.

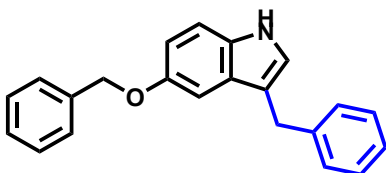

$^1\text{H}$  NMR (400 MHz, Chloroform-*d*)  $\delta$  7.70 (bs, 1H), 7.41 – 7.32 (m, 2H), 7.32 – 7.25 (m, 2H), 7.25 – 7.15 (m, 5H), 7.14 – 7.09 (m, 2H), 6.96 (dd,  $J = 2.5, 0.6$  Hz, 1H), 6.88 – 6.79 (m, 1H), 6.78 – 6.73 (m, 1H), 4.96 (s, 2H), 3.98 (d,  $J = 0.9$  Hz, 2H).

$^{13}\text{C}$  NMR (101 MHz, Chloroform-*d*)  $\delta$  153.14, 141.20, 137.72, 131.83, 128.73, 128.56, 128.41, 127.89, 127.83, 127.71, 125.94, 123.30, 115.56, 112.91, 111.84, 102.78, 71.00, 31.67.

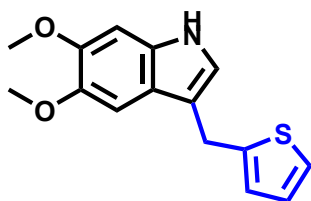

$^1\text{H}$  NMR (400 MHz, Chloroform-*d*)  $\delta$  7.94 (bs, 1H), 7.13 (dd,  $J$  = 5.1, 1.2 Hz, 1H), 6.98 (s, 1H), 6.96 – 6.86 (m, 3H), 6.83 (s, 1H), 4.28 (d,  $J$  = 1.0 Hz, 2H), 3.89 (s, 3H), 3.88 (s, 3H).

$^{13}\text{C}$  NMR (101 MHz, Chloroform-*d*)  $\delta$  147.13, 144.88, 144.83, 130.69, 126.73, 124.68, 123.42, 120.91, 119.93, 114.97, 100.83, 94.70, 56.39, 56.18, 26.11.

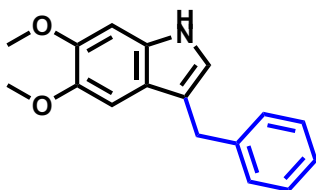

$^1\text{H}$  NMR (300 MHz, Chloroform-*d*)  $\delta$  7.81 (bs, 1H), 7.29 – 7.08 (m, 5H), 6.86 (s, 1H), 6.76 (s, 1H), 6.71 (dt,  $J$  = 2.1, 1.0 Hz, 1H), 4.02 (d,  $J$  = 0.9 Hz, 2H), 3.81 (s, 3H), 3.80 (s, 3H).

$^{13}\text{C}$  NMR (75 MHz, Chloroform-*d*)  $\delta$  147.07, 144.81, 141.27, 130.75, 128.71, 128.37, 125.92, 121.02, 120.30, 115.52, 100.97, 94.66, 56.38, 56.20, 31.76.

# S7 NMR spectra

210408.301.10.fid  
Bei Zhou Bei 21-4  
Au1H CDCl3 {C:\Bruker\TopSpin3.6.2} 2104 1

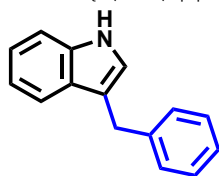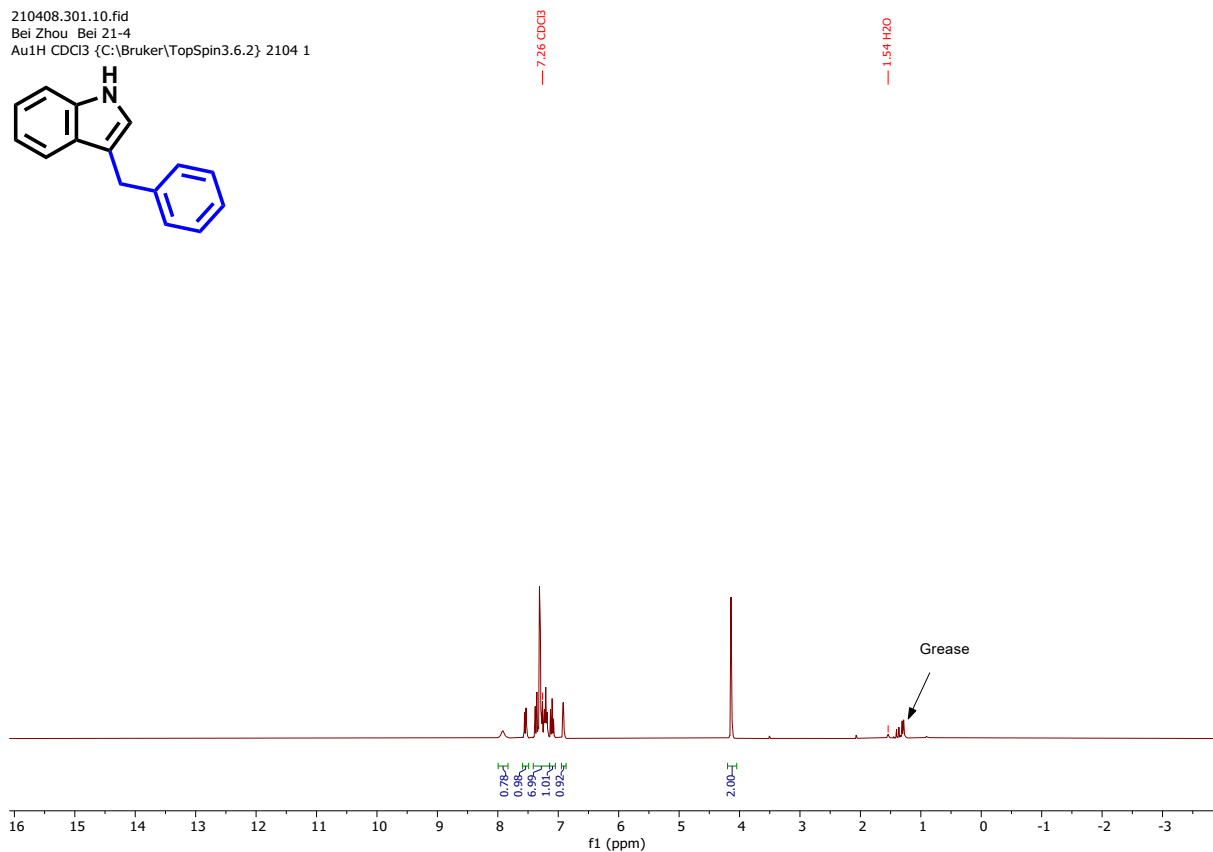

210408.301.11.fid  
Bei Zhou Bei 21-4  
Au13C CDCl3 {C:\Bruker\TopSpin3.6.2} 2104 1

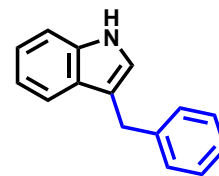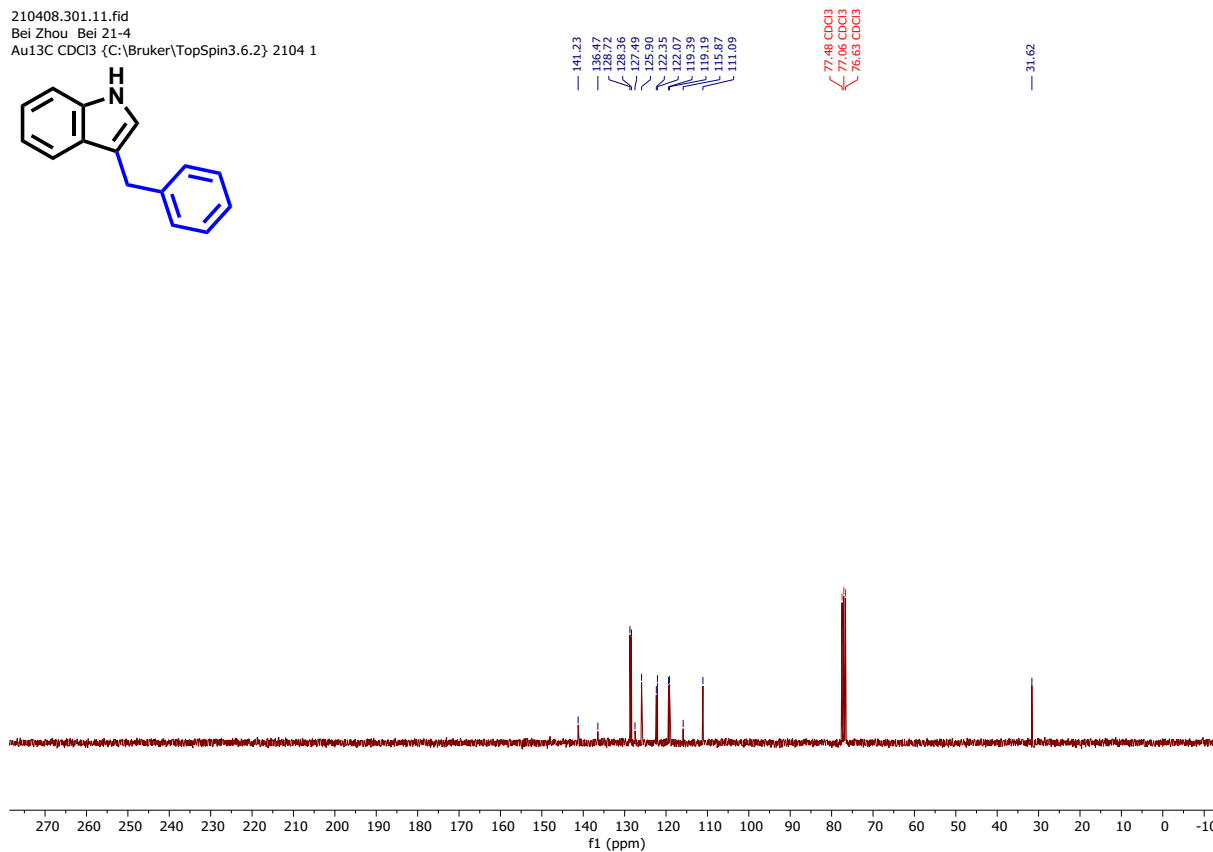

210322.313.10.fid  
Bei Zhou / Bei 21-34-2  
Au1H CDCl3 {C:\Bruker\TopSpin3.6.2} 2103 13

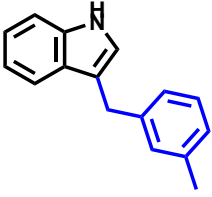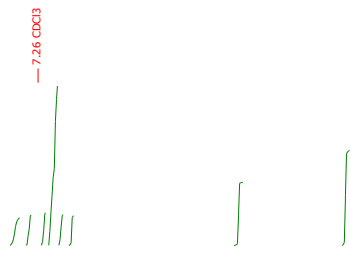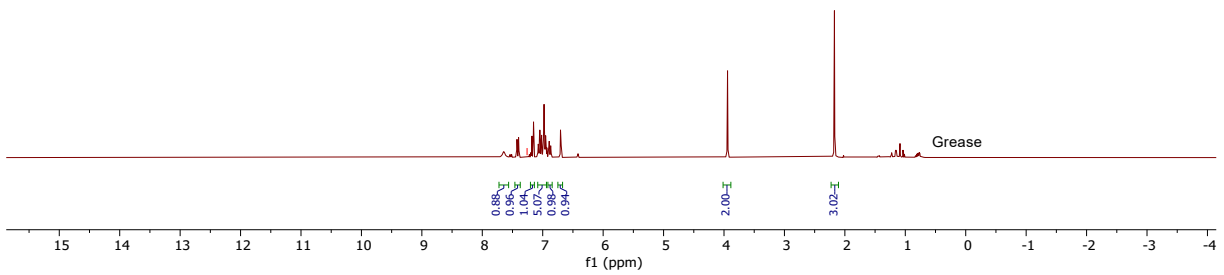

210322.313.11.fid  
Bei Zhou / Bei 21-34-2  
Au13C CDCl3 {C:\Bruker\TopSpin3.6.2} 2103 13

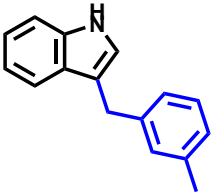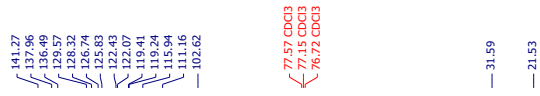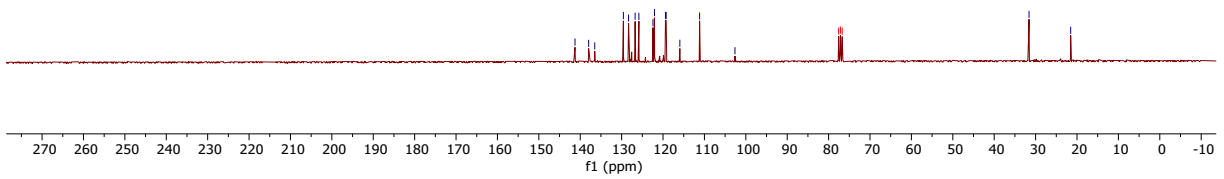

210525.429.10.fid  
Zhou/ Bei 21-45  
Au1H CDCl3 {C:\Bruker\TopSpin3.5pl6} 2105 29

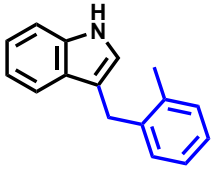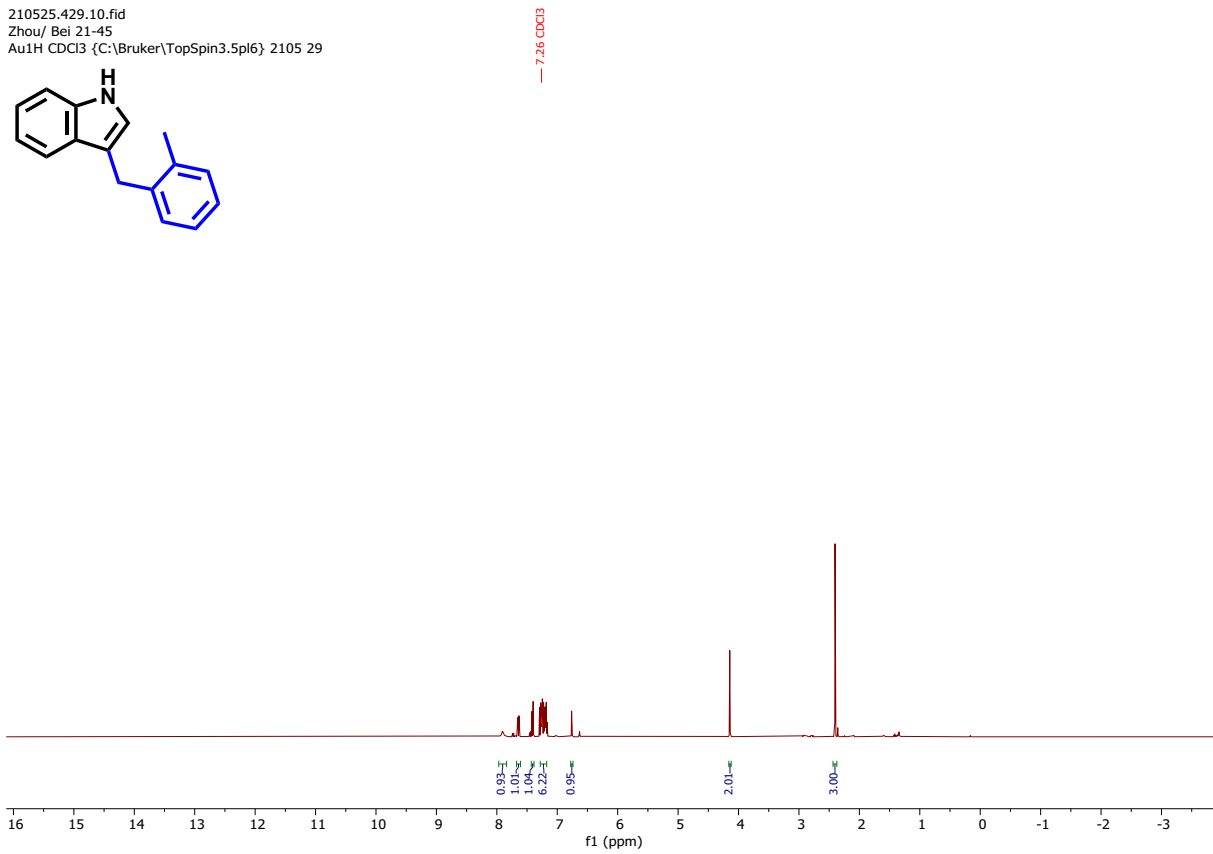

210525.429.11.fid  
Zhou/ Bei 21-45  
Au13C CDCl3 {C:\Bruker\TopSpin3.5pl6} 2105 29

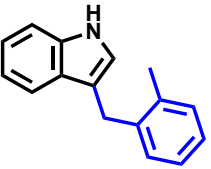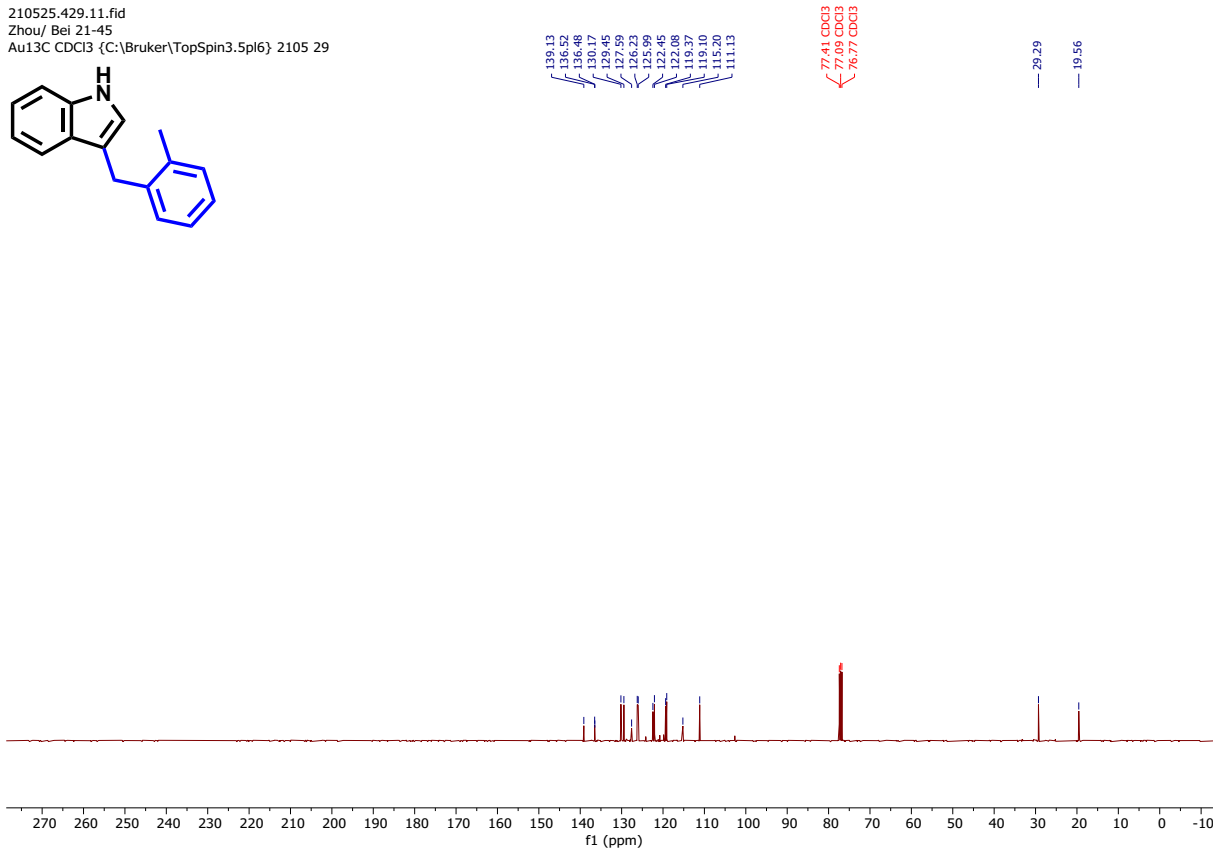



210525.430.10.fid  
Zhou/ Bei 21-53  
Au1H CDCl3 {C:\Bruker\TopSpin3.5pl6} 2105 30

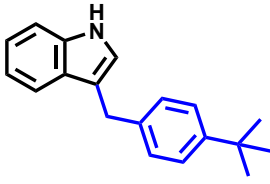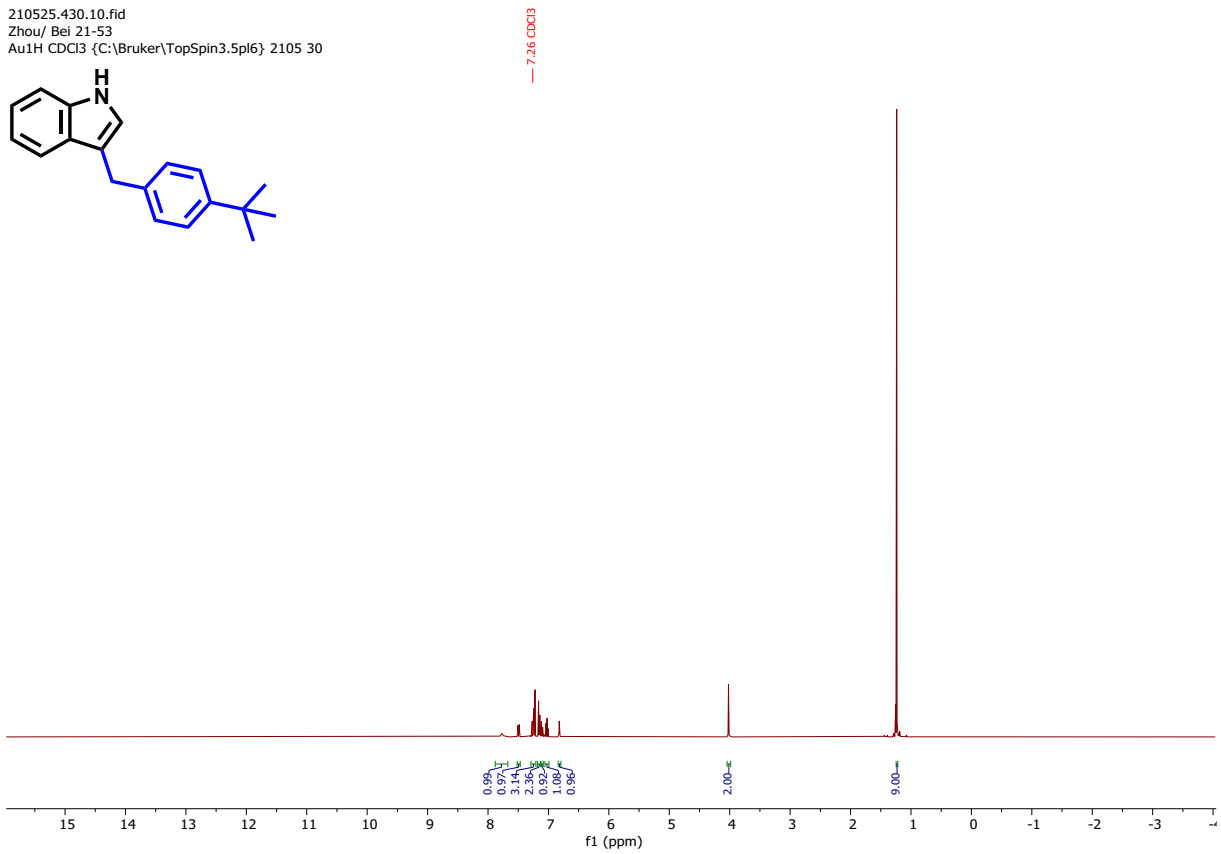

210525.430.11.fid  
Zhou/ Bei 21-53  
Au13C CDCl3 {C:\Bruker\TopSpin3.5pl6} 2105 30

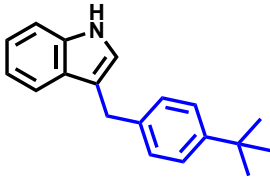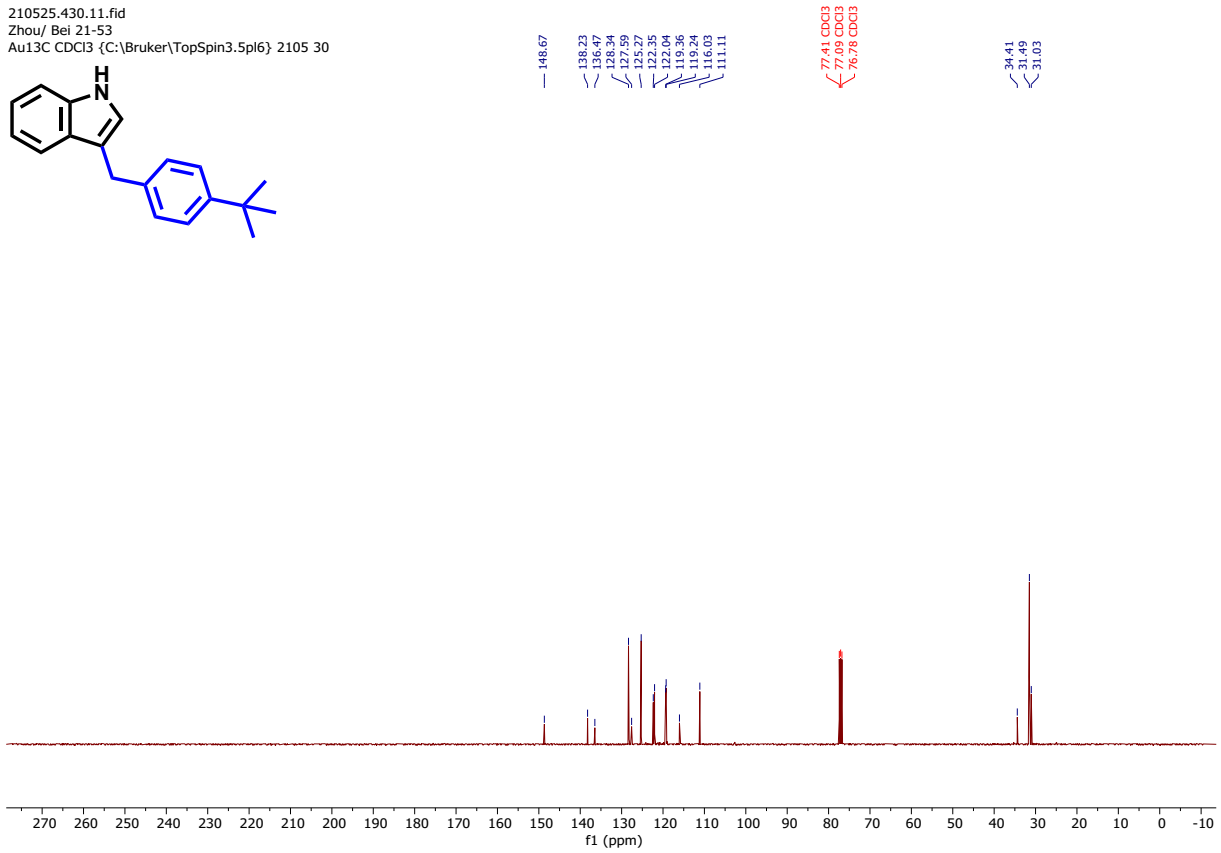

210908.306.10.fid  
Bei Zhou 21-33-1  
Au1H DMSO {C:\Bruker\TopSpin3.6.2} 2109 6

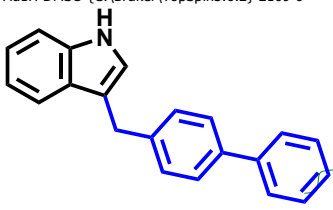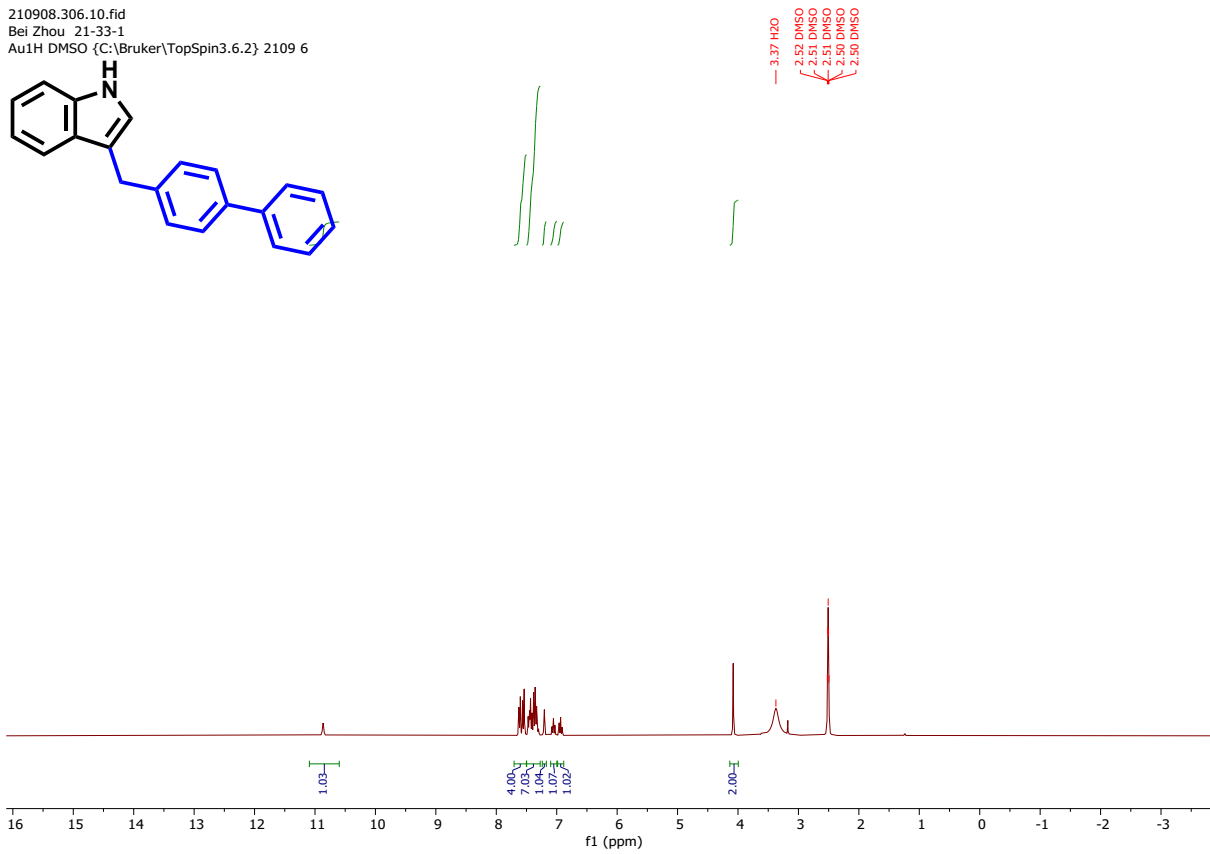

210908.306.11.fid  
Bei Zhou 21-33-1  
Au13C DMSO {C:\Bruker\TopSpin3.6.2} 2109 6

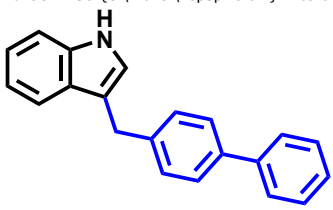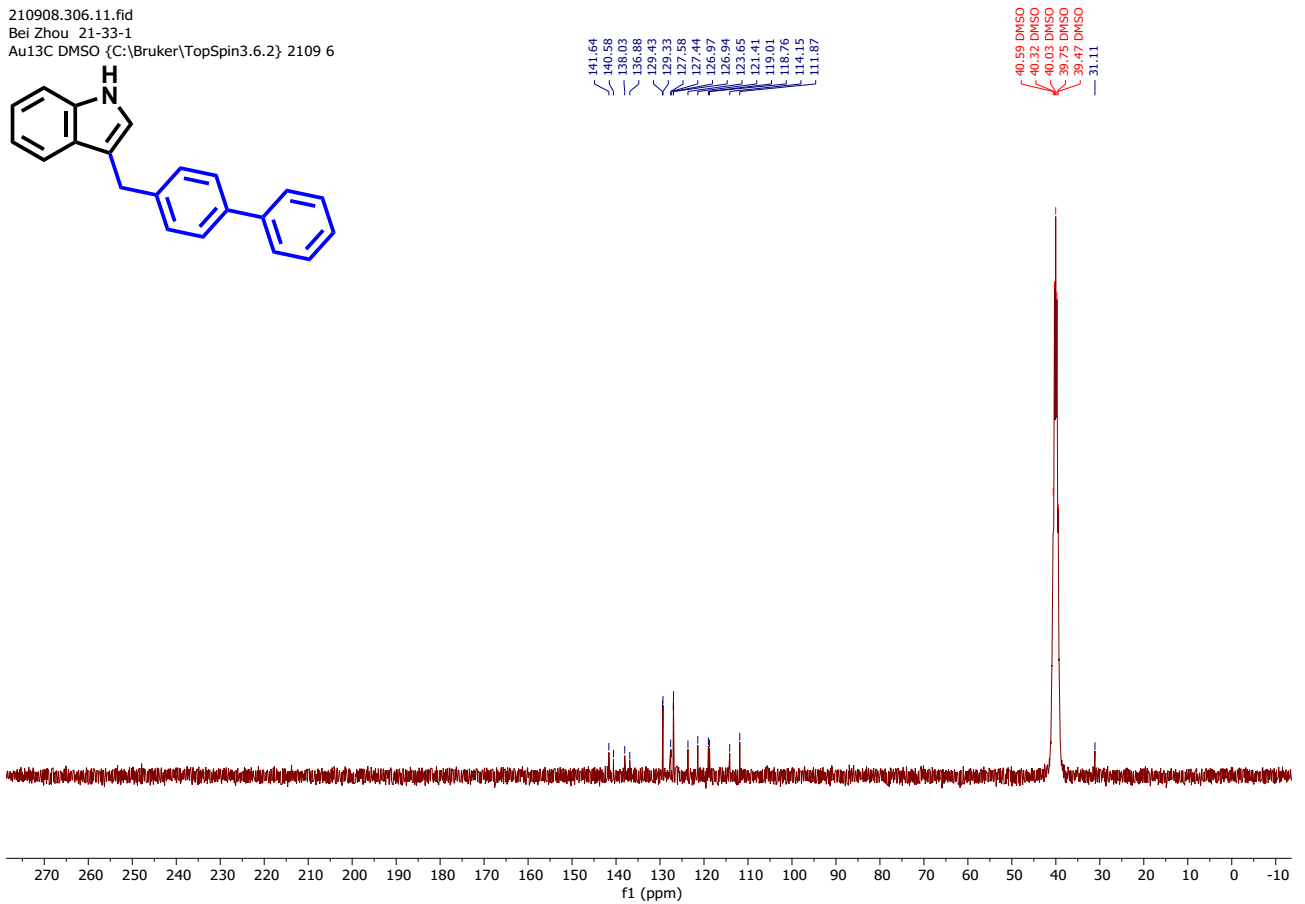

210525.434.10.fid  
Zhou/ Bei 21-42  
Au1H DMSO {C:\Bruker\TopSpin3.5pl6} 2105 34

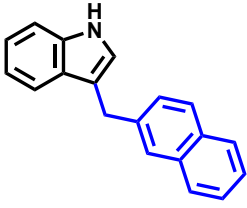

3.40 H2O  
2.52 DMSO  
2.51 DMSO  
2.51 DMSO  
2.50 DMSO  
2.28 DMSO

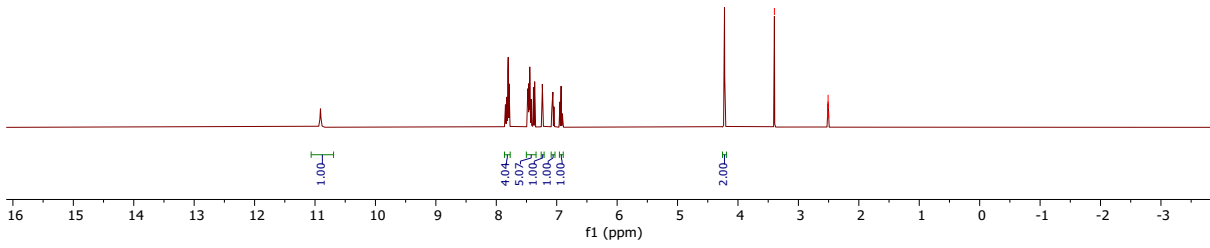

210525.434.11.fid  
Zhou/ Bei 21-42  
Au13C DMSO {C:\Bruker\TopSpin3.5pl6} 2105 34

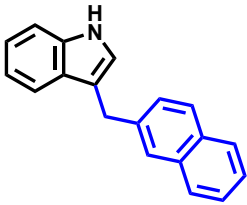

138.94  
136.94  
133.63  
132.03  
128.09  
128.05  
127.76  
127.52  
126.54  
126.41  
125.63  
123.78  
121.44  
118.76  
118.72  
114.13  
111.91

40.62 DMSO  
40.41 DMSO  
40.20 DMSO  
40.10 DMSO  
39.79 DMSO  
39.59 DMSO  
39.37 DMSO  
31.79

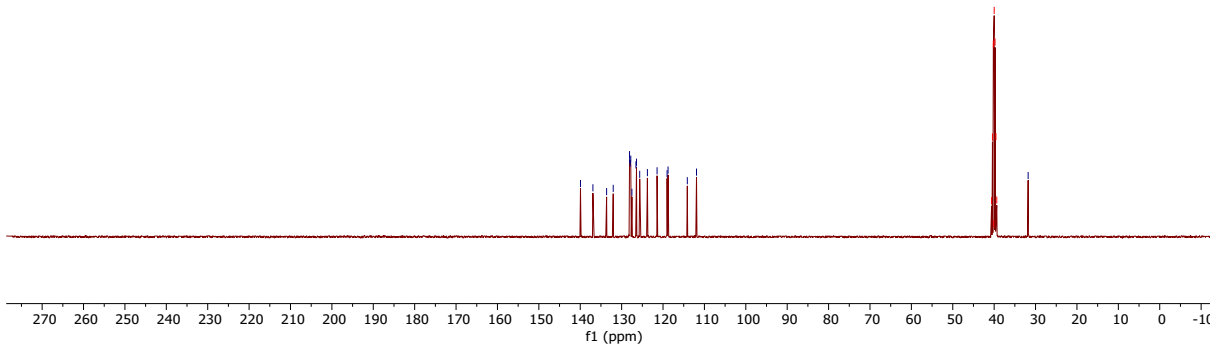

210531.317.10.fid  
Bei Zhou Bei 21-47  
Au1H CDCl3 {C:\Bruker\TopSpin3.6.2} 2105 17

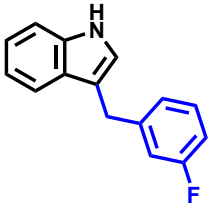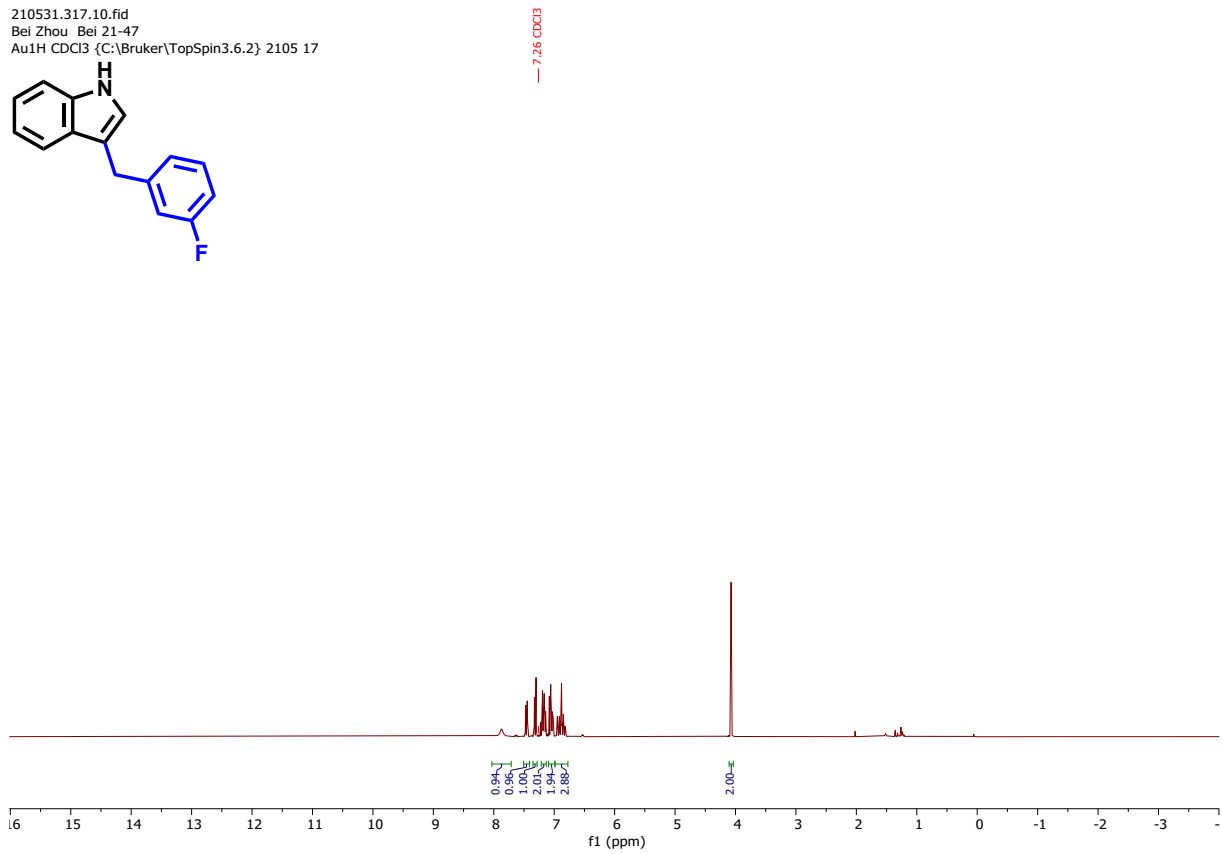

210531.317.11.fid  
Bei Zhou Bei 21-47  
Au13C CDCl3 {C:\Bruker\TopSpin3.6.2} 2105 17

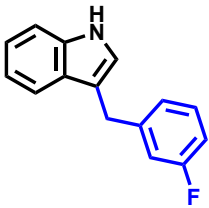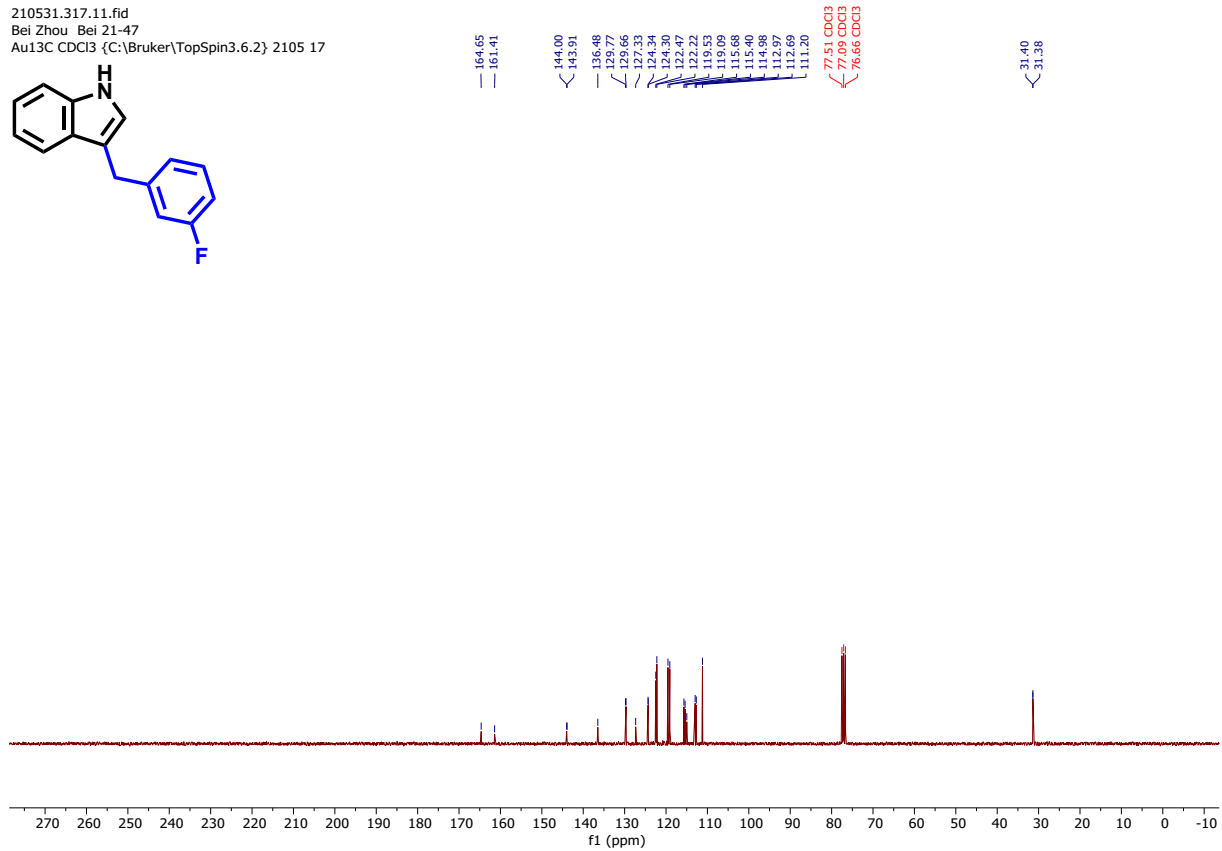

210608.457.10.fid  
Bei Zhou Bei 21-47  
F19 CDCl3 {C:\Bruker\TopSpin3.5pl6} 2106 57

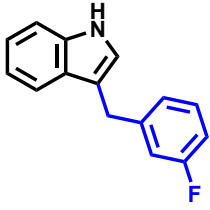

-113.72  
-113.74  
-113.75  
-113.76  
-113.78  
-113.79

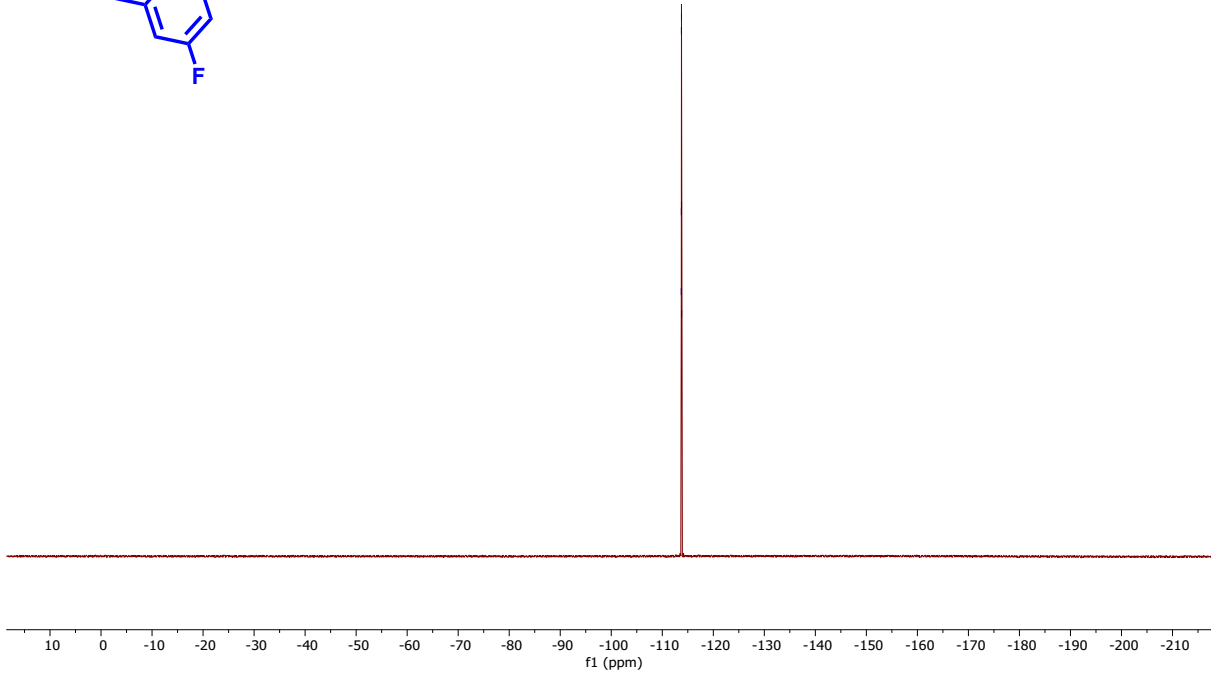

210316.330.10.fid  
Bei Zhou Bei 21-28-3  
Au1H CDCl3 {C:\Bruker\TopSpin3.6.2} 2103 30

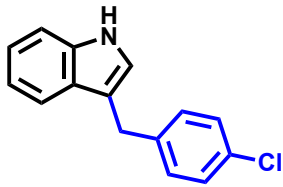

7.26 CDCl3

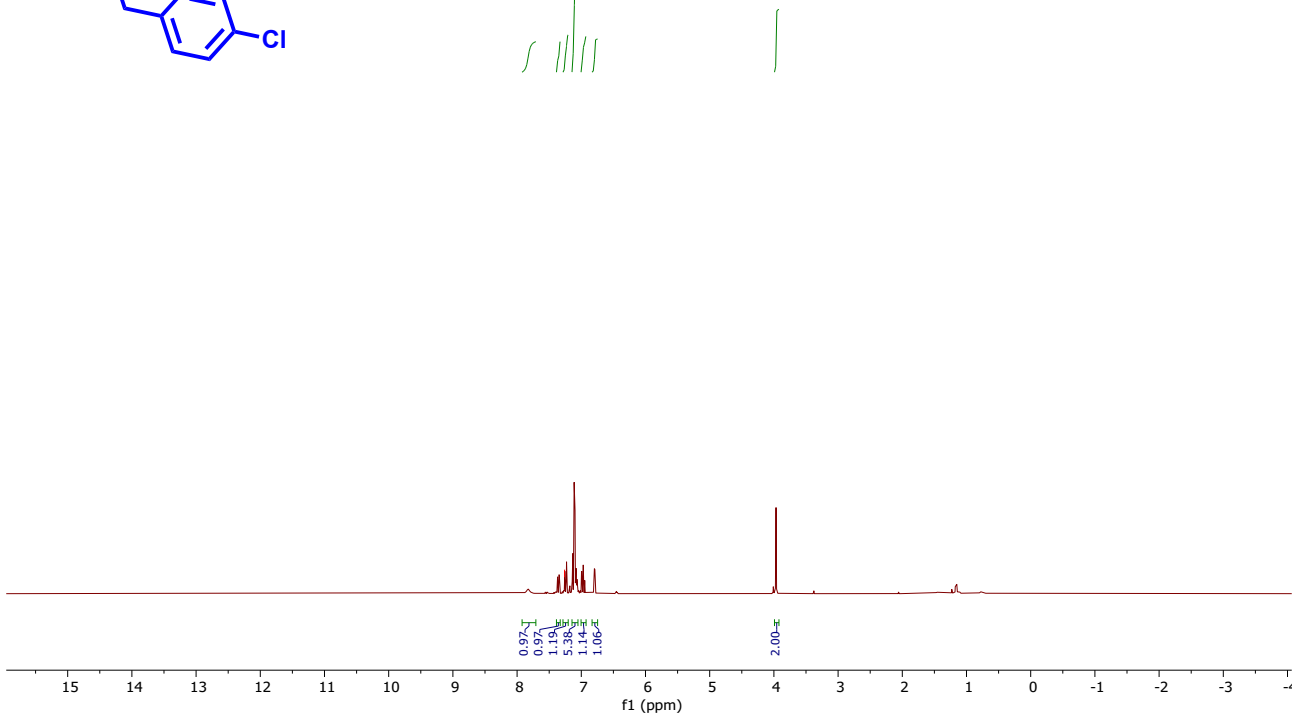

210316.330.11.fid  
Bei Zhou Bei 21-28-3  
Au13C CDCl3 {C:\Bruker\TopSpin3.6.2} 2103 30

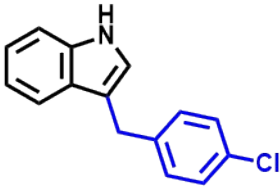

139.70  
136.48  
131.61  
130.92  
128.44  
127.28  
122.38  
122.22  
119.50  
119.07  
115.28  
111.17

77.48 CDCl3  
77.06 CDCl3  
76.64 CDCl3

— 31.02

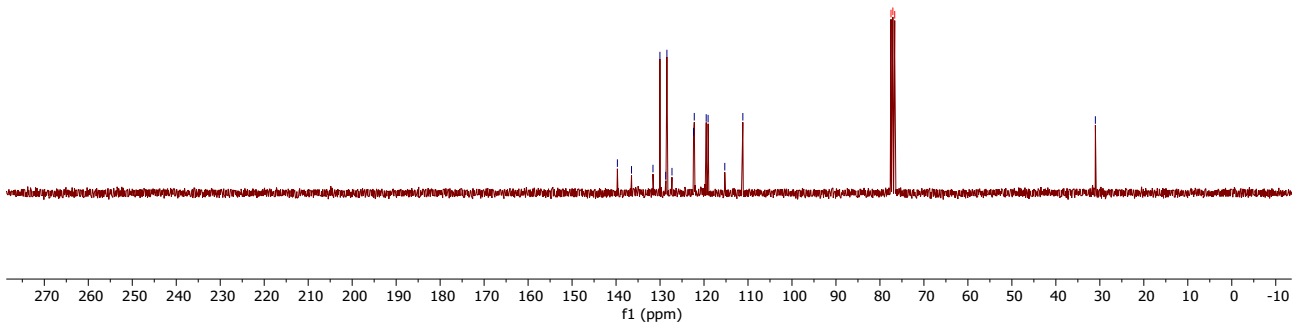

210427.439.10.fid  
Bei Zhou Bei 21-49-1  
Au1H CDCl3 {C:\Bruker\TopSpin3.5pl6} 2104 39

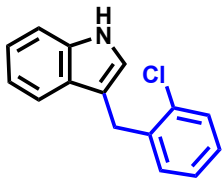

— 7.26 CDCl3

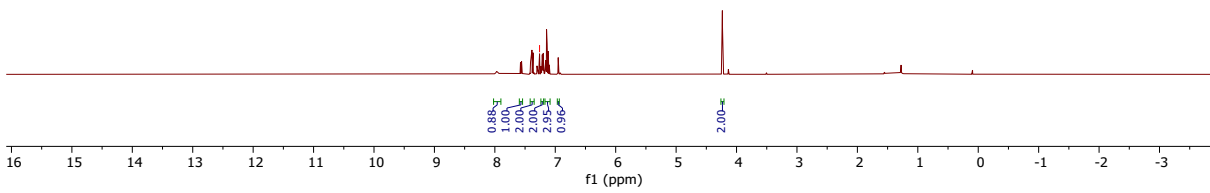



210427.439.11.fid  
Bei Zhou Bei 21-49-1  
Au13C CDCl3 {C:\Bruker\TopSpin3.5pl6} 2104 39

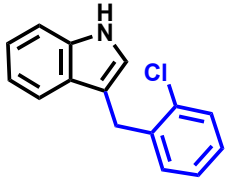

138.75  
136.39  
134.02  
130.58  
129.37  
127.44  
126.25  
126.25  
122.76  
122.13  
119.49  
119.13  
114.02  
111.15

77.33 CDCl3  
77.00 CDCl3  
76.73 CDCl3

29.09

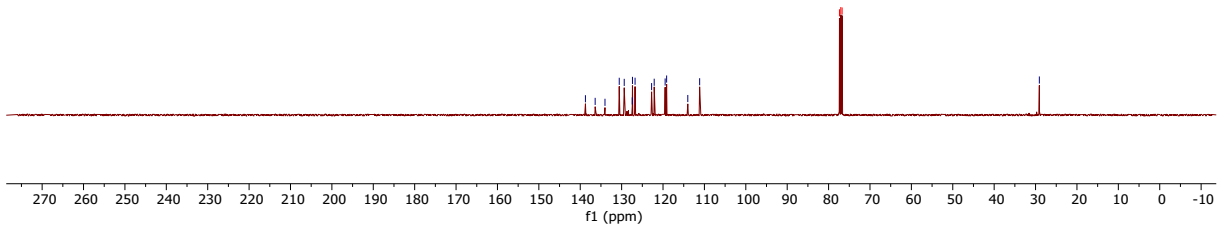

210705.f314.10.fid  
Bei Zhou Bei 21-96-1  
PROTON CDCl3 {C:\Bruker\TopSpin3.6.2} 2107 14

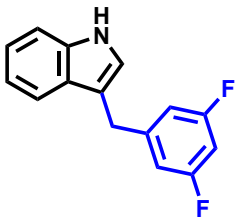

7.26 CDCl3

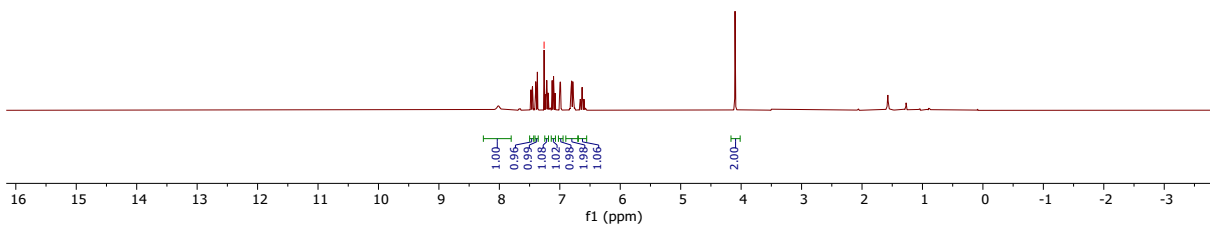

210705.f314.11.fid  
Bei Zhou Bei 21-96-1  
C13CPD CDCl3 {C:\Bruker\TopSpin3.6.2} 2107 14

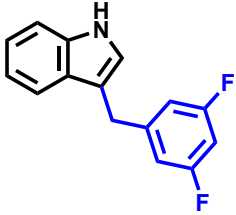

164.77  
161.46  
161.32  
145.42  
136.48  
136.48  
127.16  
127.16  
127.16  
122.54  
122.54  
122.34  
122.34  
119.66  
119.66  
118.93  
118.93  
114.09  
114.09  
111.52  
111.52  
111.42  
111.42  
111.22  
111.22  
111.19  
111.19  
101.73  
101.73  
101.40  
101.40  
101.06  
101.06  
77.03 CDCl3  
77.03 CDCl3  
76.61 CDCl3  
31.39  
31.39

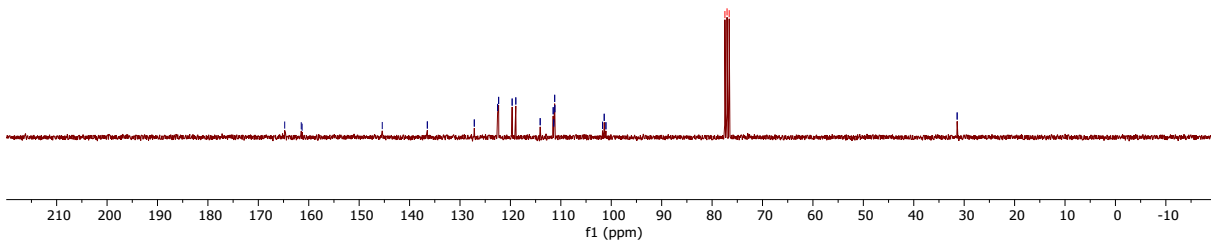

211004.318.10.fid  
Bei Zhou Bei 21-96  
Au19F CDCl3 {C:\Bruker\TopSpin3.6.2} 2110 18

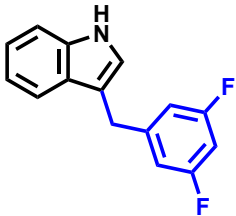

-110.68  
-110.70  
-110.73  
-110.76  
-110.77

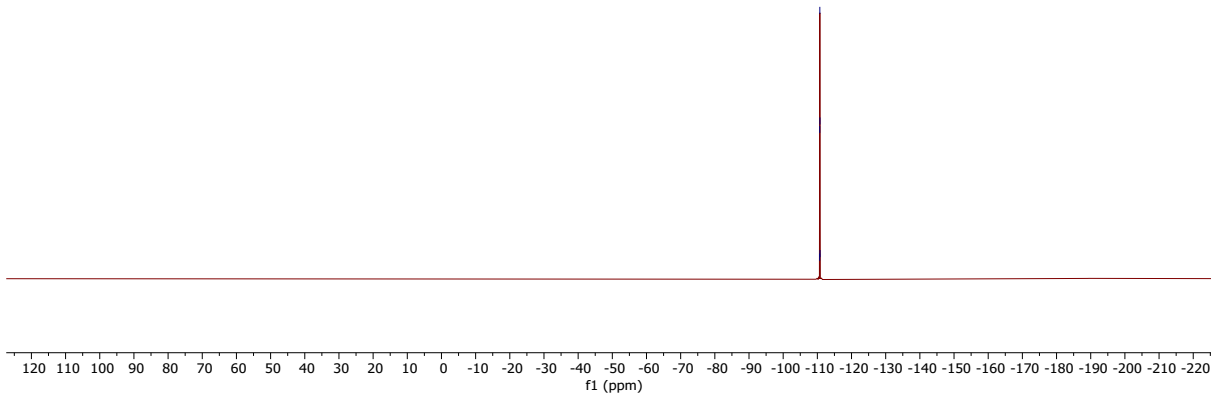

210519.456.10.fid  
Zhou/ Bei-21-51  
Au1H CDCl3 {C:\Bruker\TopSpin3.5pl6} 2105 56

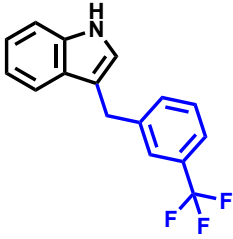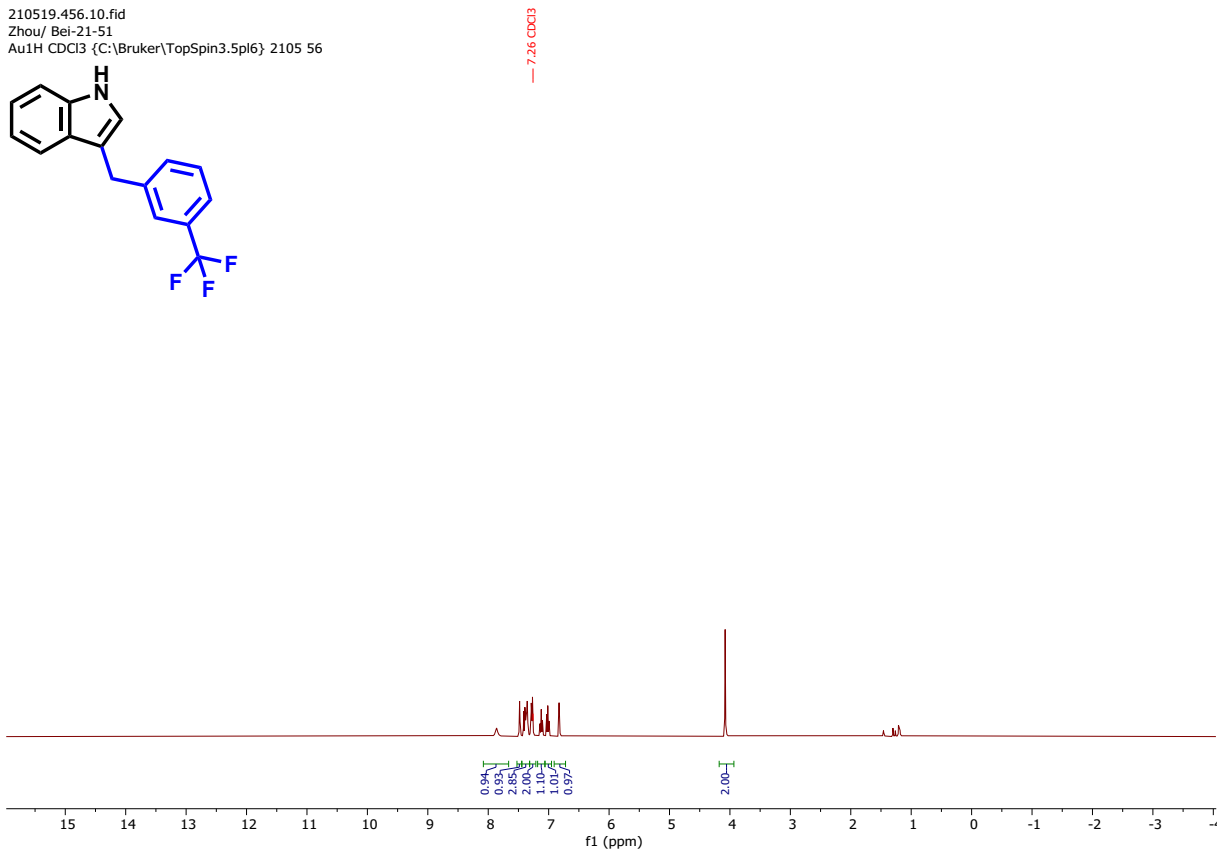

210519.456.11.fid  
Zhou/ Bei-21-51  
Au13C CDCl3 {C:\Bruker\TopSpin3.5pl6} 2105 56

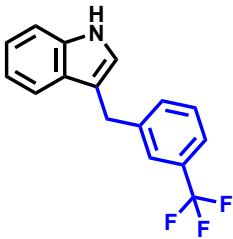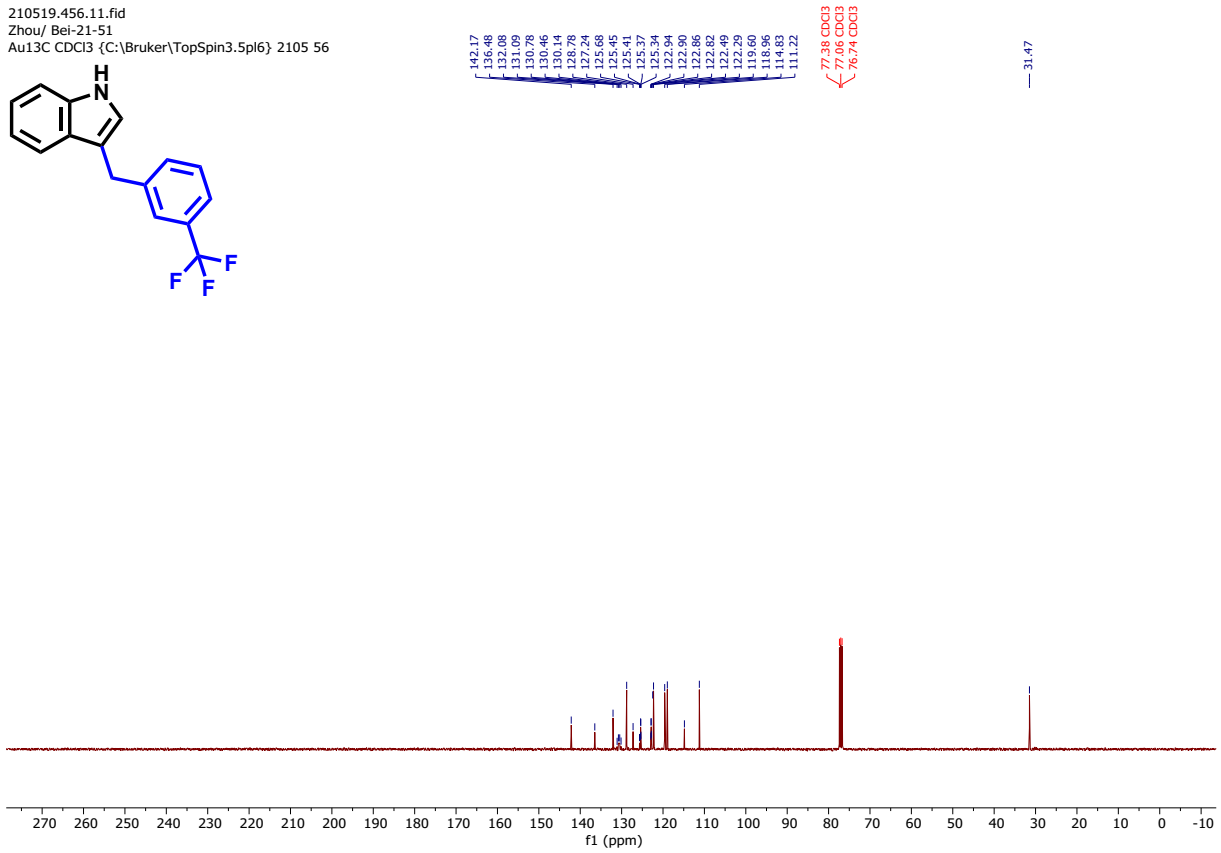

210525.427.10.fid  
Zhou/ Bei 21-51  
F19 CDCl3 {C:\Bruker\TopSpin3.5pl6} 2105 27

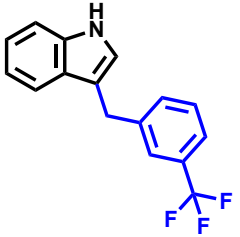

62.38  
62.39

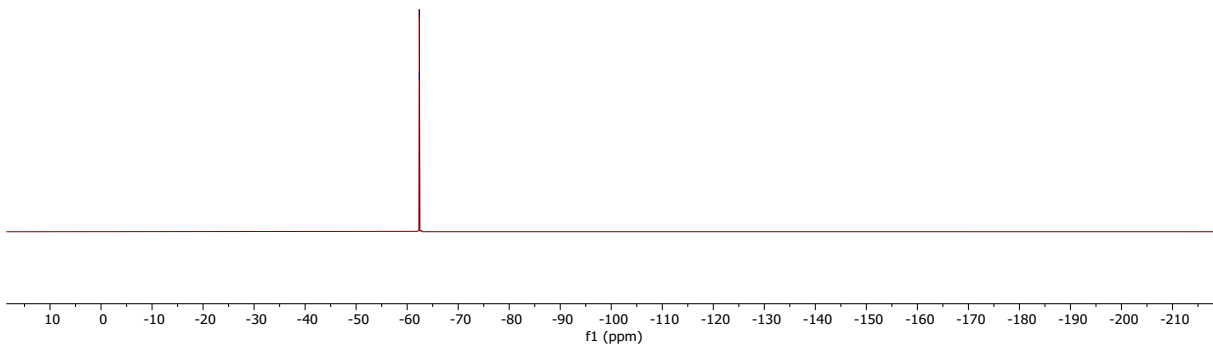

210316.334.10.fid  
Bei Zhou Bei 21-32  
Au1H CDCl3 {C:\Bruker\TopSpin3.6.2} 2103 34

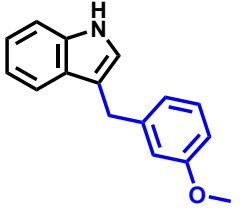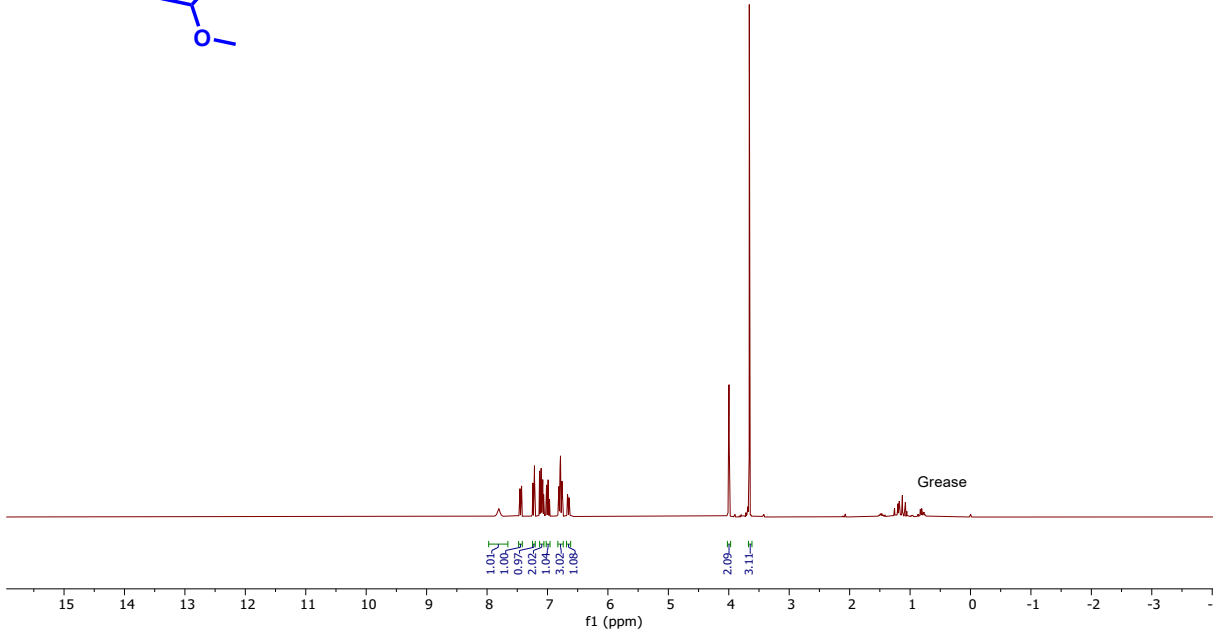

210316.334.11.fid  
Bei Zhou Bei 21-32  
Au13C CDCl3 {C:\Bruker\TopSpin3.6.2} 2103 34

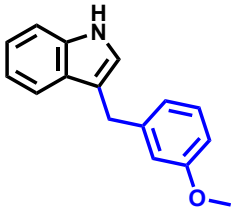

159.69  
142.96  
138.47  
137.49  
132.41  
122.06  
121.24  
119.40  
118.69  
114.89  
111.20  
111.12  
77.53 CDCl3  
77.00 CDCl3  
76.67 CDCl3  
55.17  
31.68

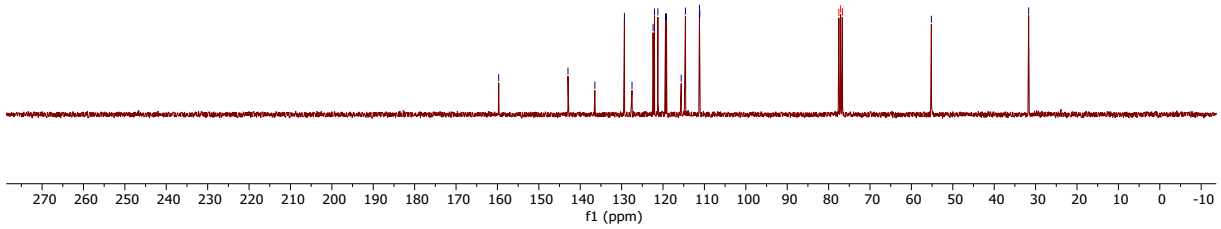

210719.302.10.fid  
Bei Zhou 21-97  
Au1H CDCl3 {C:\Bruker\TopSpin3.6.2} 2107 2

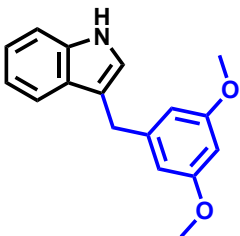

7.26 CDCl3

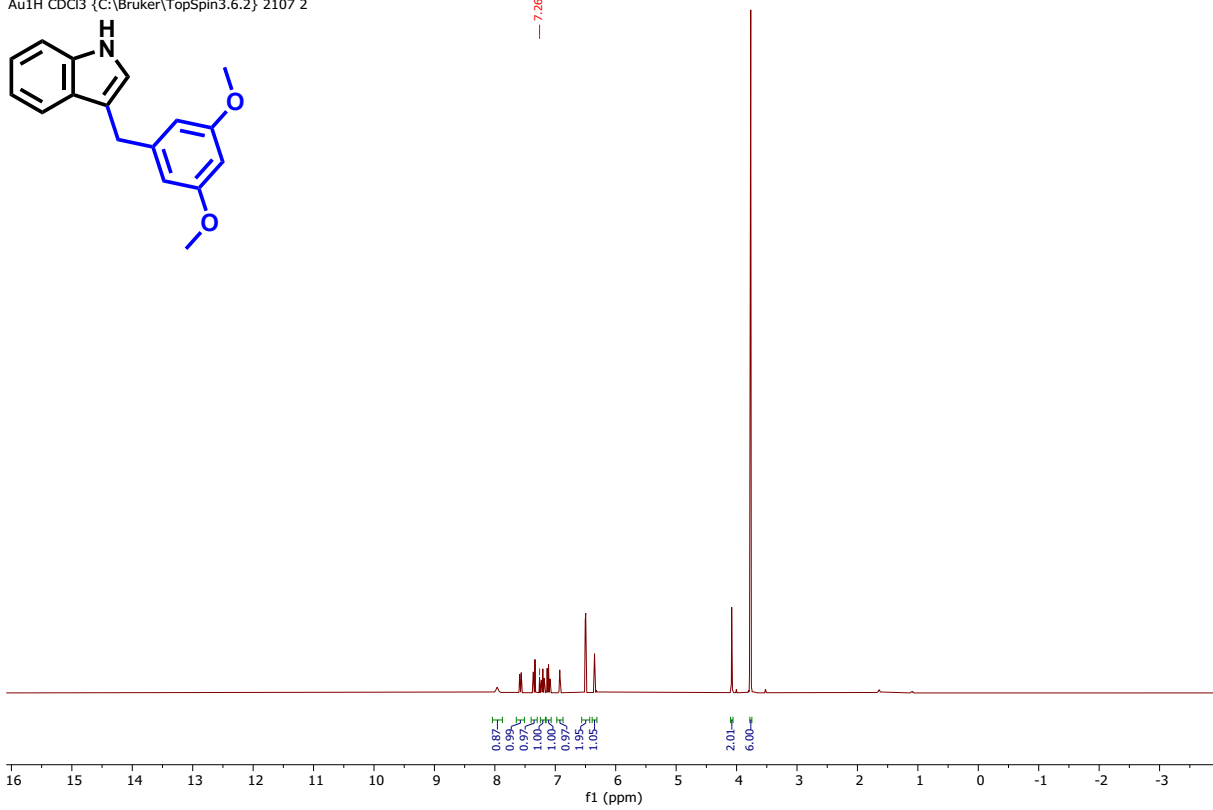

210719.302.11.fid  
Bei Zhou 21-97  
Au13C CDCl3 {C:\Bruker\TopSpin3.6.2} 2107 2

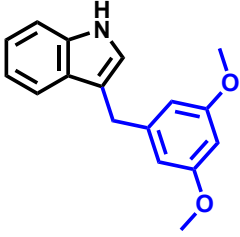

160.78  
143.77  
136.46  
127.49  
122.42  
122.05  
119.86  
119.83  
115.40  
111.11  
106.95  
97.88  
77.53 CDCl3  
77.26 CDCl3  
76.67 CDCl3  
55.29  
31.92

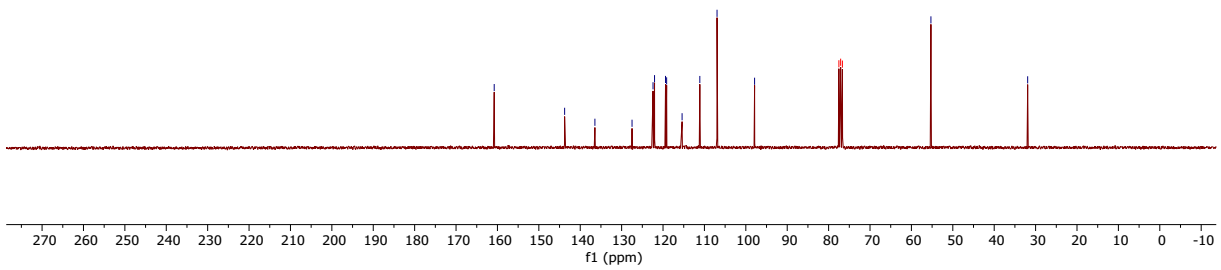

210701.312.10.fid  
Bei Zhou Bei 21-92  
Au1H CDCl3 {C:\Bruker\TopSpin3.6.2} 2107 12

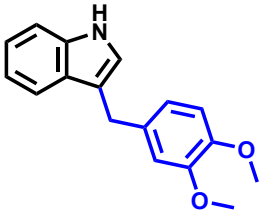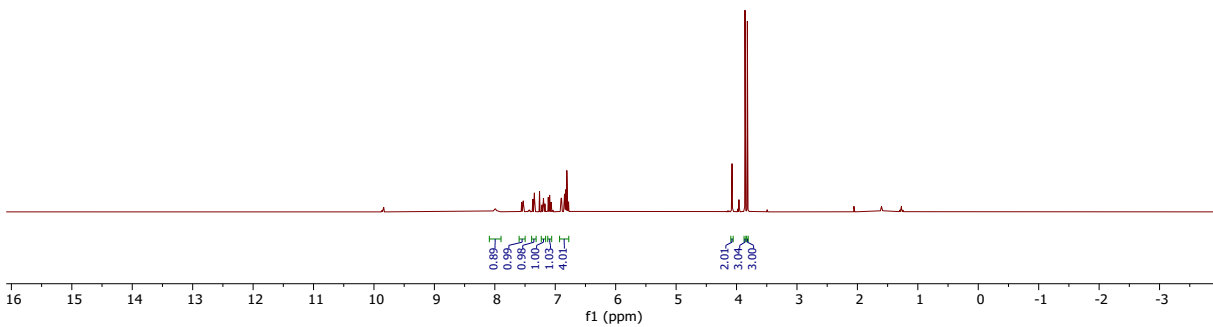





210809.f328.11.fid  
Bei Zhou Bei 21-99-1  
C13CPD CDCl3 {C:\Bruker\TopSpin3.6.2} 2108 28

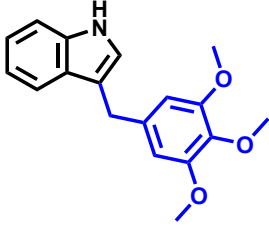

153.12

136.83  
136.48

127.43  
122.32  
122.14  
119.40  
119.07  
115.72  
111.12  
105.75

77.45 CDCl3  
77.03 CDCl3  
76.61 CDCl3

60.88  
56.07

32.00

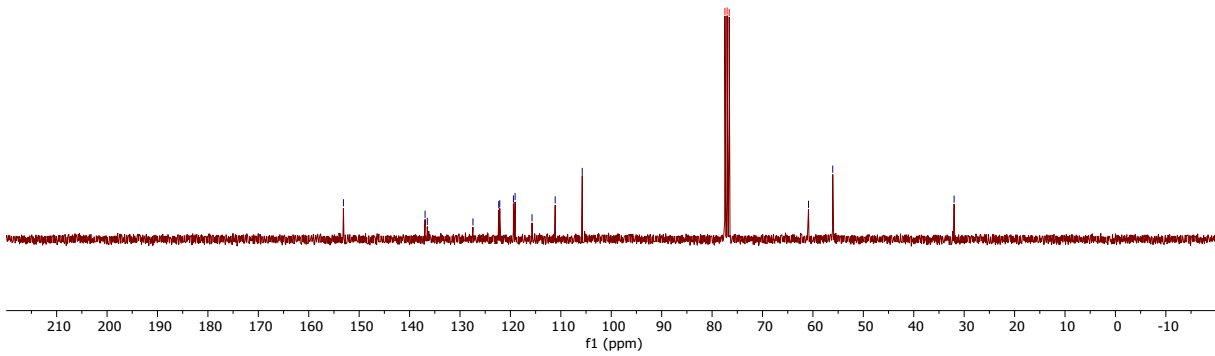

210628.324.10.fid  
Bei Zhou Bei 21-94-3  
Au1H CDCl3 {C:\Bruker\TopSpin3.6.2} 2106 24

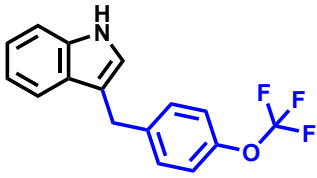

7.26 CDCl3

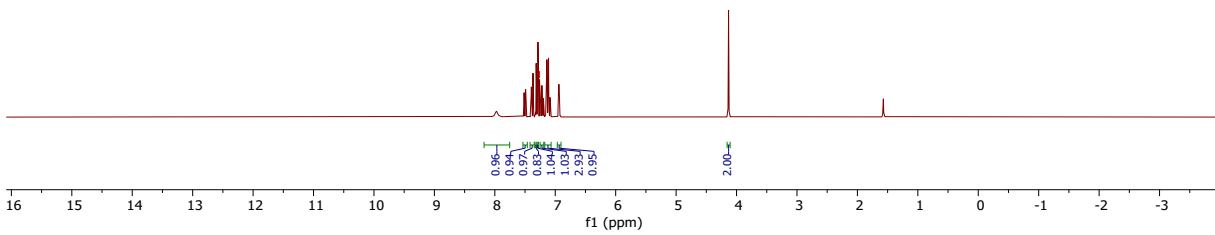

210628.324.11.fid  
Bei Zhou Bei 21-94-3  
Au13C CDCl3 {C:\Bruker\TopSpin3.6.2} 2106 24

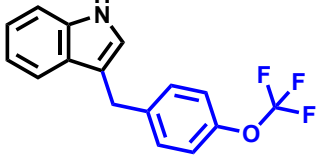

147.48  
139.99  
136.49  
129.85  
127.28  
126.26  
122.25  
120.90  
119.53  
119.04  
118.85  
115.19  
111.19

77.47 CDCl3  
77.00 CDCl3  
76.62 CDCl3

30.94

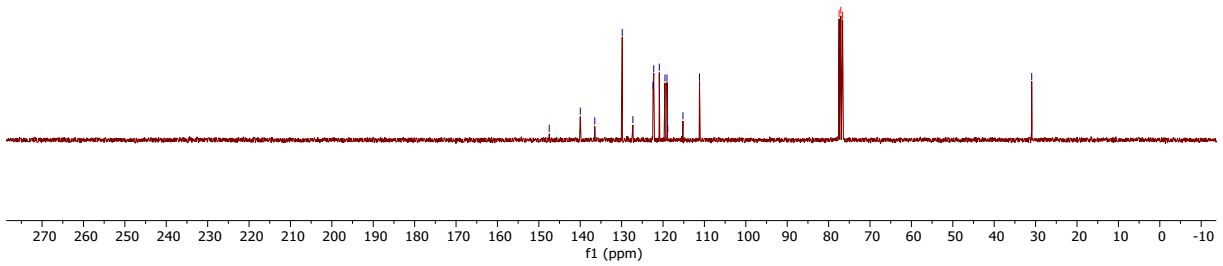

210630.f351.10.fid  
Bei Zhou Bei 21-94  
F19 CDCl3 {C:\Bruker\TopSpin3.6.2} 2106 51

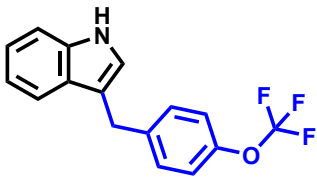

-57.87

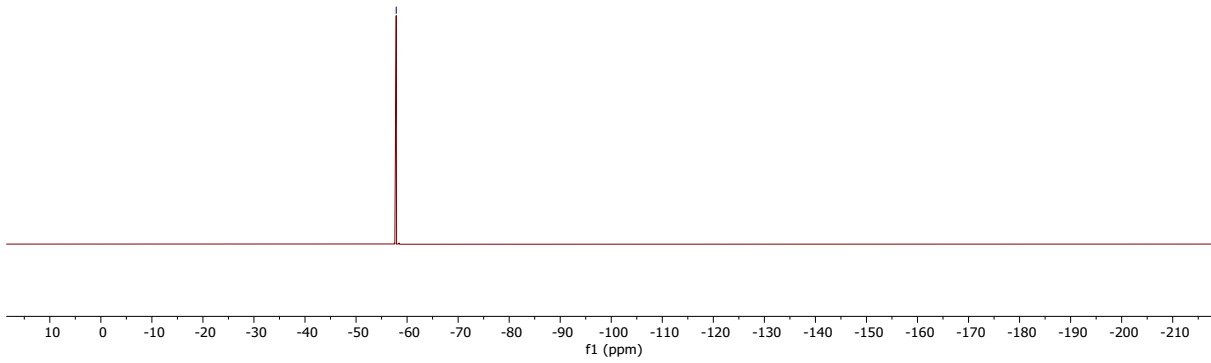

210427.436.10.fid  
Bei Zhou Bei 21-39  
Au1H CDCl3 {C:\Bruker\TopSpin3.5pl6} 2104 36

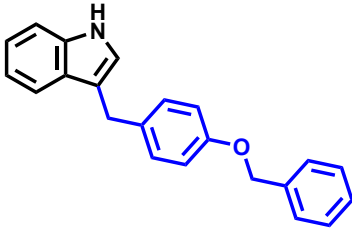

7.26 CDCl3

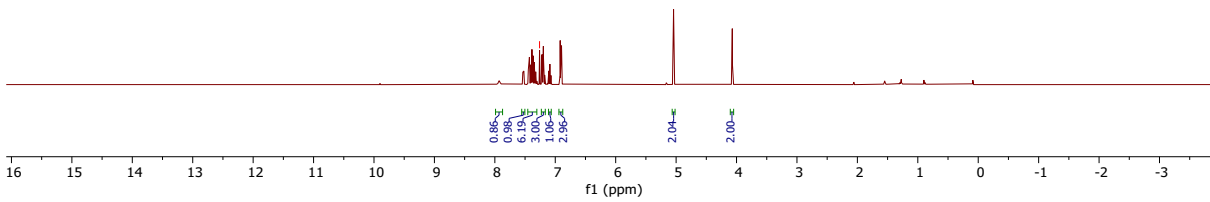

210427.436.11.fid  
Bei Zhou Bei 21-39  
Au13C CDCl3 {C:\Bruker\TopSpin3.5pl6} 2104 36

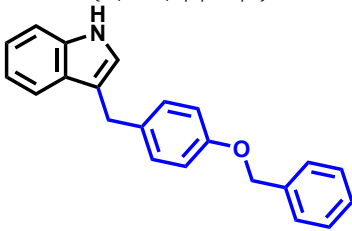

157.10

137.25  
136.49  
133.62  
129.62  
128.58  
127.91  
127.51  
122.23  
119.95  
119.20  
116.26  
114.73  
111.07

77.36 CDCl3  
77.05 CDCl3  
76.73 CDCl3  
70.08

30.73

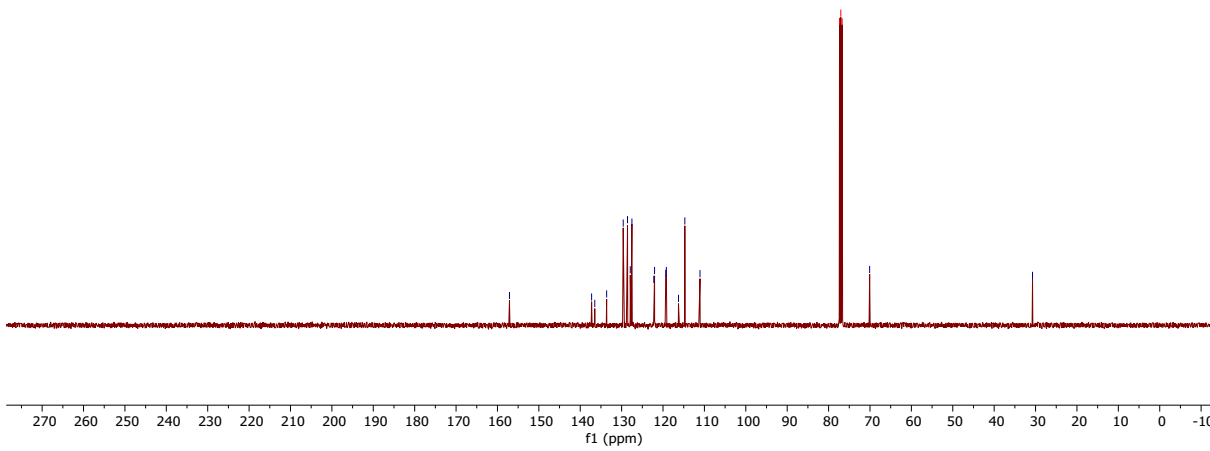

210329.f334.10.fid  
Bei Zhou Bei 21-52  
PROTON CDCl3 {C:\Bruker\TopSpin3.6.2} 2103 34

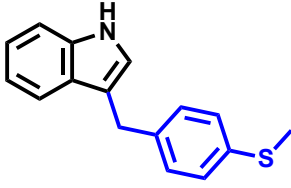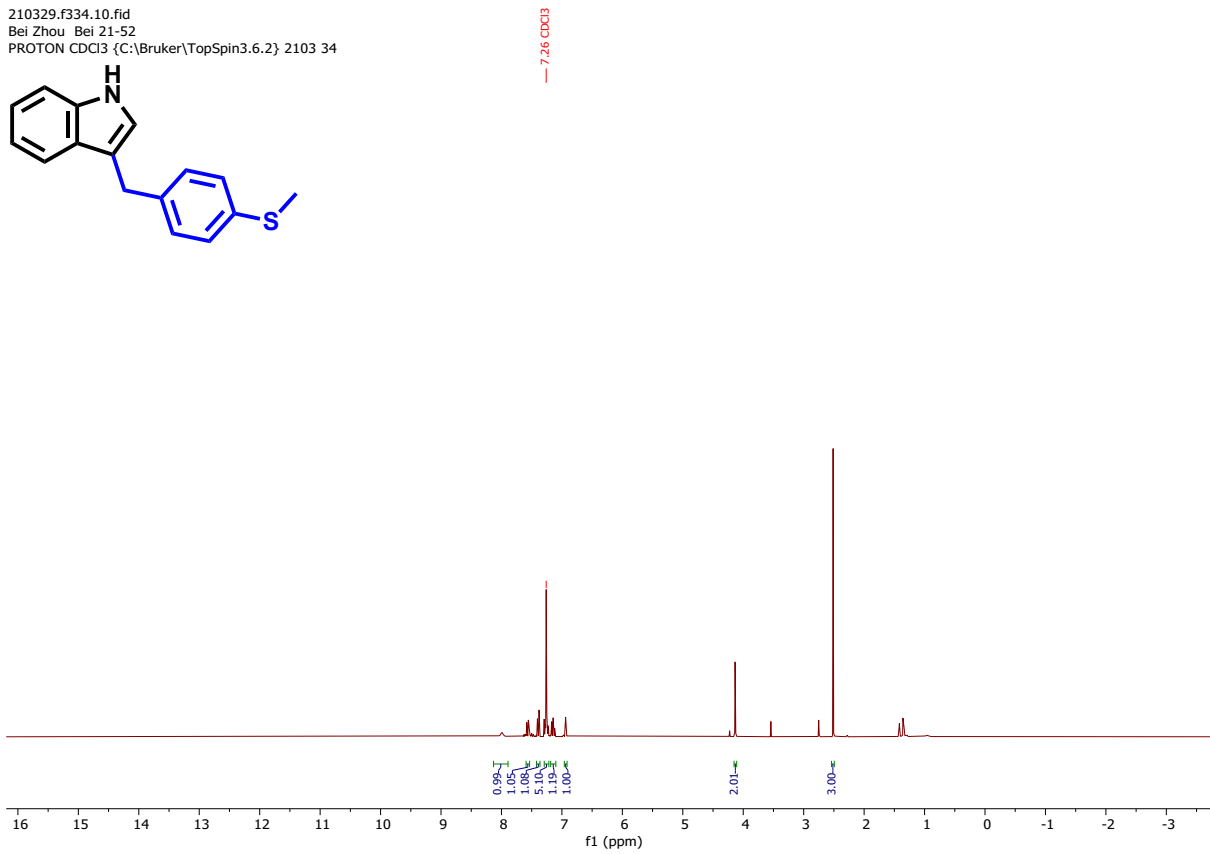

210329.f334.11.fid  
Bei Zhou Bei 21-52  
C13CPD CDCl3 {C:\Bruker\TopSpin3.6.2} 2103 34

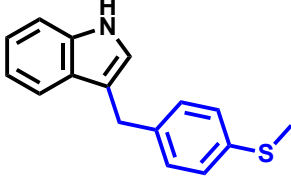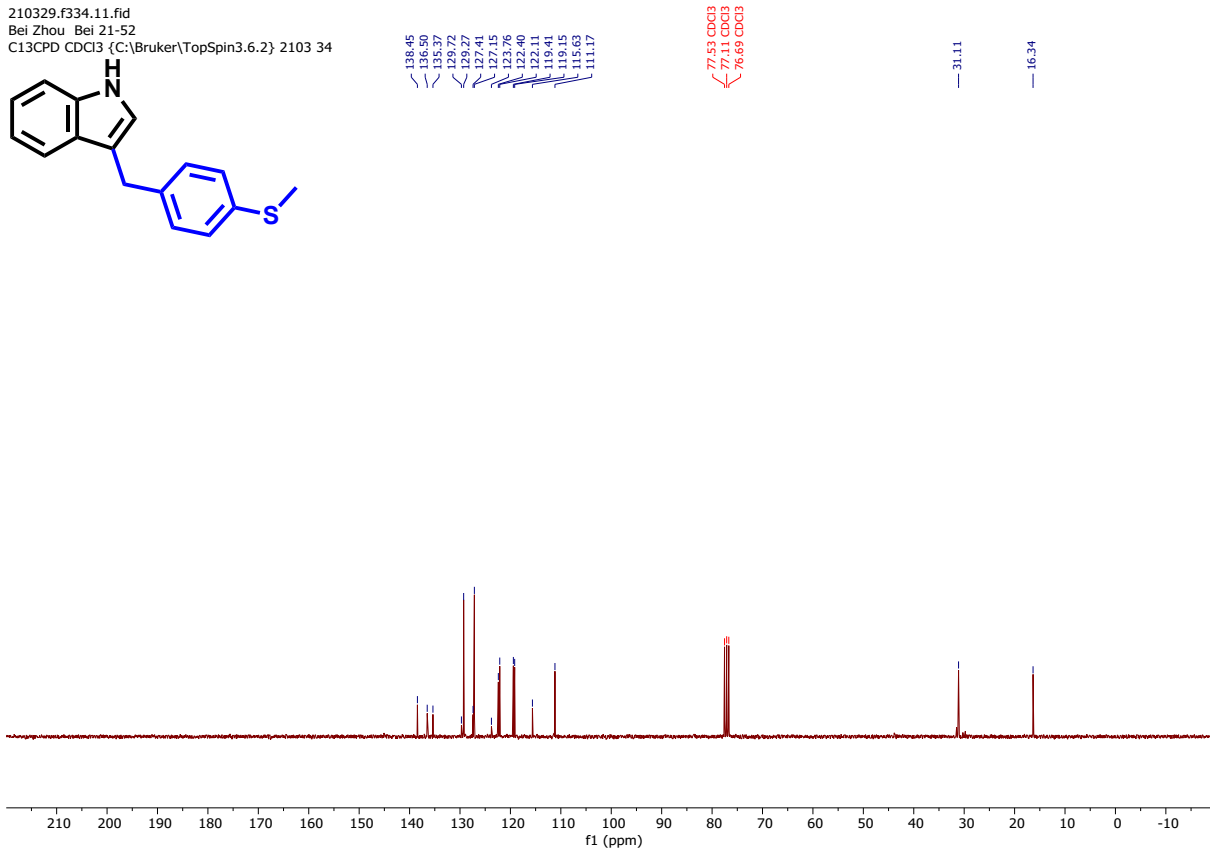

210525.433.10.fid  
Zhou/ Bei 21-41  
Au1H CDCl3 {C:\Bruker\TopSpin3.5pl6} 2105 33

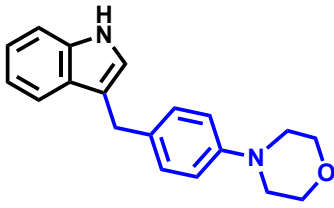

— 7.26 CDCl3

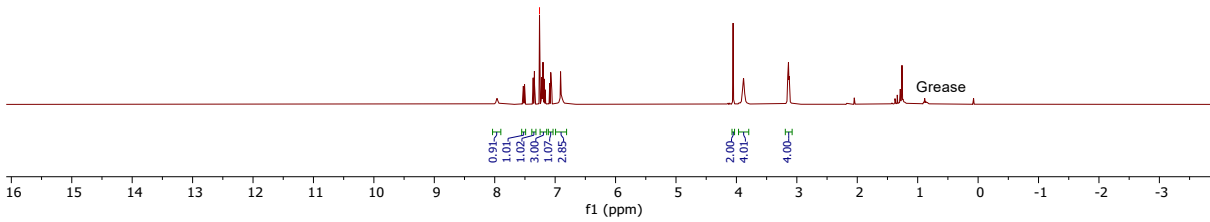

211004.325.11.fid  
Bei Zhou Bei 21-41  
Au13C CDCl3 {C:\Bruker\TopSpin3.6.2} 2110 25

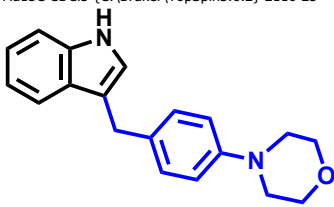

— 143.75  
— 136.50  
— 129.50  
— 129.24  
— 127.95  
— 127.45  
— 122.02  
— 119.31  
— 119.18  
— 116.37  
— 116.11  
— 111.08  
— 77.48 CDCl3  
— 77.06 CDCl3  
— 76.63 CDCl3  
— 66.73  
— 50.21  
— 30.72

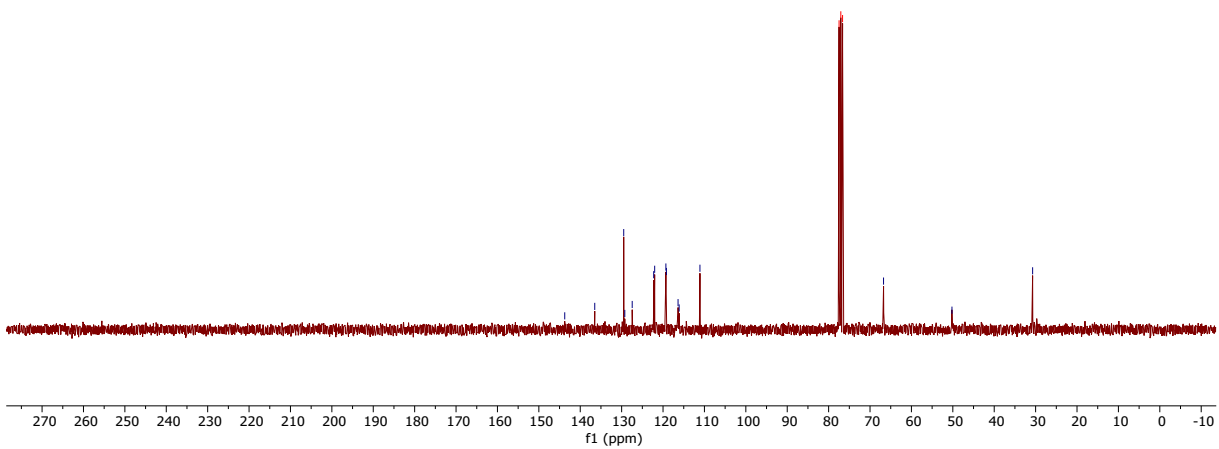

210427.435.10.fid  
Bei Zhou Bei 21-31  
Au1H CDCl3 {C:\Bruker\TopSpin3.5pl6} 2104 35

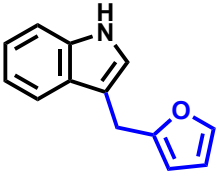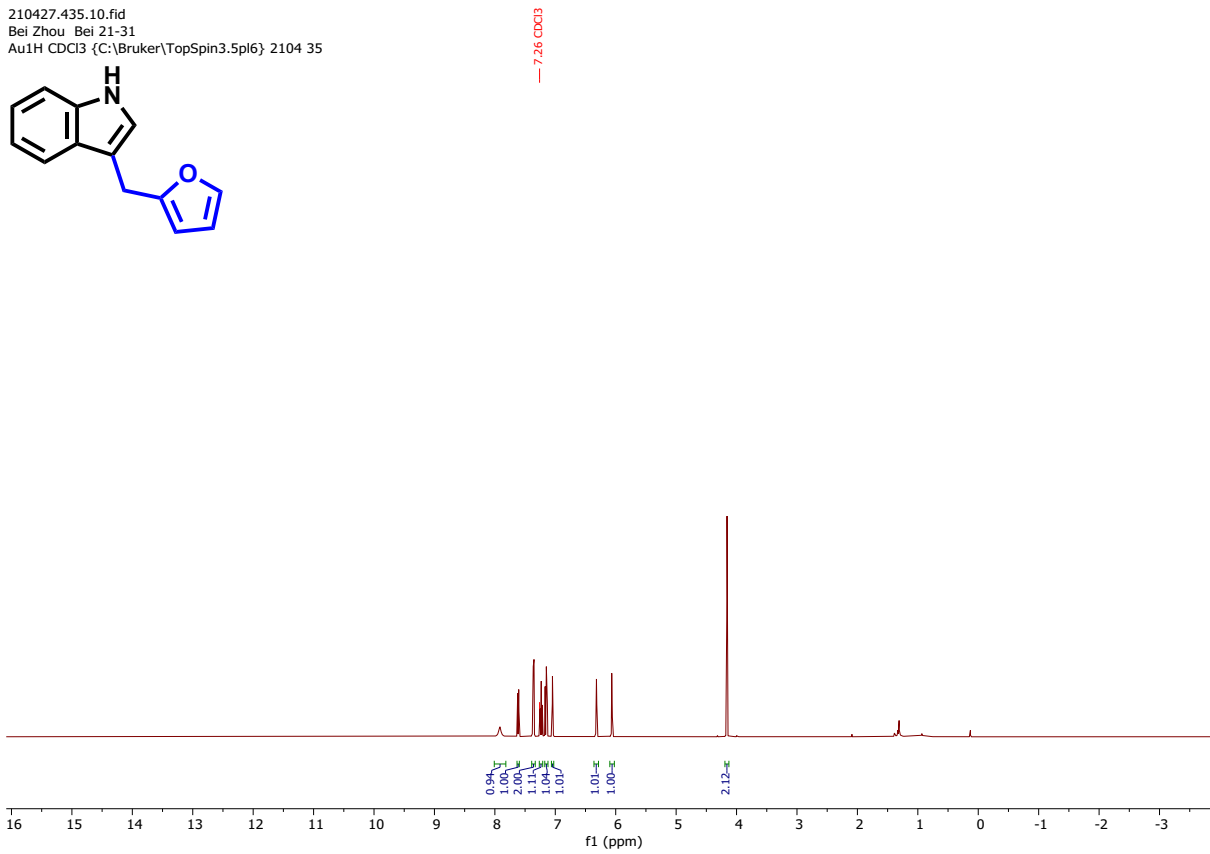

210427.435.11.fid  
Bei Zhou Bei 21-31  
Au13C CDCl3 {C:\Bruker\TopSpin3.5pl6} 2104 35

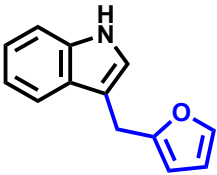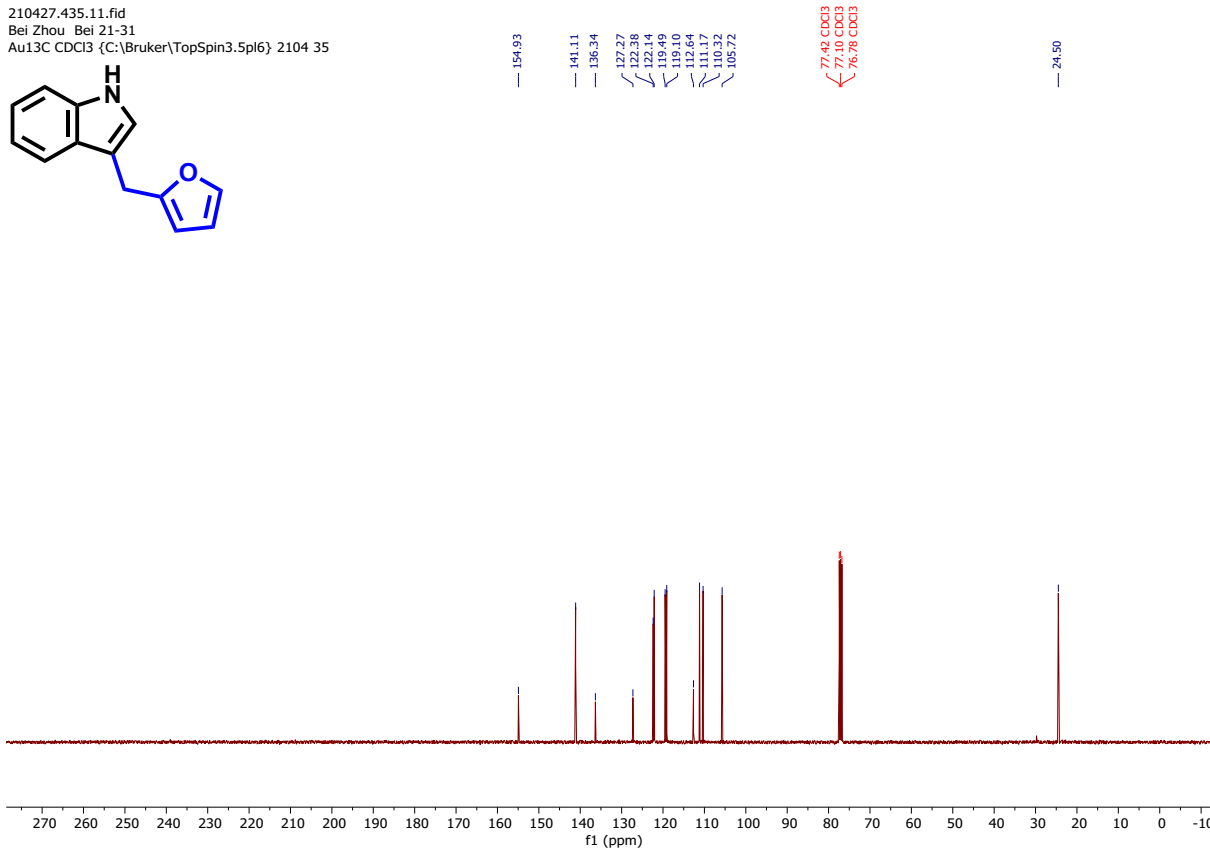

210628.314.10.fid  
Bei Zhou Bei 21-40-2  
Au1H CDCl3 {C:\Bruker\TopSpin3.6.2} 2106 14

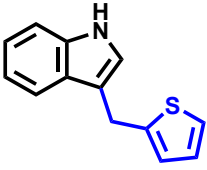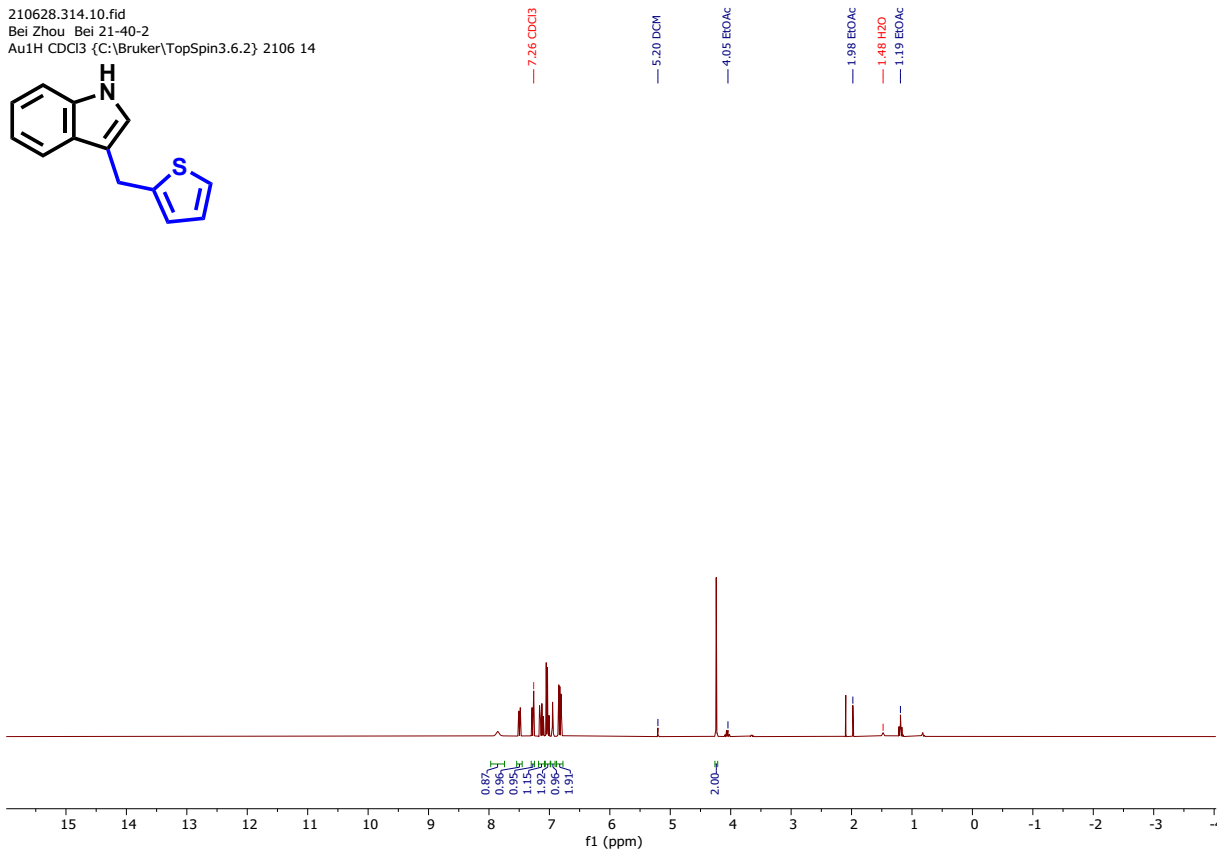

210628.314.11.fid  
Bei Zhou Bei 21-40-2  
Au13C CDCl3 {C:\Bruker\TopSpin3.6.2} 2106 14

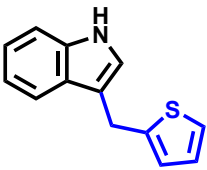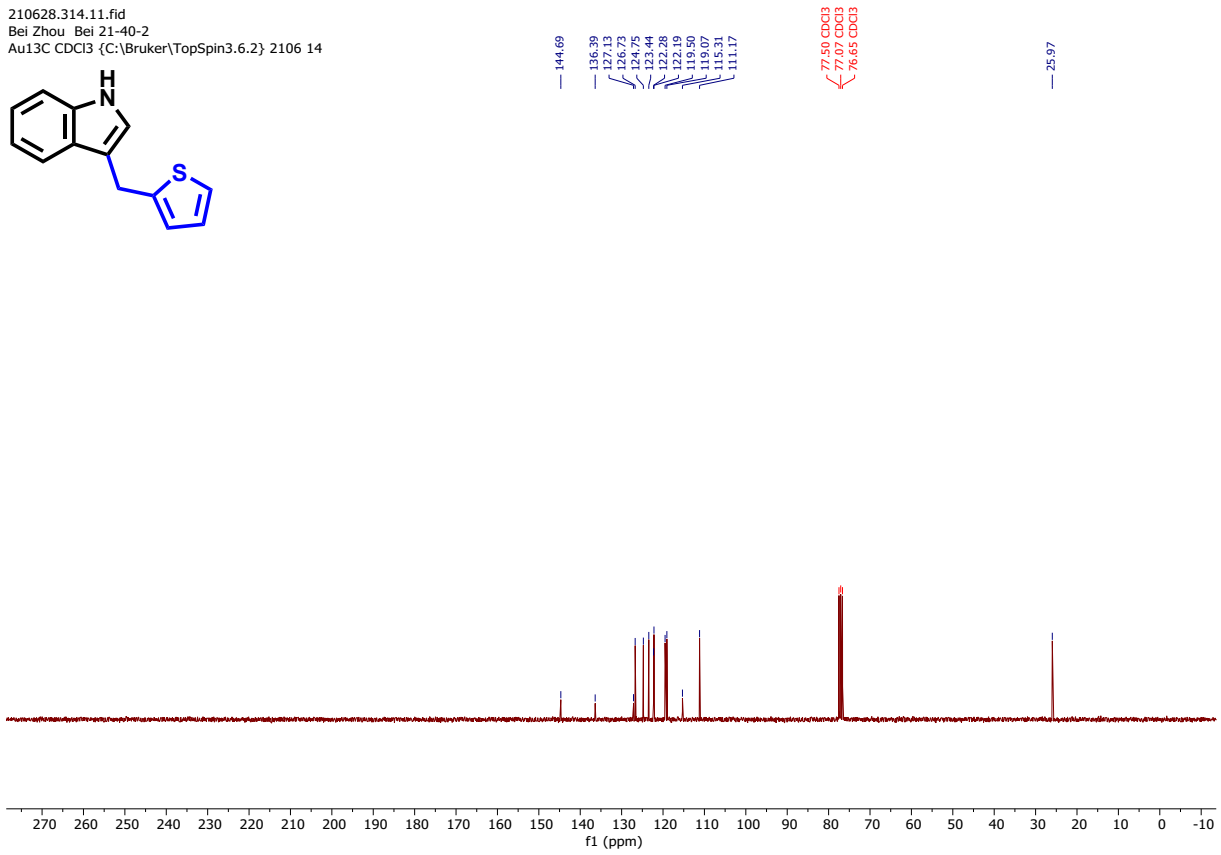



210727.f348.10.fid  
Bei Zhou Bei 21-38-1  
PROTON CDCl3 {C:\Bruker\TopSpin3.6.2} 2107 48

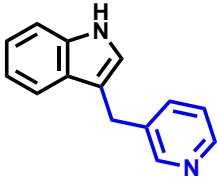

7.26 CDCl3

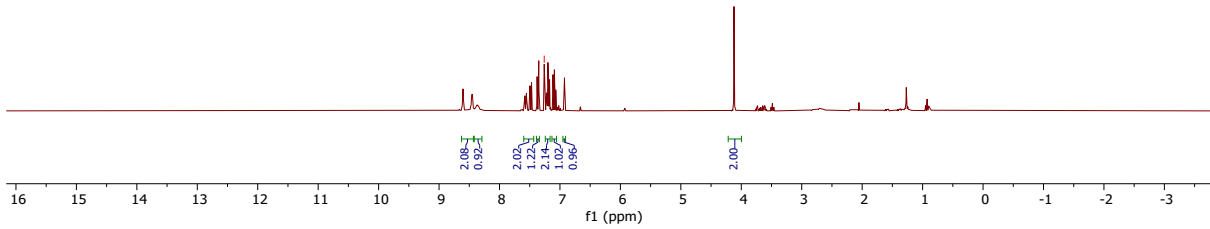

210727.f348.11.fid  
Bei Zhou Bei 21-38-1  
C13CPD CDCl3 {C:\Bruker\TopSpin3.6.2} 2107 48

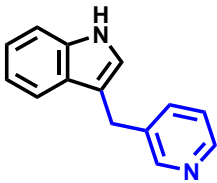

149.83

147.19

136.82

136.56

136.41

127.12

123.45

122.35

119.55

118.85

114.35

111.28

77.48 CDCl3

77.05 CDCl3

76.63 CDCl3

28.88

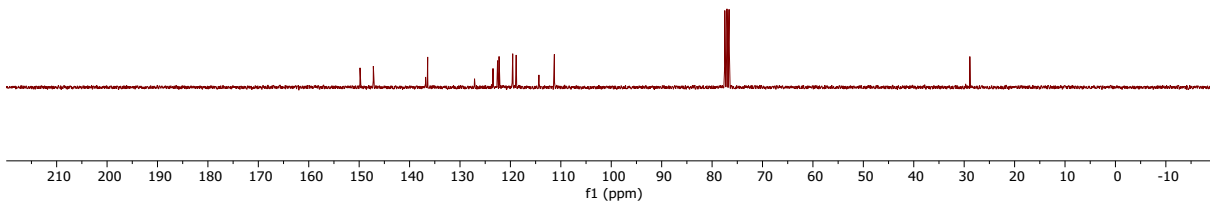

210322.315.10.fid  
Bei Zhou / Bei 21-36  
Au1H CDCl3 {C:\Bruker\TopSpin3.6.2} 2103 15

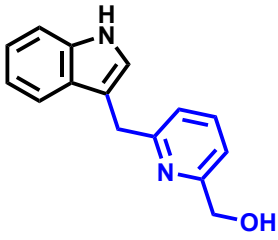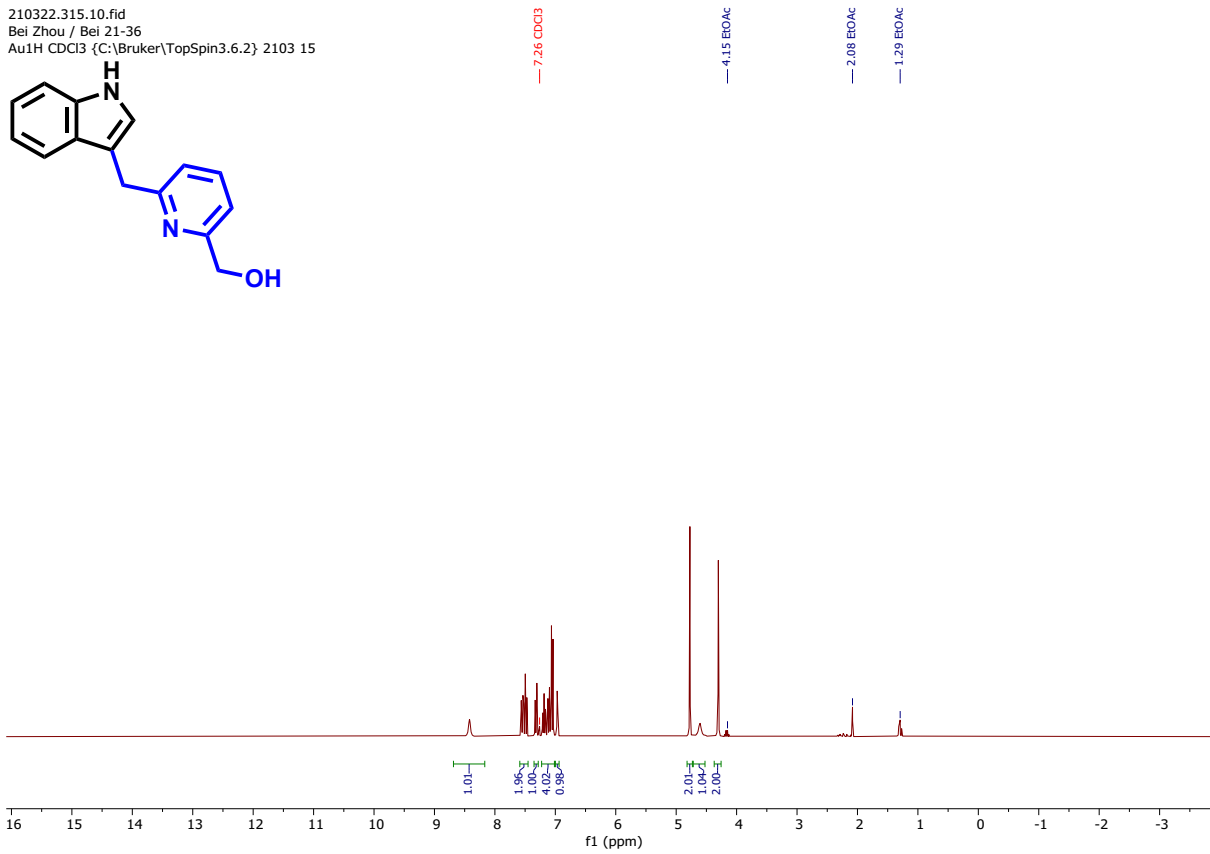

210322.315.11.fid  
Bei Zhou / Bei 21-36  
Au13C CDCl3 {C:\Bruker\TopSpin3.6.2} 2103 15

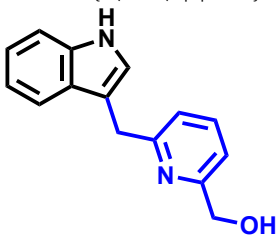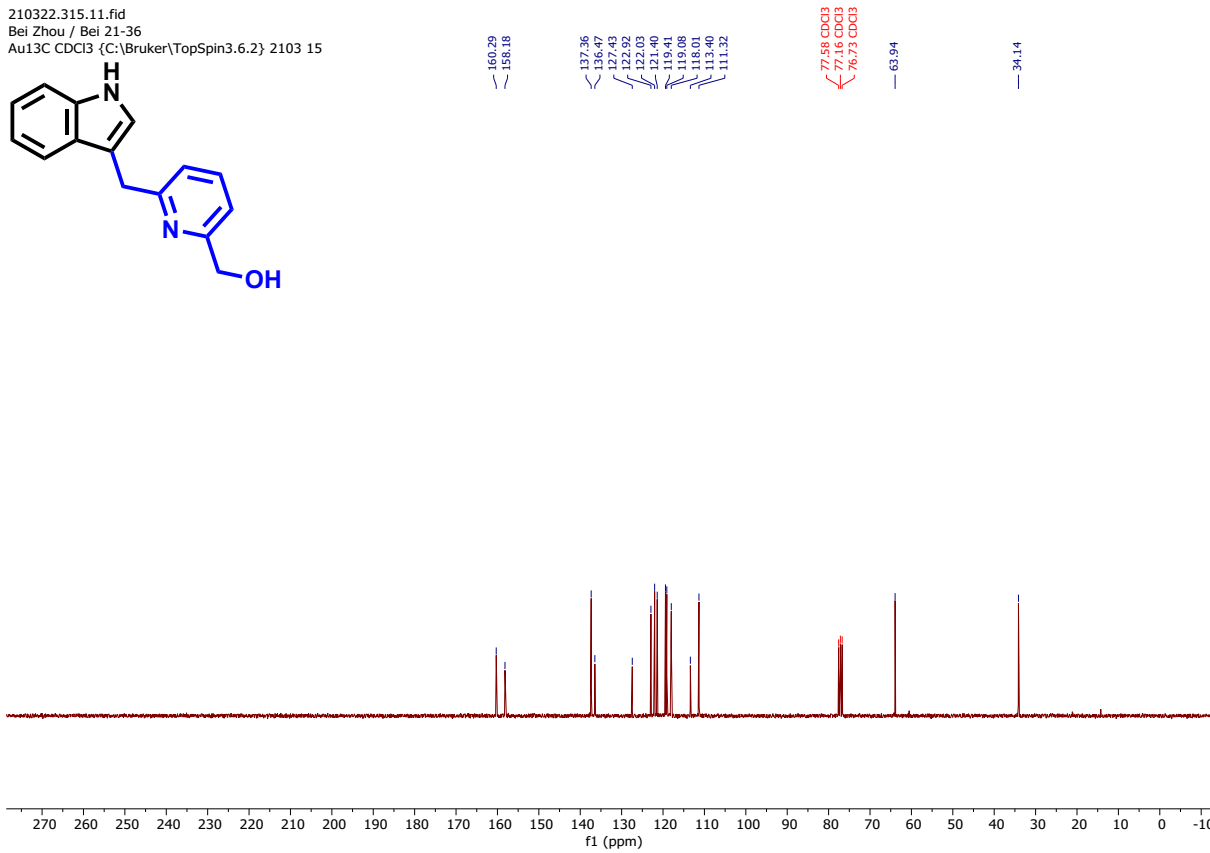

210519.457.10.fid  
Zhou/ Bei-21-83  
Au1H CDCl3 {C:\Bruker\TopSpin3.5pl6} 2105 57

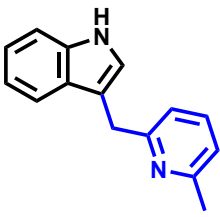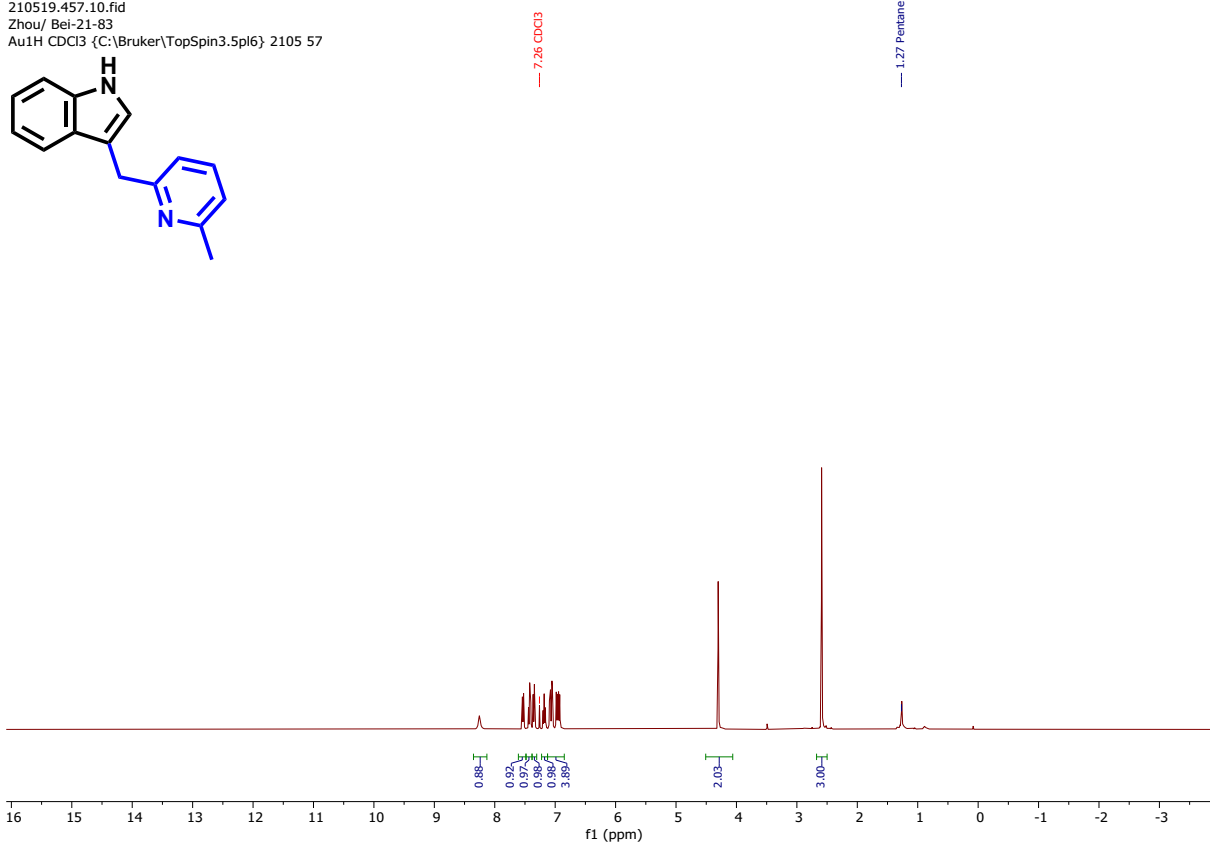

210519.457.11.fid  
Zhou/ Bei-21-83  
Au13C CDCl3 {C:\Bruker\TopSpin3.5pl6} 2105 57

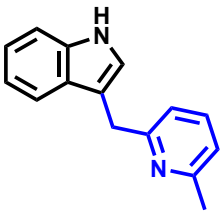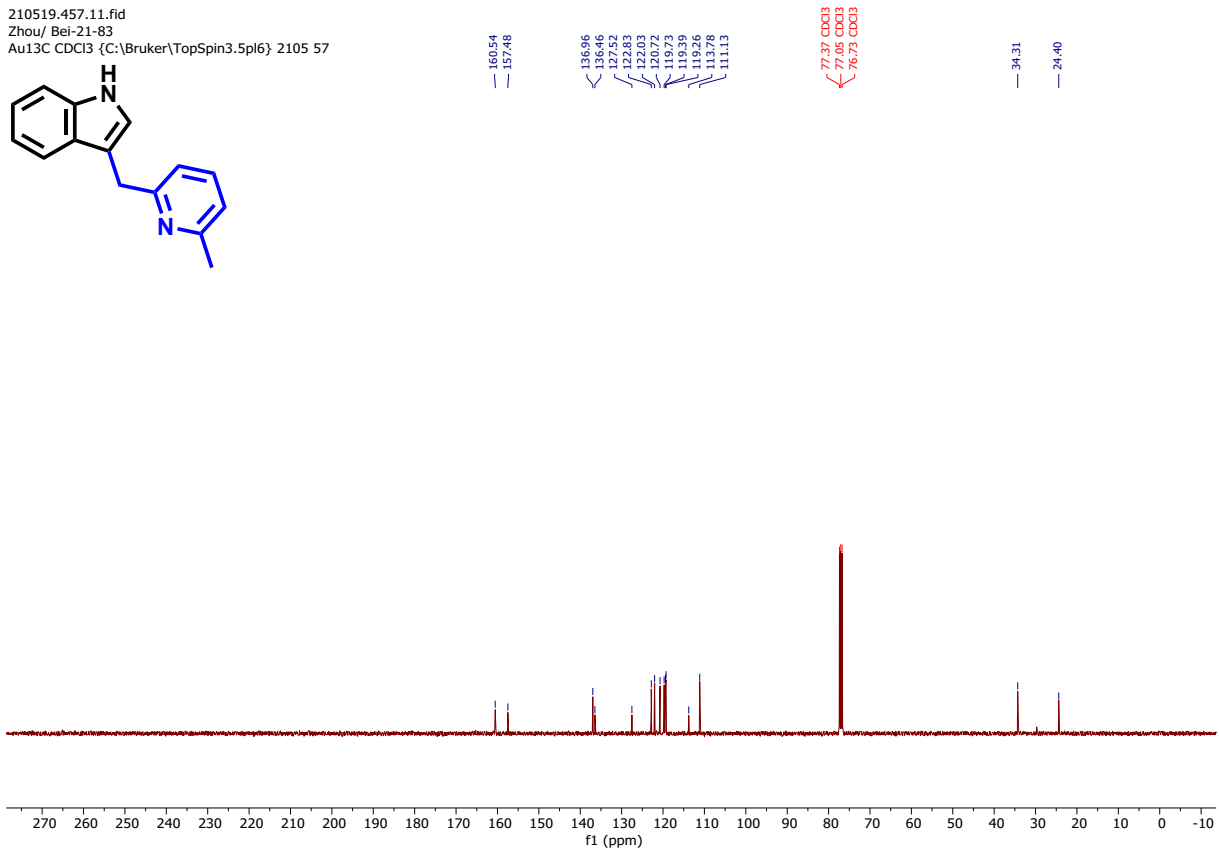

210427.438.10.fid  
Bei Zhou Bei 21-48  
Au1H CDCl3 {C:\Bruker\TopSpin3.5pl6} 2104 38

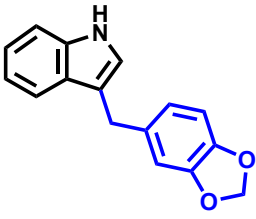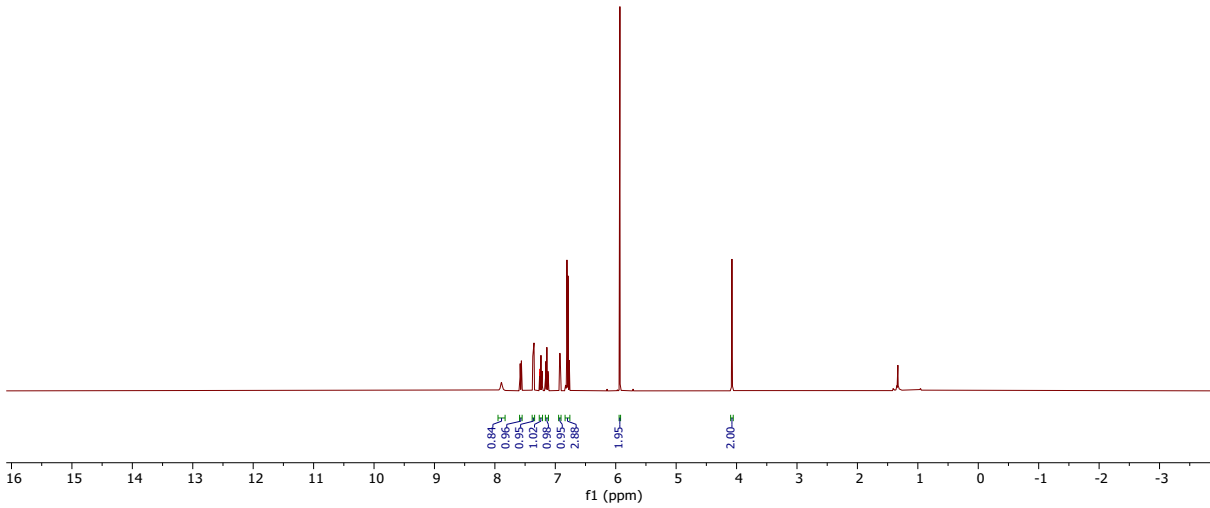

210427.438.11.fid  
Bei Zhou Bei 21-48  
Au13C CDCl3 {C:\Bruker\TopSpin3.5pl6} 2104 38

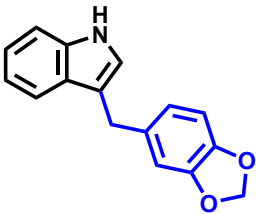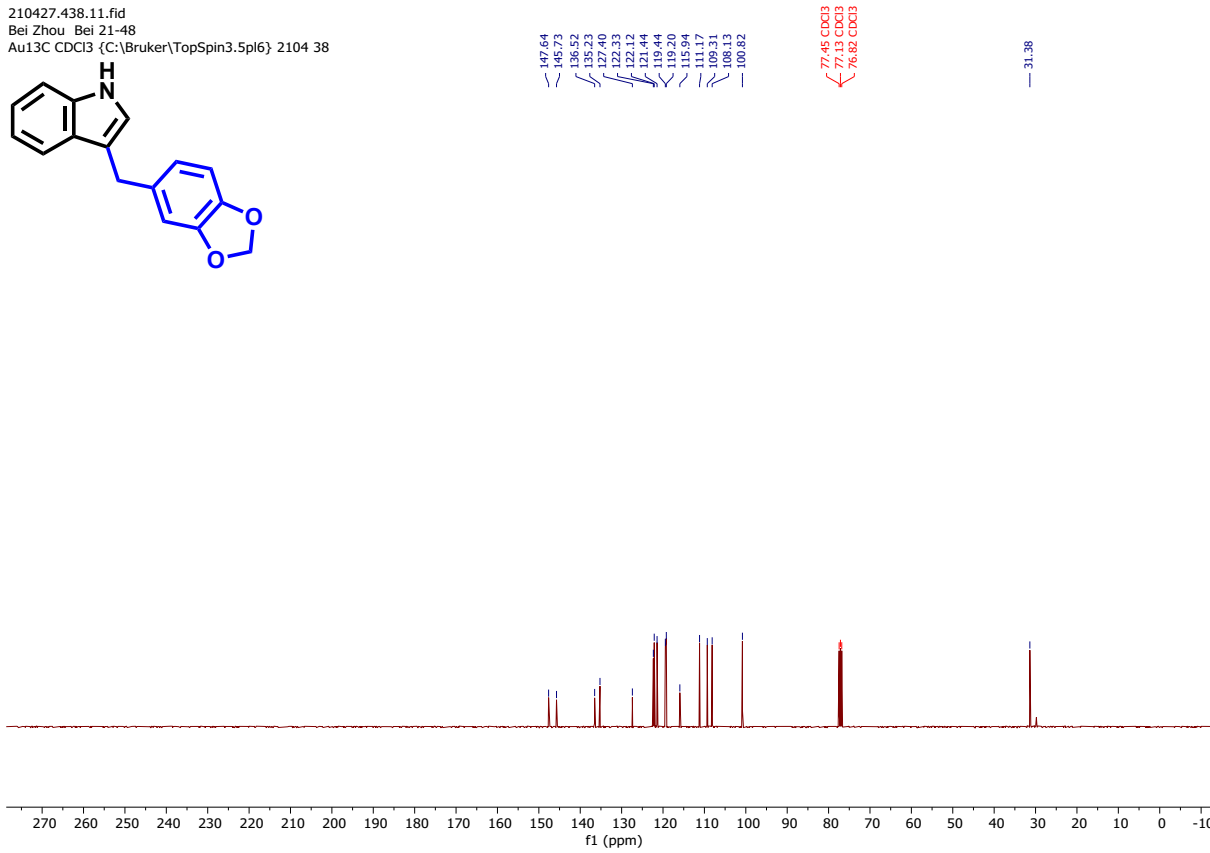

210628.325.10.fid  
Bei Zhou Bei 21-95  
Au1H CDCl3 {C:\Bruker\TopSpin3.6.2} 2106 25

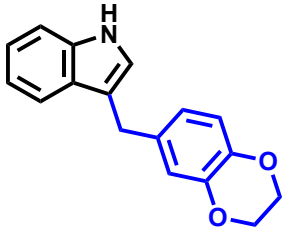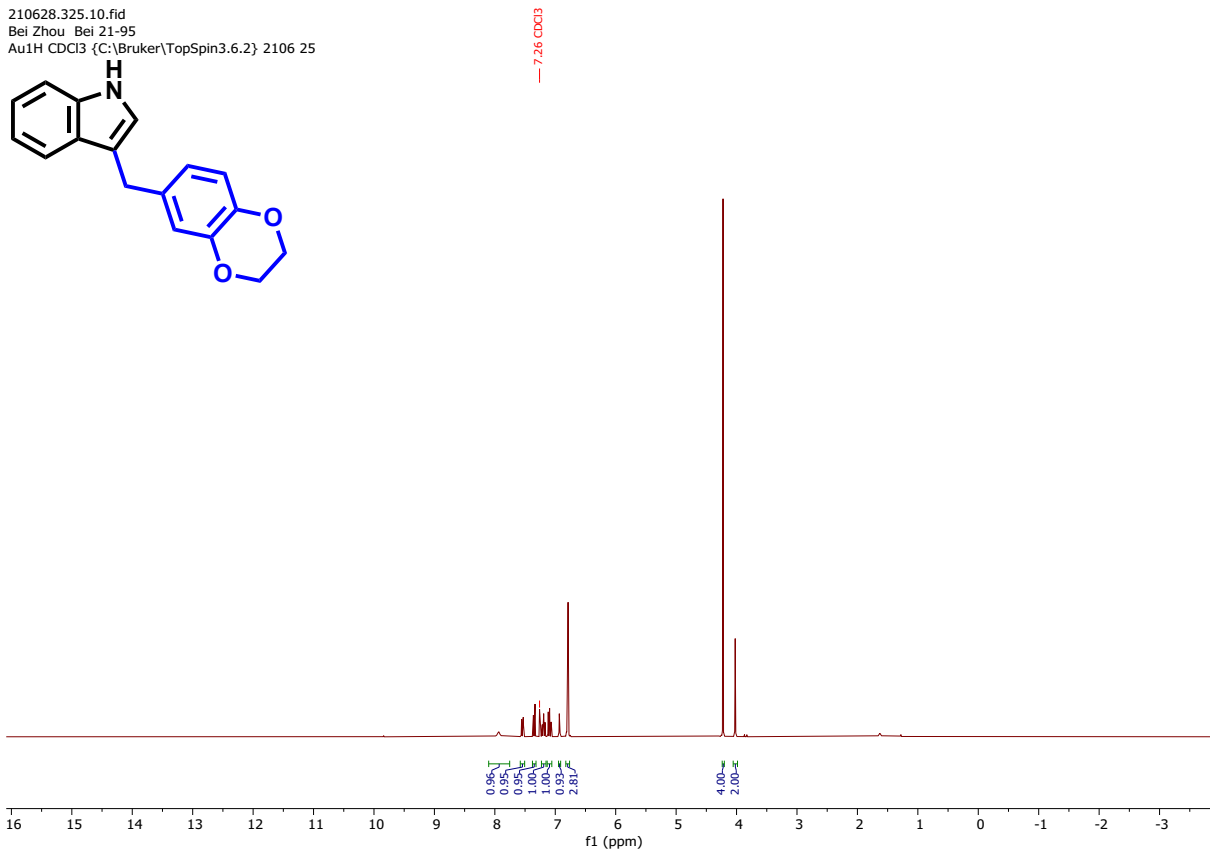

210628.325.11.fid  
Bei Zhou Bei 21-95  
Au13C CDCl3 {C:\Bruker\TopSpin3.6.2} 2106 25

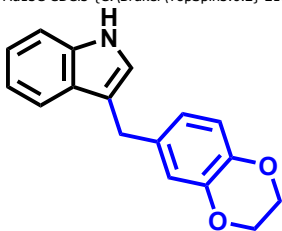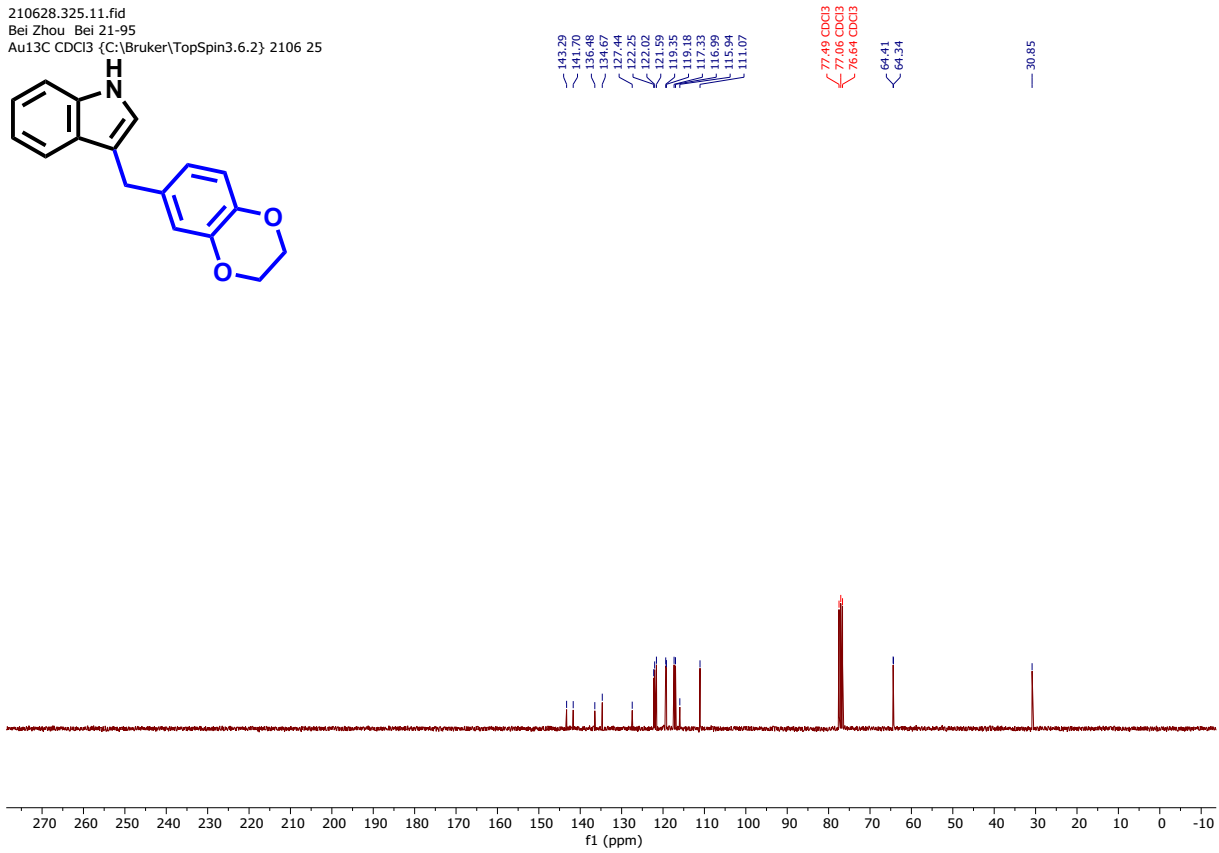

210825.303.10.fid  
Bei Zhou Bei 21-76  
Au1H CDCl3 {C:\Bruker\TopSpin3.6.2} 2108 3

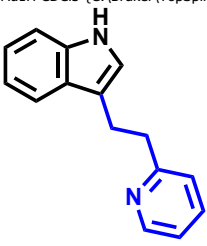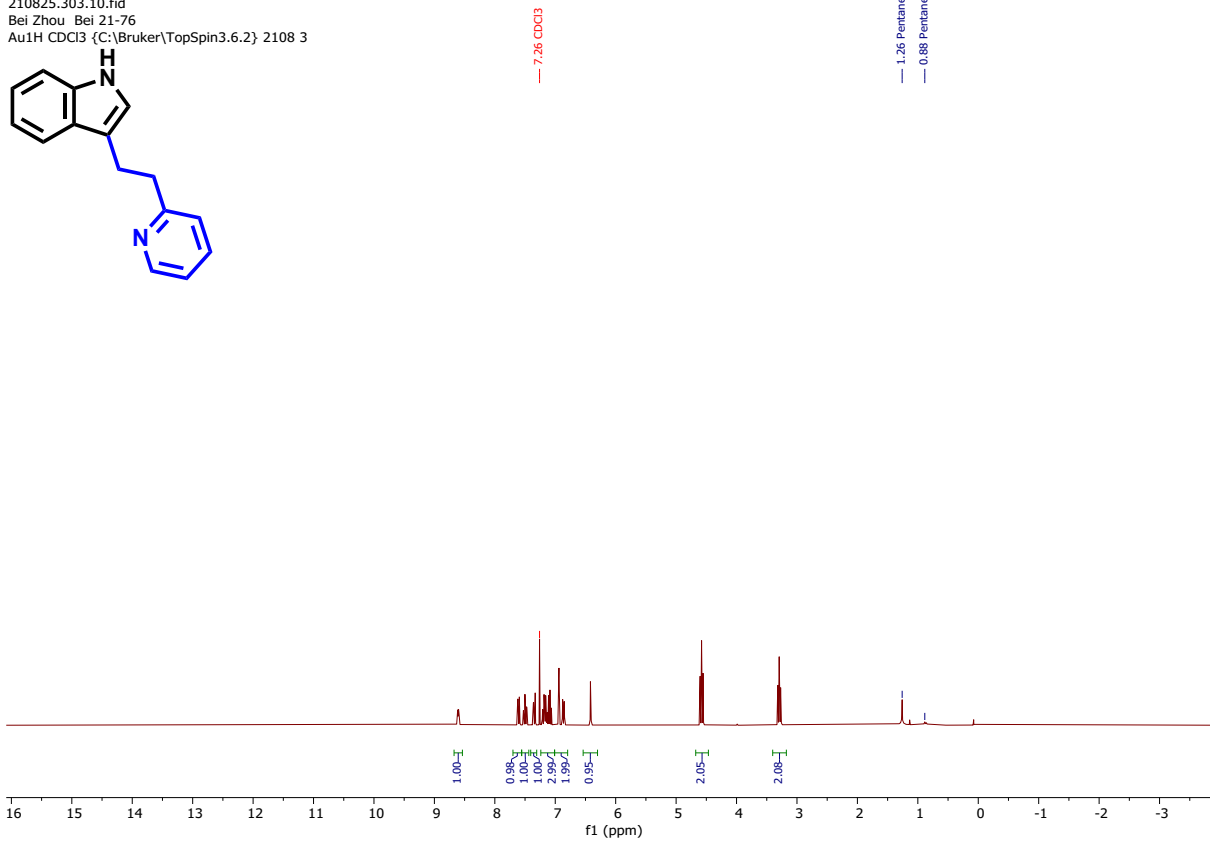

210825.303.11.fid  
Bei Zhou Bei 21-76  
Au13C CDCl3 {C:\Bruker\TopSpin3.6.2} 2108 3

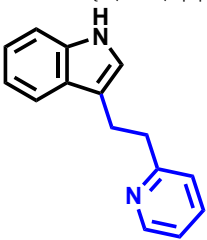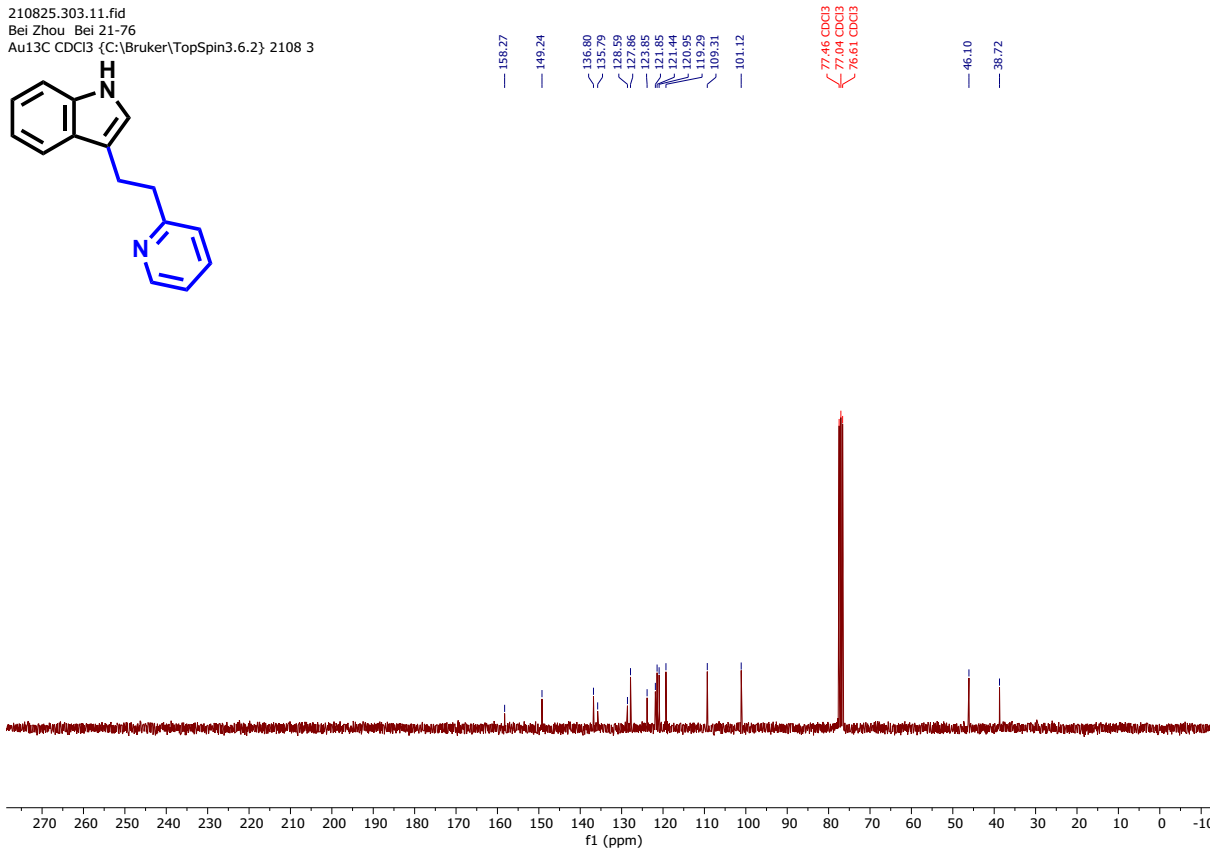

210722.f366.10.fid  
Bei Zhou Bei 21-37  
PROTON CDCl3 {C:\Bruker\TopSpin3.6.2} 2107 6

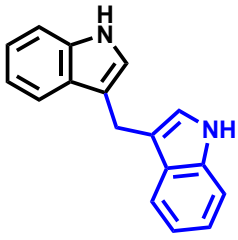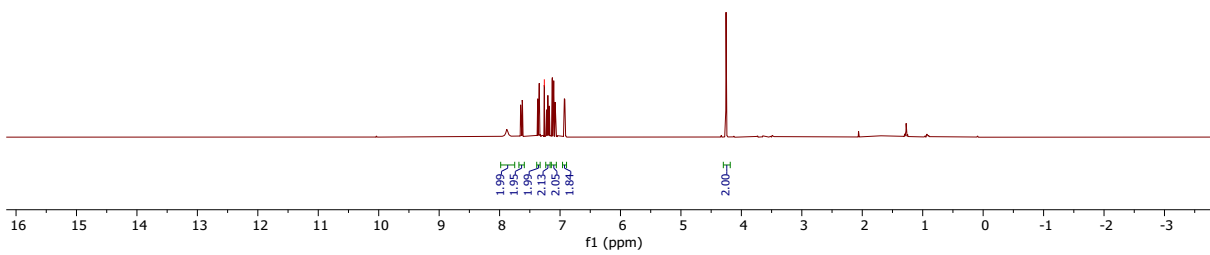

210722.f366.11.fid  
Bei Zhou Bei 21-37  
C13CPD CDCl3 {C:\Bruker\TopSpin3.6.2} 2107 6

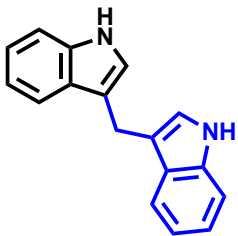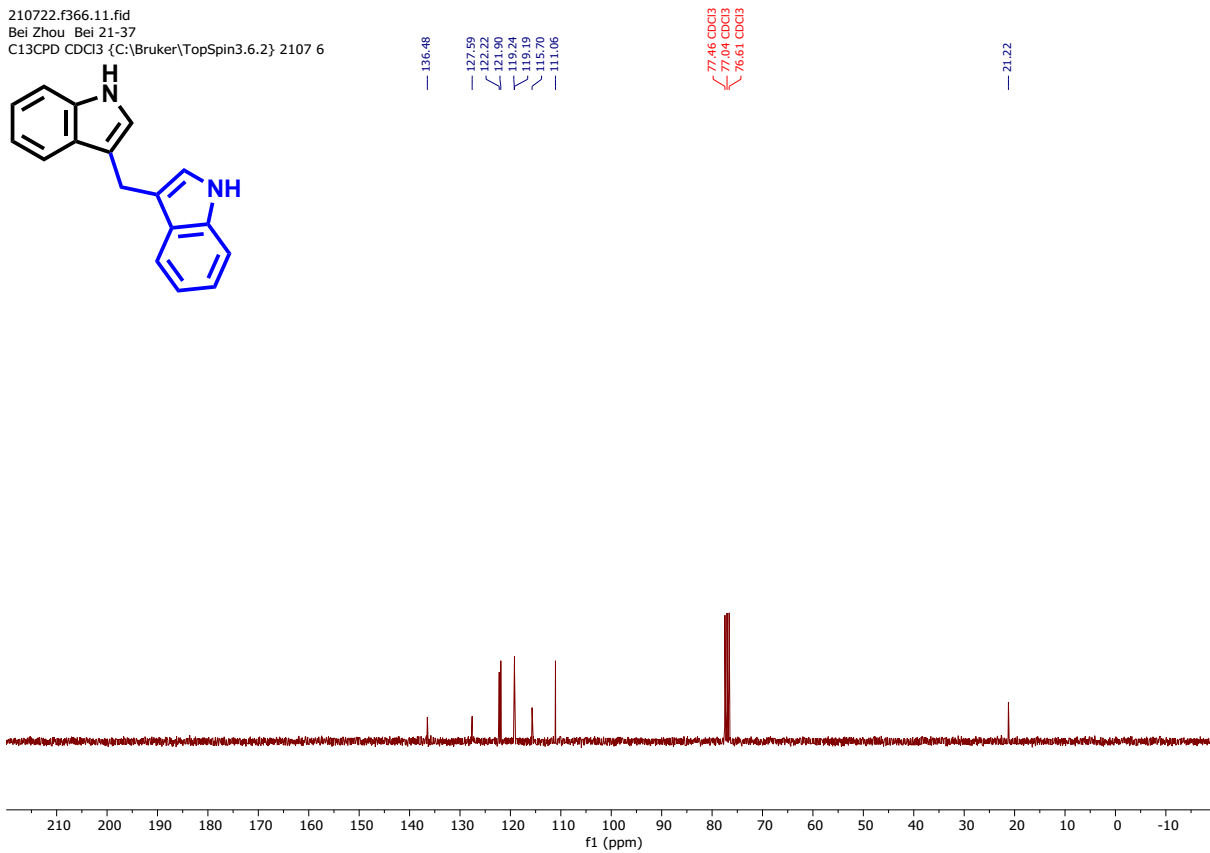

210804.325.10.fid  
Bei Zhou Bei 21-90  
Au1H CDCl3 {C:\Bruker\TopSpin3.6.2} 2108 25

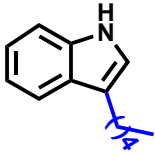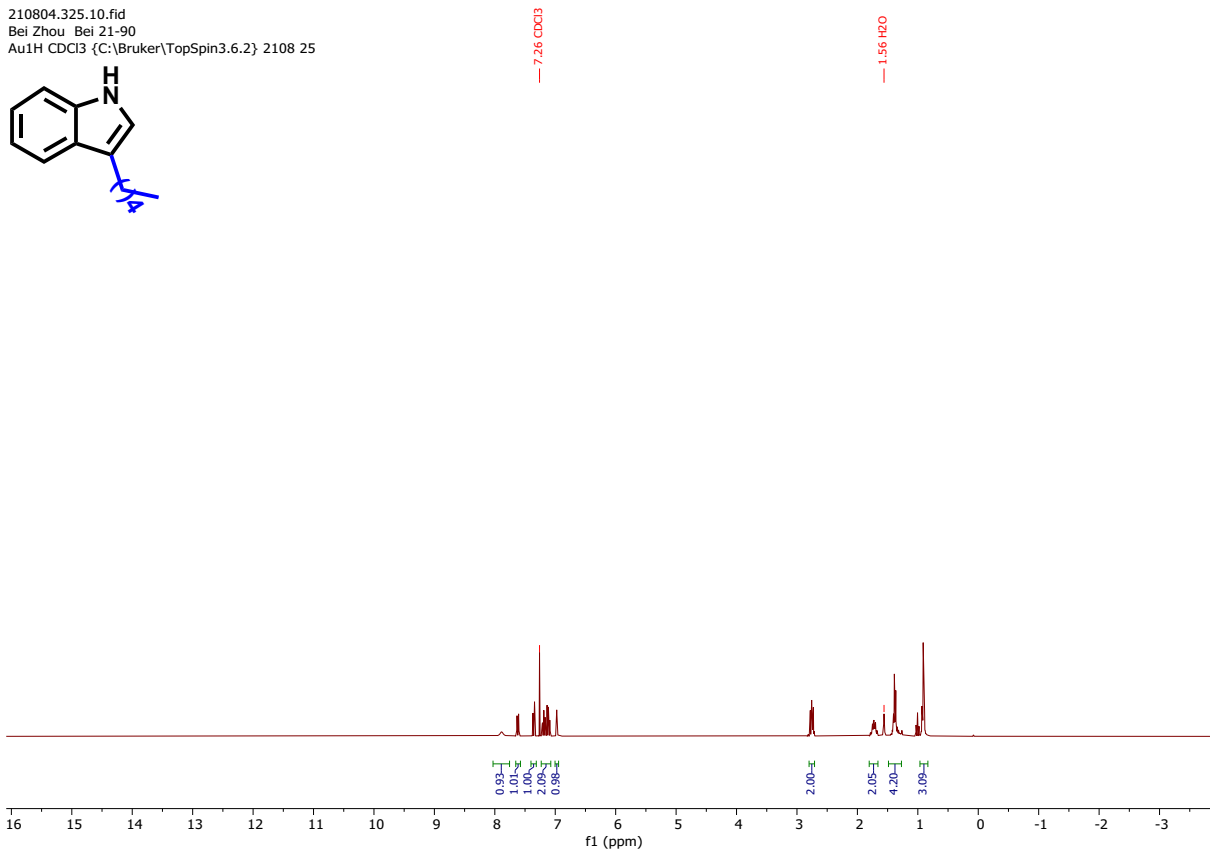

210804.325.11.fid  
Bei Zhou Bei 21-90  
Au13C CDCl3 {C:\Bruker\TopSpin3.6.2} 2108 25

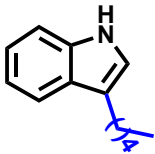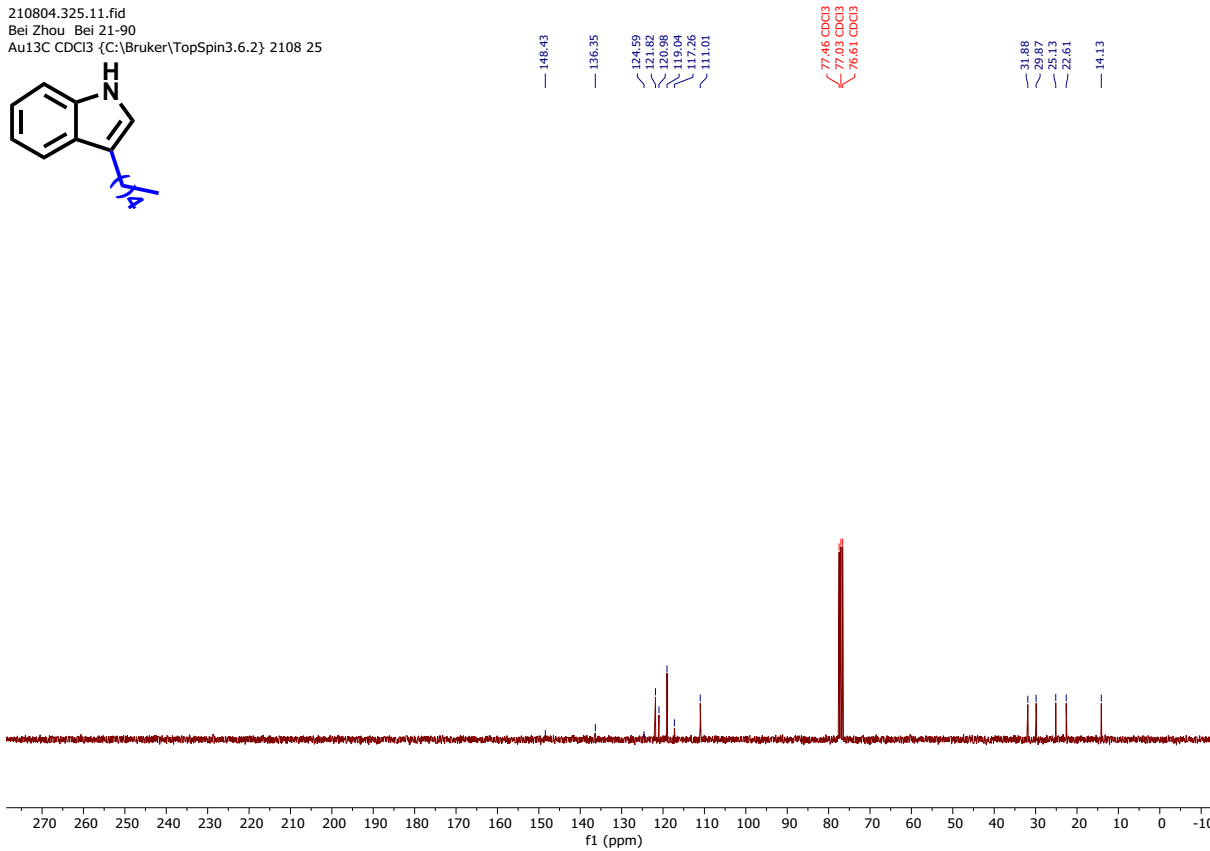



210804.333.10.fid  
Bei Zhou Bei 21-54-2  
Au1H CDCl3 {C:\Bruker\TopSpin3.6.2} 2108 33

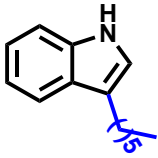

— 7.26 CDCl3

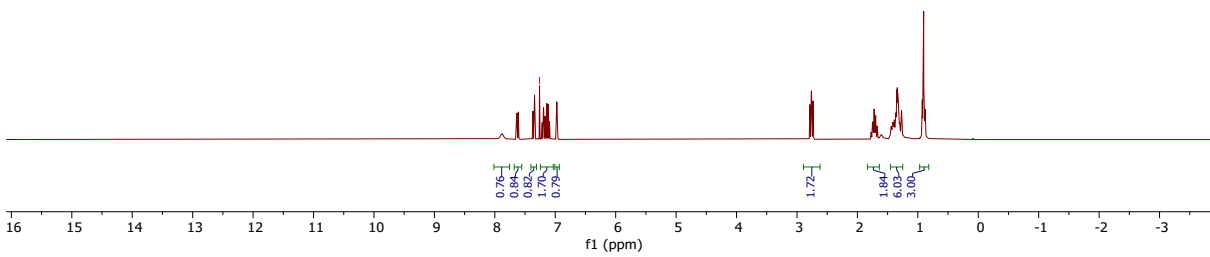

210804.333.11.fid  
Bei Zhou Bei 21-54-2  
Au13C CDCl3 {C:\Bruker\TopSpin3.6.2} 2108 33

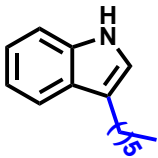

136.35  
228.25  
127.66  
120.88  
119.04  
117.26  
111.01

77.46 CDCl3  
77.00 CDCl3  
76.62 CDCl3

31.81  
29.57  
25.18  
22.72  
14.16

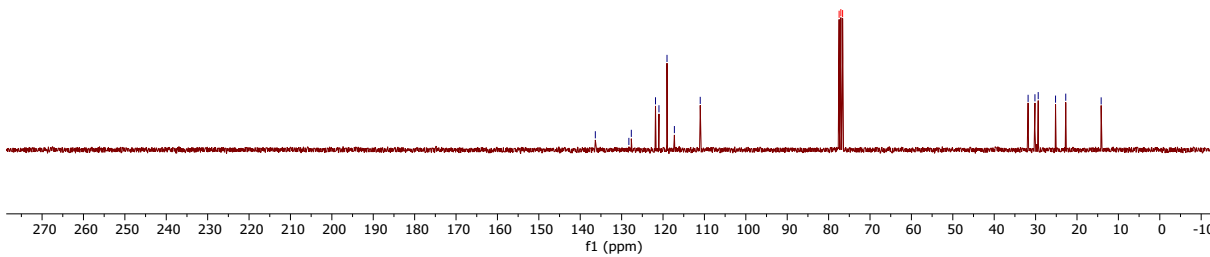

210831.f321.10.fid  
Bei Zhou 21-72  
PROTON CDCl3 {C:\Bruker\TopSpin3.6.2} 2108 21

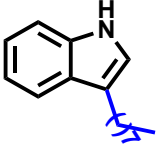

7.17 CDCl3

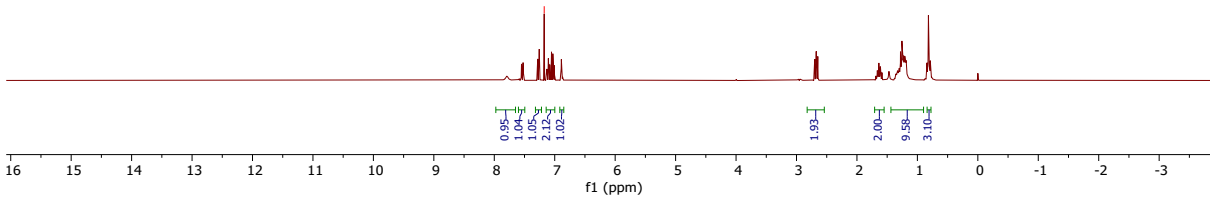

210831.f321.11.fid  
Bei Zhou 21-72  
C13CPD CDCl3 {C:\Bruker\TopSpin3.6.2} 2108 21

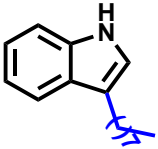

136.37

127.67

131.82

120.87

119.04

117.27

111.00

77.45 CDCl3

77.03 CDCl3

76.61 CDCl3

31.81

30.16

29.70

29.55

29.36

25.18

22.71

14.14

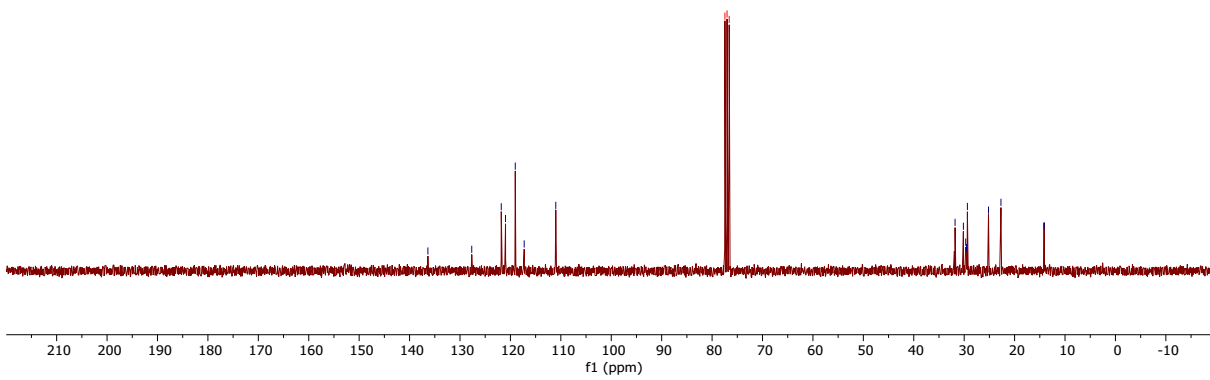

210826.314.10.fid  
Bei Zhou 21-68  
Au1H CDCl3 {C:\Bruker\TopSpin3.6.2} 2108 14

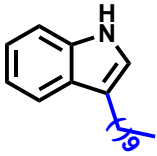

— 77.26 CDCl3

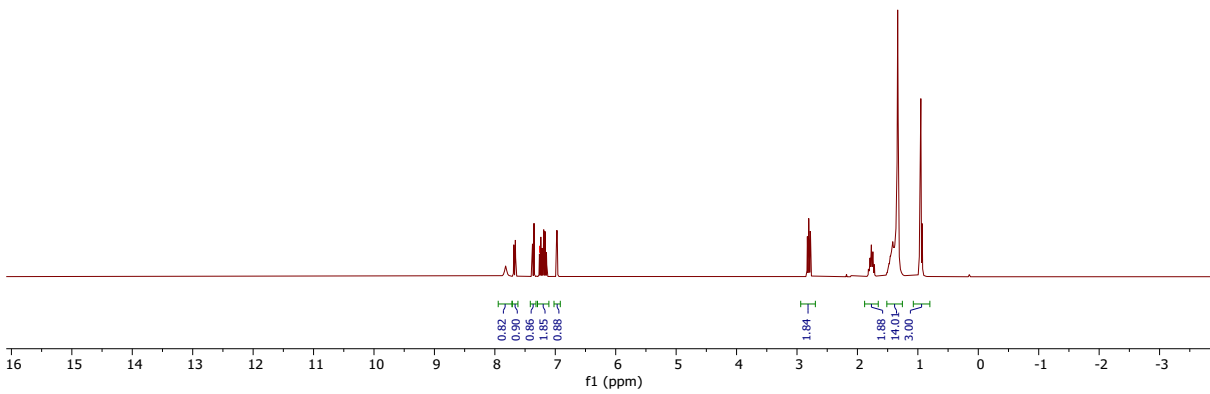

210826.314.11.fid  
Bei Zhou 21-68  
Au13C CDCl3 {C:\Bruker\TopSpin3.6.2} 2108 14

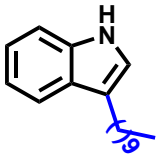

— 136.39  
— 127.70  
— 121.85  
— 121.05  
— 119.08  
— 117.24  
— 111.08

77.53 CDCl3  
77.26 CDCl3  
76.68 CDCl3

32.01  
30.26  
29.77  
29.75  
29.66  
29.45  
25.23  
22.78  
14.21

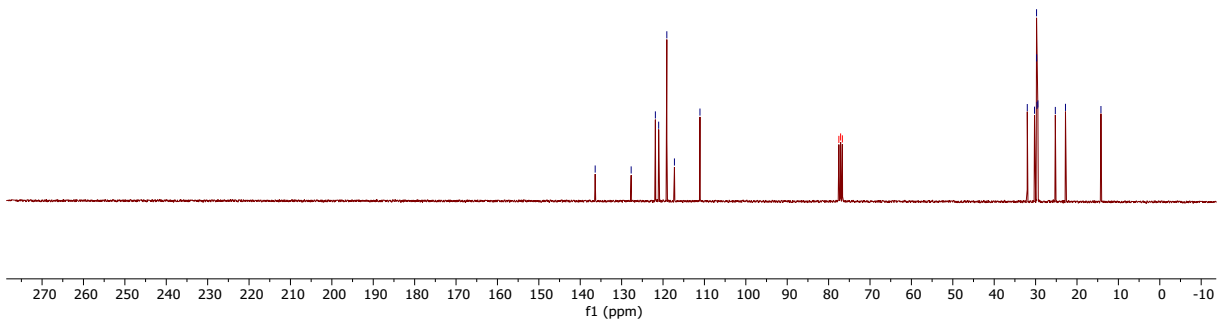

210519.455.10.fid  
Zhou/ Bei-21-44  
Au1H CDCl3 {C:\Bruker\TopSpin3.5pl6} 2105 55

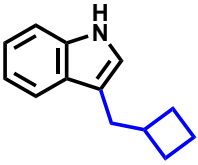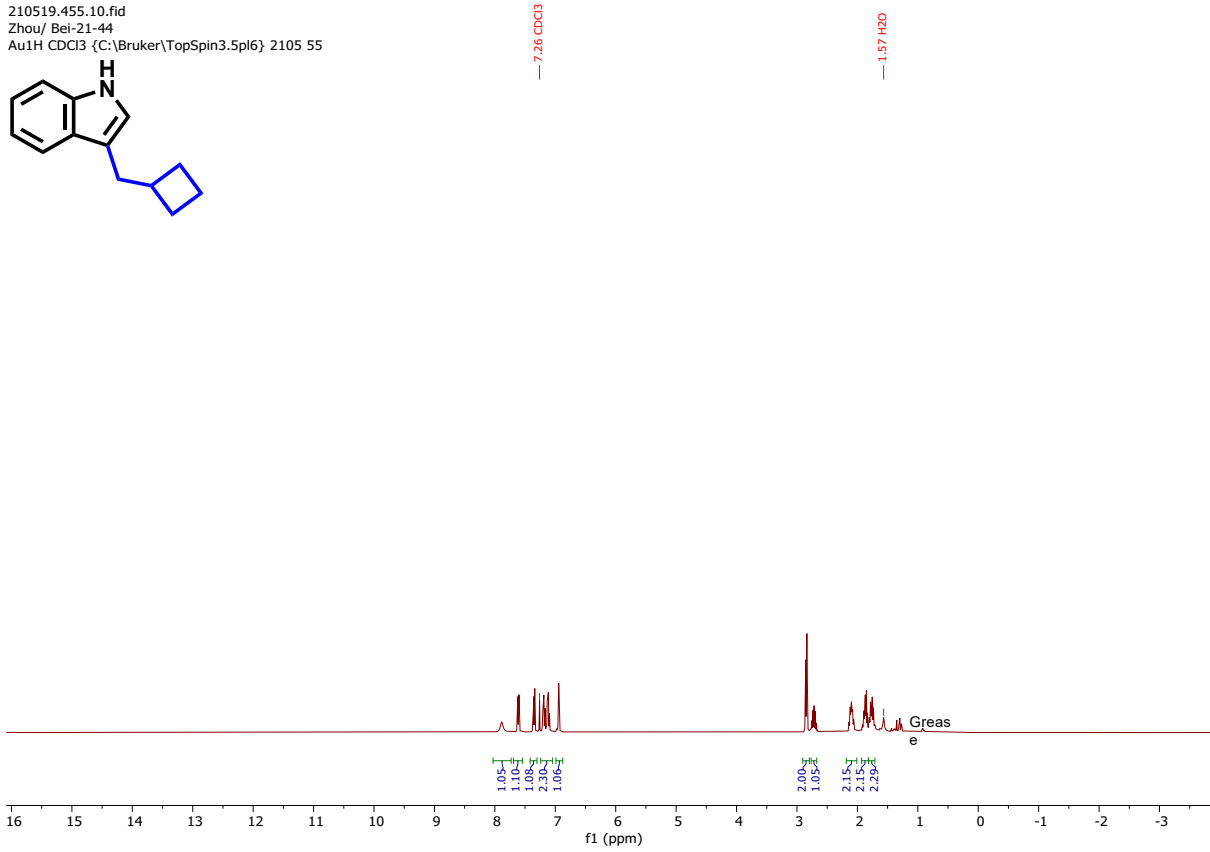

210519.455.11.fid  
Zhou/ Bei-21-44  
Au13C CDCl3 {C:\Bruker\TopSpin3.5pl6} 2105 55

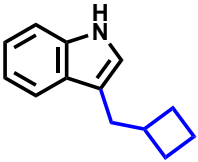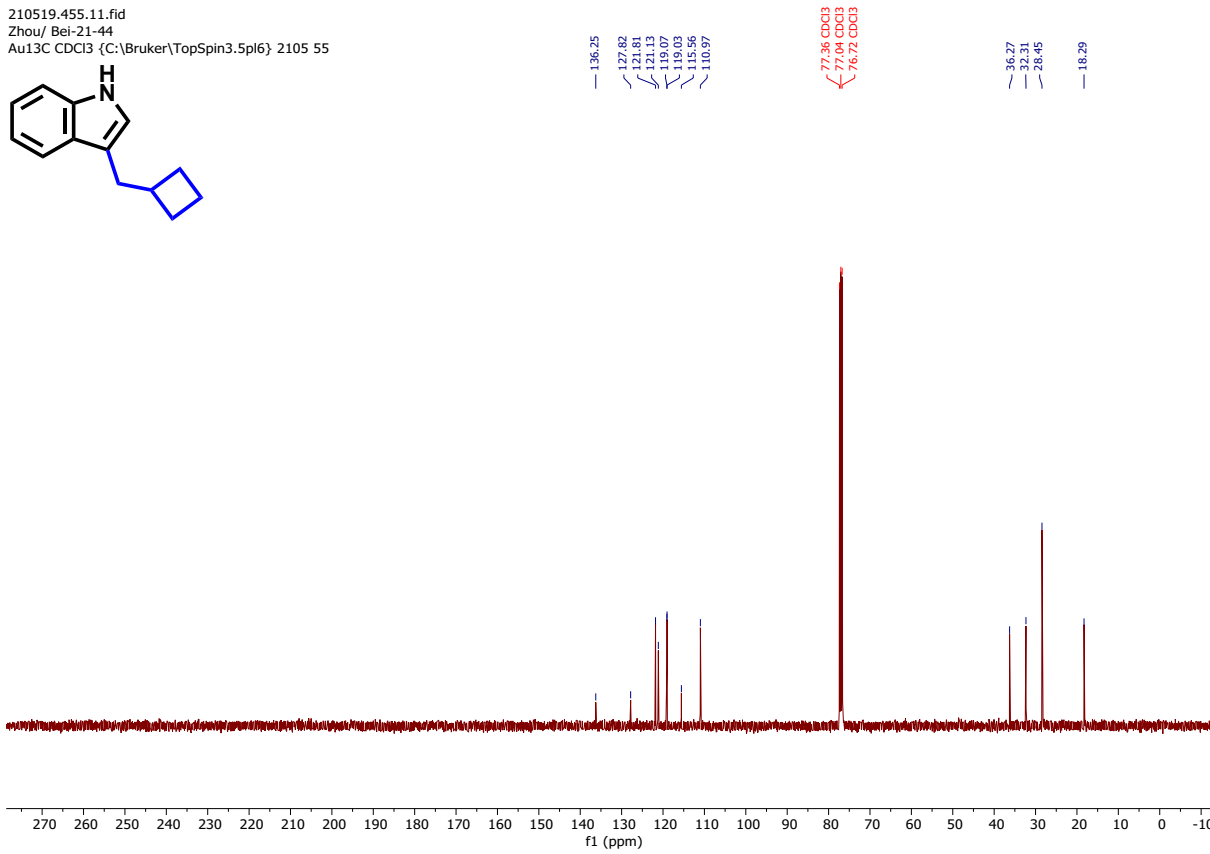

210802.313.10.fid  
Bei Zhou Bei 21-67  
Au1H CDCl3 {C:\Bruker\TopSpin3.6.2} 2108 13

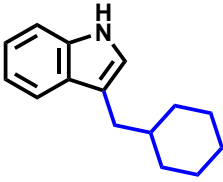

— 7.26 CDCl3

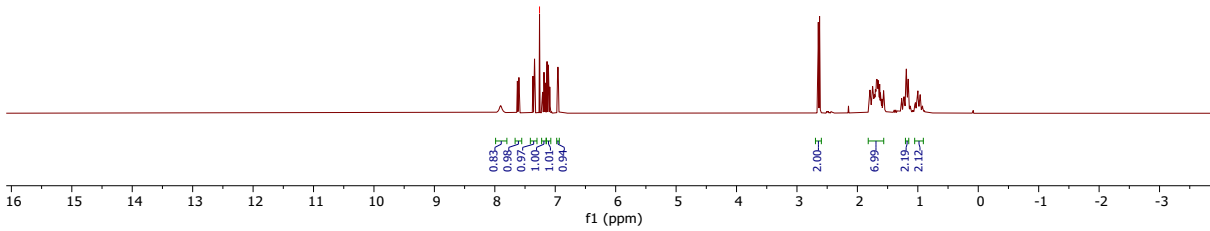

210802.313.11.fid  
Bei Zhou Bei 21-67  
Au13C CDCl3 {C:\Bruker\TopSpin3.6.2} 2108 13

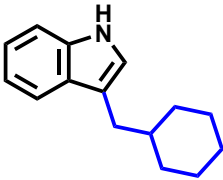

136.27  
128.08  
121.98  
119.24  
119.01  
115.53  
110.98

77.46 CDCl3  
77.00 CDCl3  
76.62 CDCl3

38.80  
33.57  
33.13  
26.66  
26.40

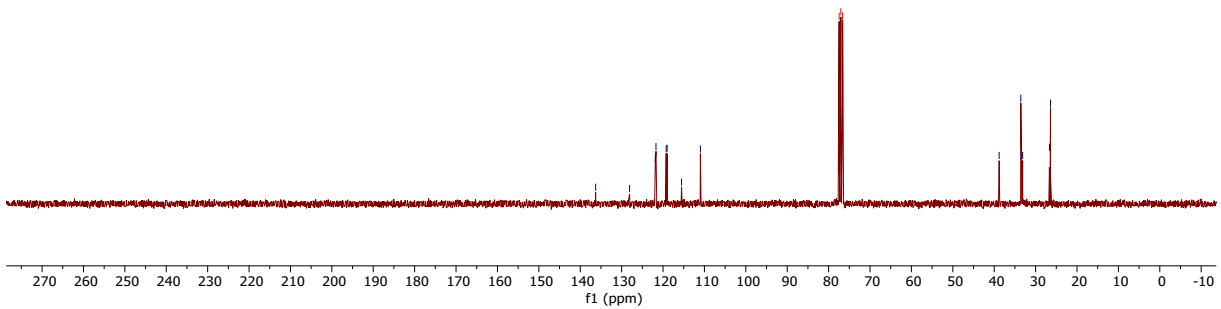

210702.f338.10.fid  
Bei Zhou Bei 20-1  
PROTON CDCl3 {C:\Bruker\TopSpin3.6.2} 2107 38

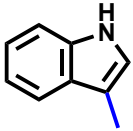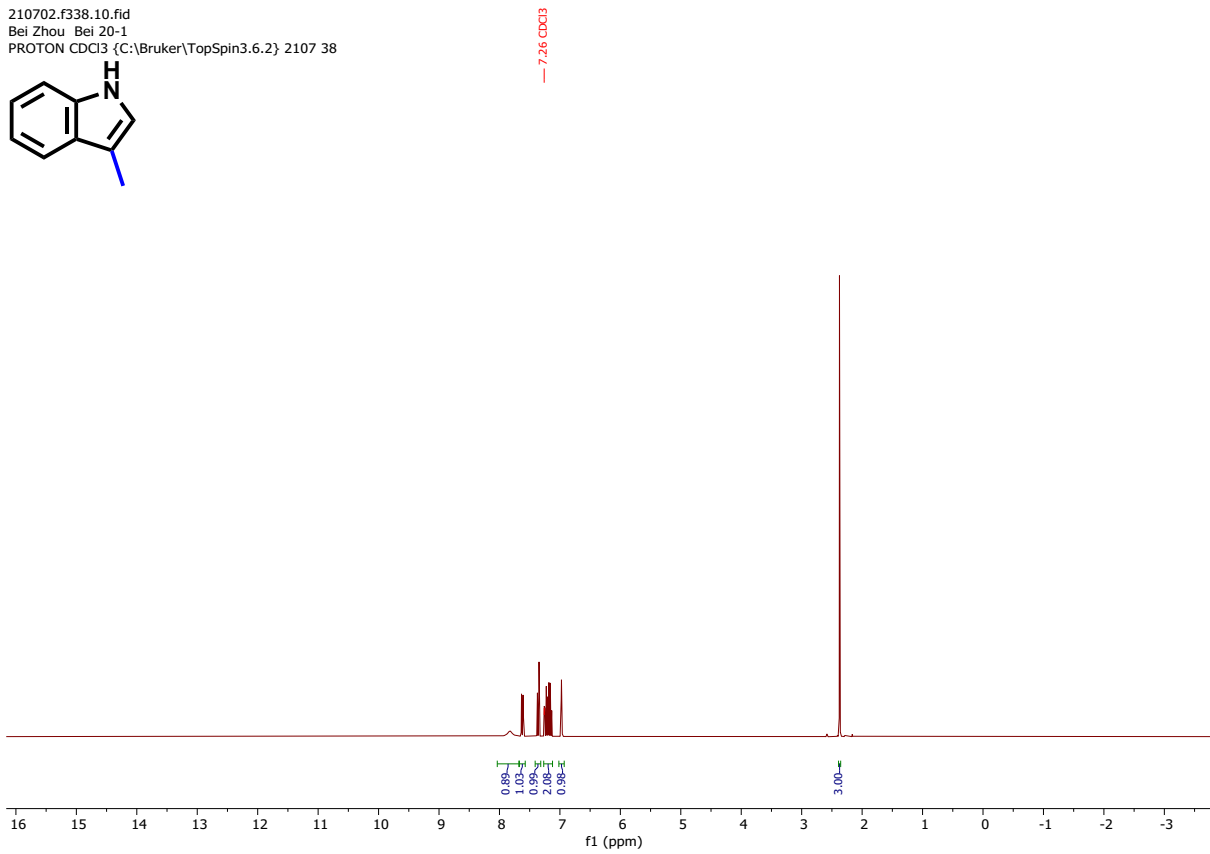

210702.f338.11.fid  
Bei Zhou Bei 20-1  
C13CPD CDCl3 {C:\Bruker\TopSpin3.6.2} 2107 38

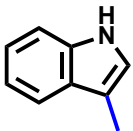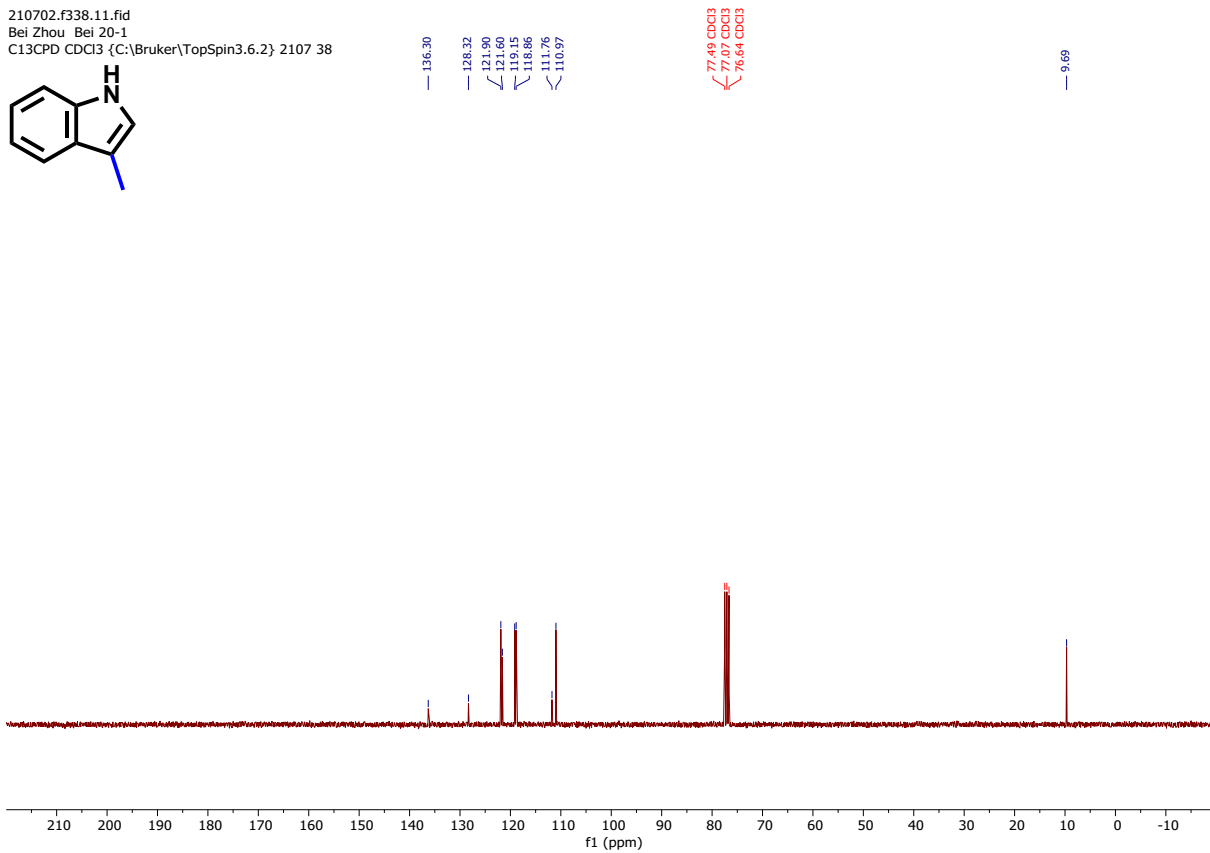

210825.301.10.fid  
Bei Zhou Bei 20-3  
Au1H CDCl3 {C:\Bruker\TopSpin3.6.2} 2108 1

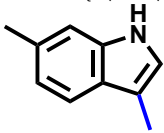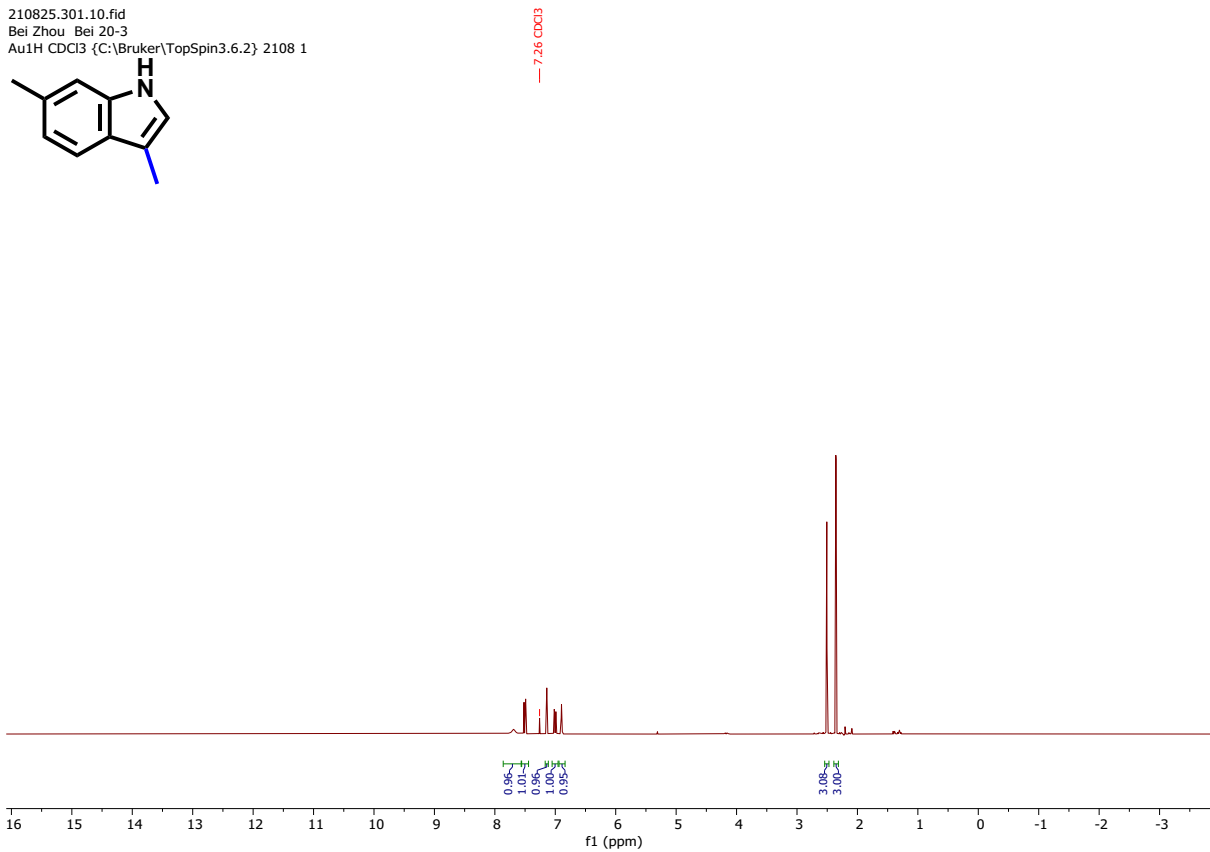

210825.301.11.fid  
Bei Zhou Bei 20-3  
Au13C CDCl3 {C:\Bruker\TopSpin3.6.2} 2108 1

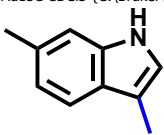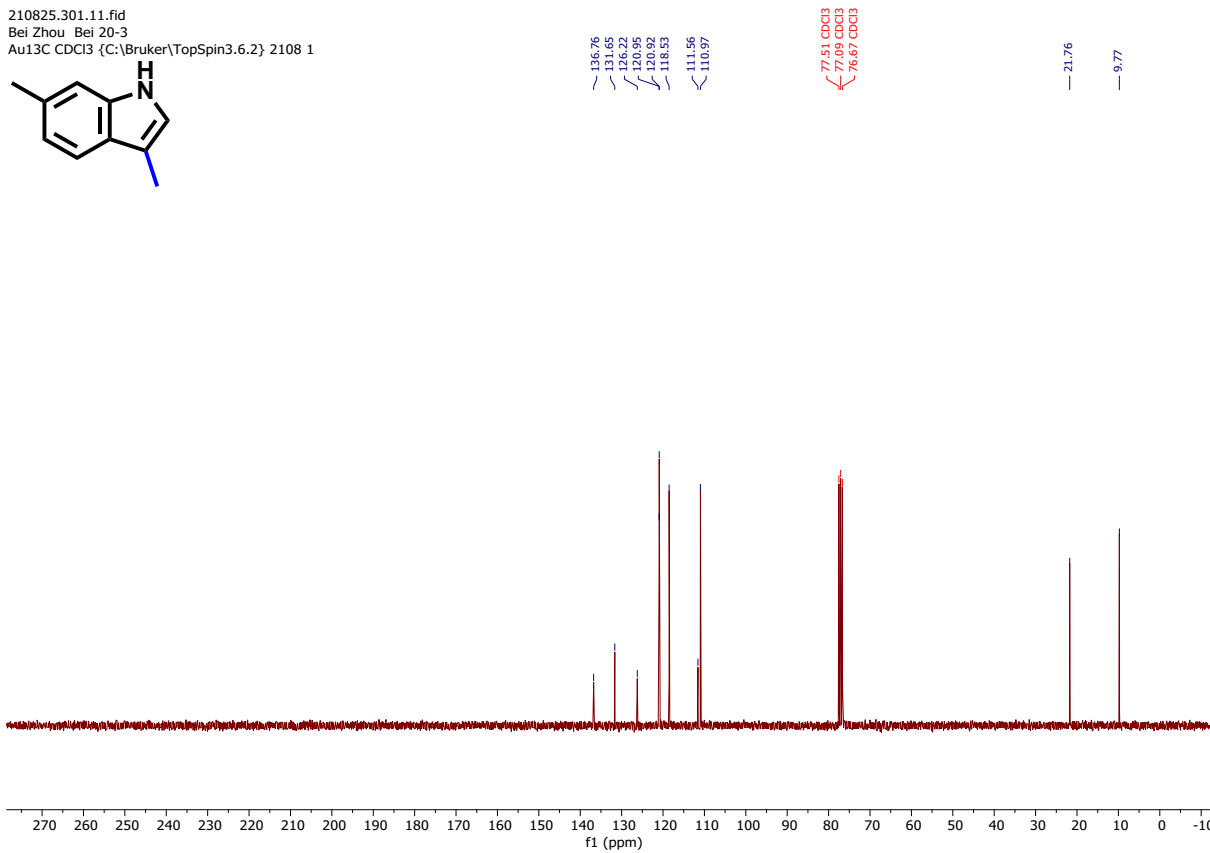

210825.305.10.fid  
Bei Zhou Bei 20-5  
Au1H CDCl3 {C:\Bruker\TopSpin3.6.2} 2108 5

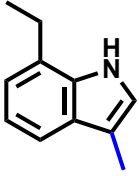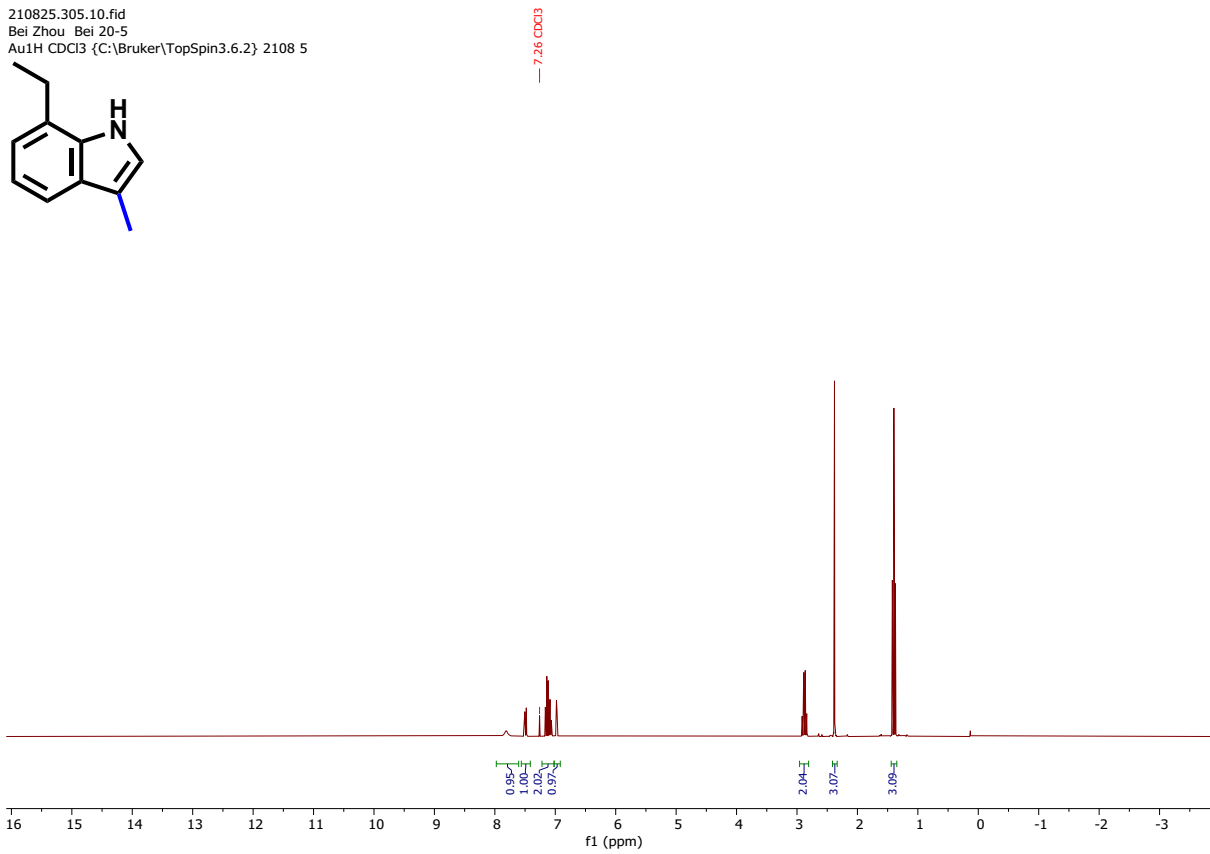

210825.305.11.fid  
Bei Zhou Bei 20-5  
Au13C CDCl3 {C:\Bruker\TopSpin3.6.2} 2108 5

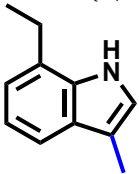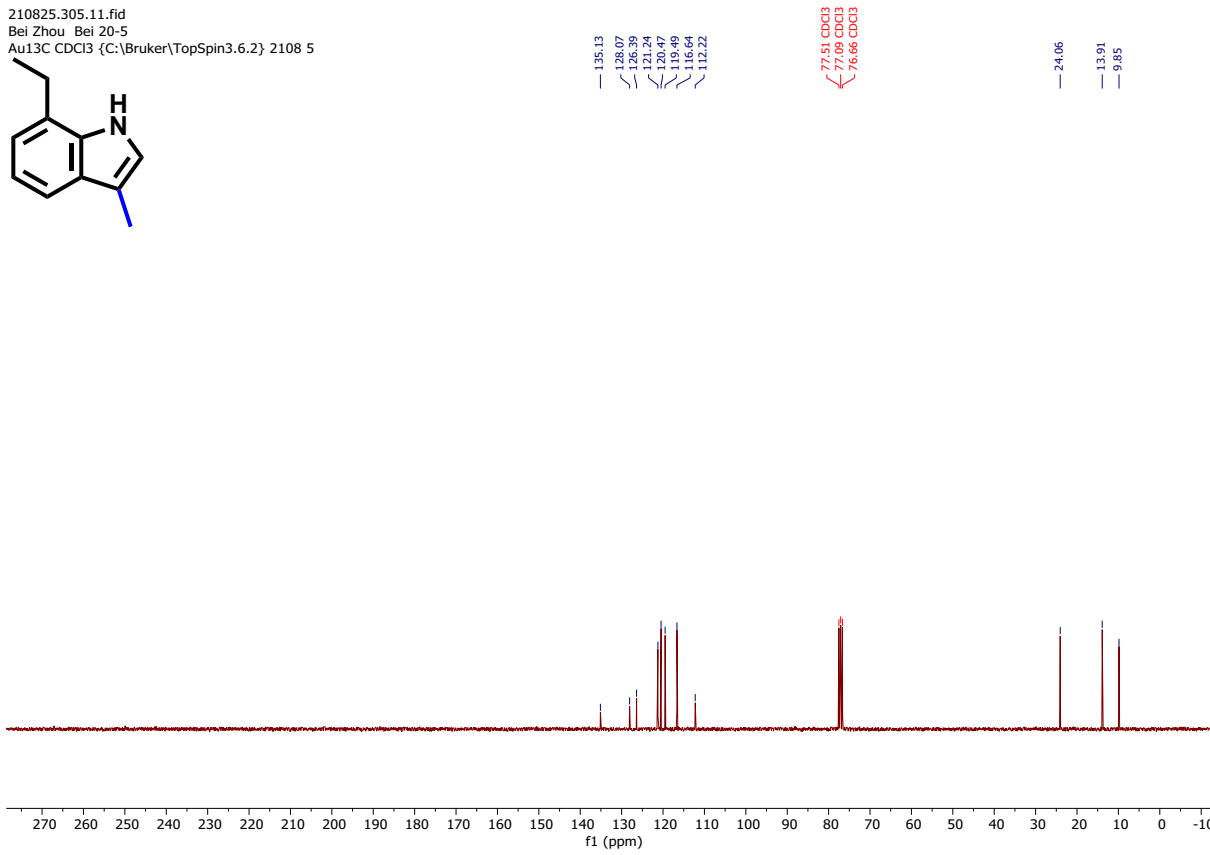



210825.304.10.fid  
Bei Zhou Bei 20-4  
Au1H CDCl3 {C:\Bruker\TopSpin3.6.2} 2108 4

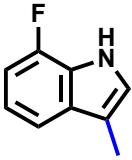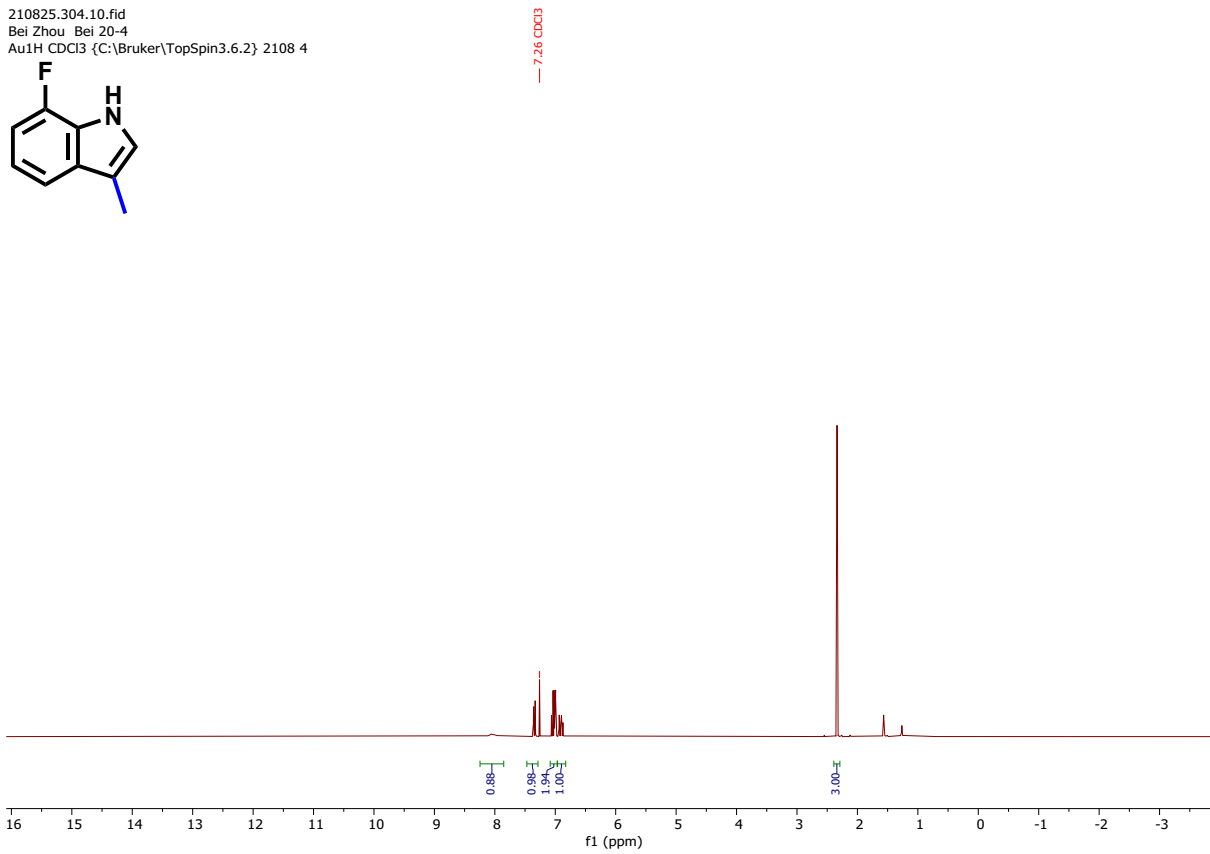

210825.304.11.fid  
Bei Zhou Bei 20-4  
Au13C CDCl3 {C:\Bruker\TopSpin3.6.2} 2108 4

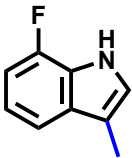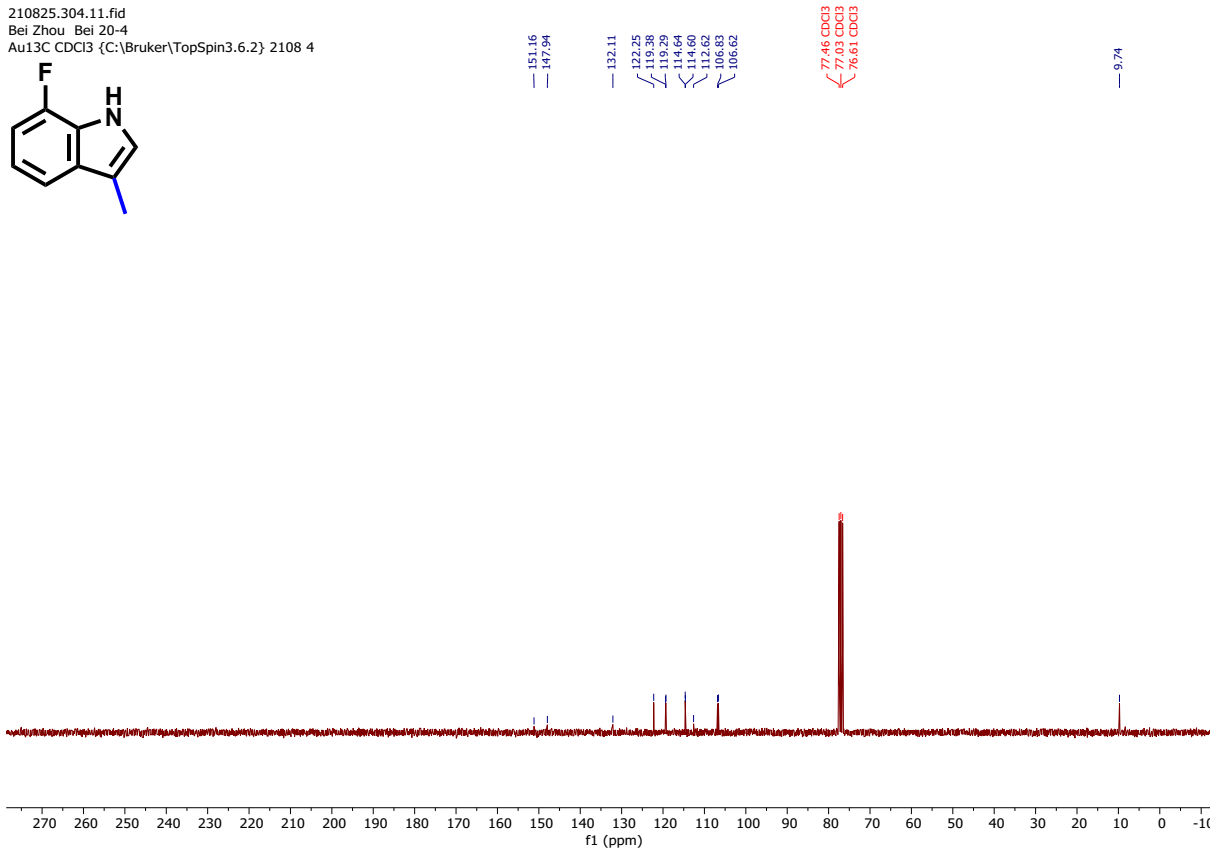

210826.310.10.fid  
Bei Zhou 20-4  
Au19F CDCl3 {C:\Bruker\TopSpin3.6.2} 2108 10

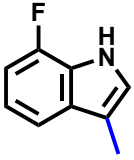

135.81  
135.83  
135.85  
135.87

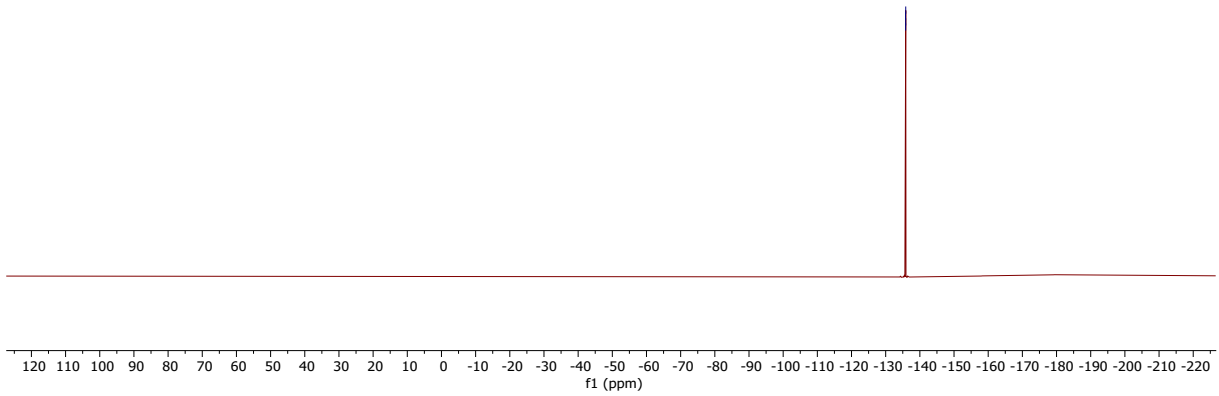

210906.301.10.fid  
Bei Zhou Bei 20-7  
Au1H CDCl3 {C:\Bruker\TopSpin3.6.2} 2109 1

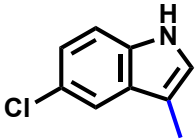

7.26 CDCl3

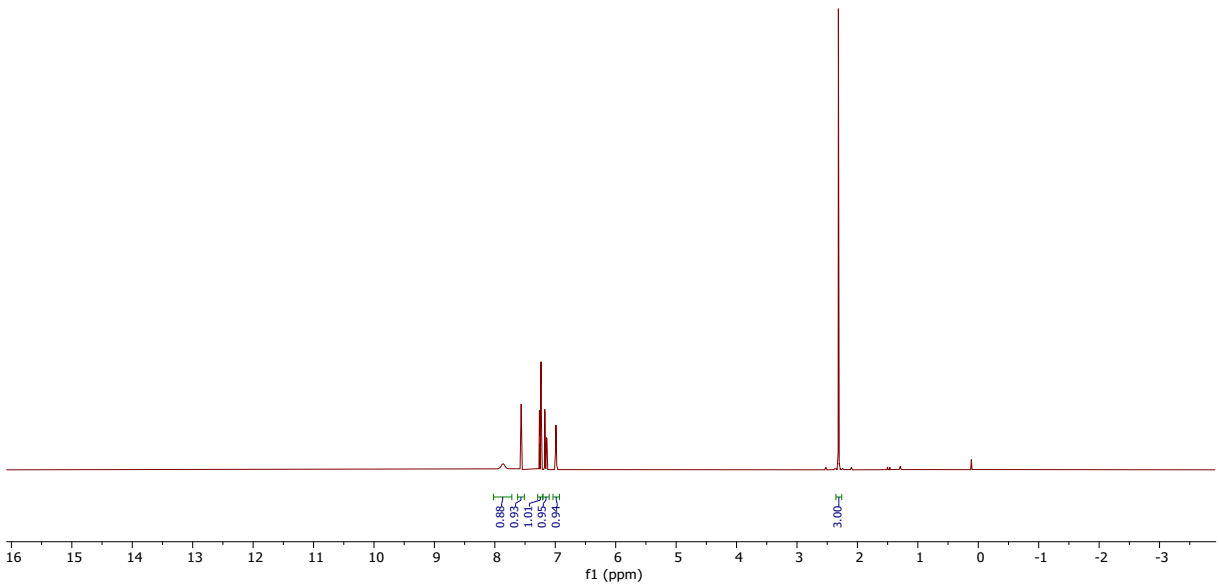

210906.301.11.fid  
Bei Zhou Bei 20-7  
Au13C CDCl3 {C:\Bruker\TopSpin3.6.2} 2109 1

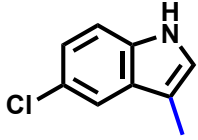

134.60  
129.46  
124.89  
123.07  
122.14  
118.44  
111.98  
111.58

77.51 CDCl3  
77.26 CDCl3  
76.68 CDCl3

9.57

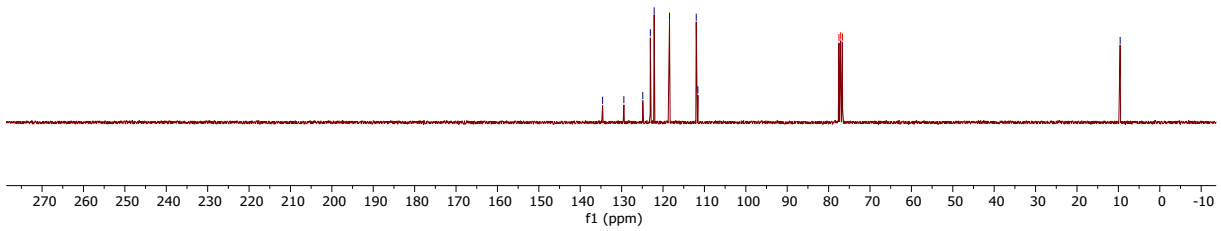

210826.311.10.fid  
Bei Zhou 20-6  
Au1H CDCl3 {C:\Bruker\TopSpin3.6.2} 2108 11

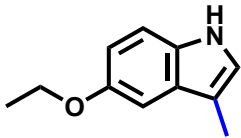

7.28 CDCl3

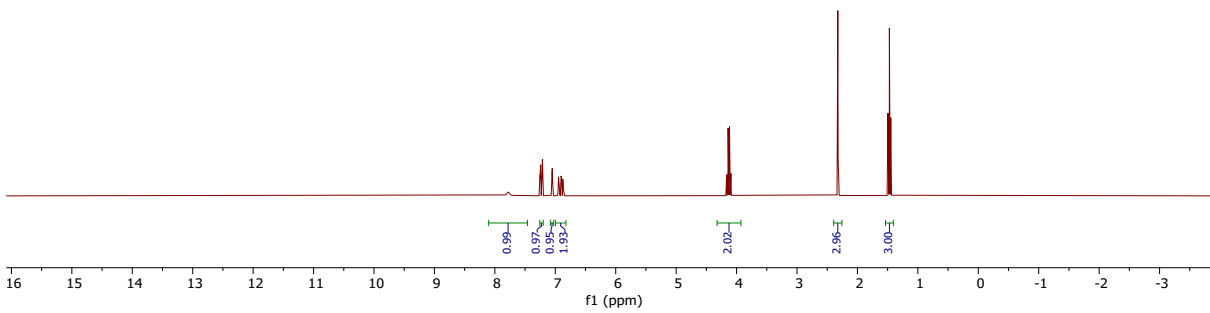

210826.311.11.fid  
Bei Zhou 20-6  
Au13C CDCl3 {C:\Bruker\TopSpin3.6.2} 2108 11

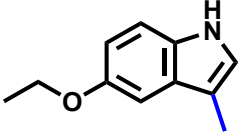

153.11  
131.59  
130.86  
122.48  
112.64  
111.66  
111.39  
101.96  
77.58 CDCl3  
77.26 CDCl3  
76.68 CDCl3  
64.33  
15.15  
9.76

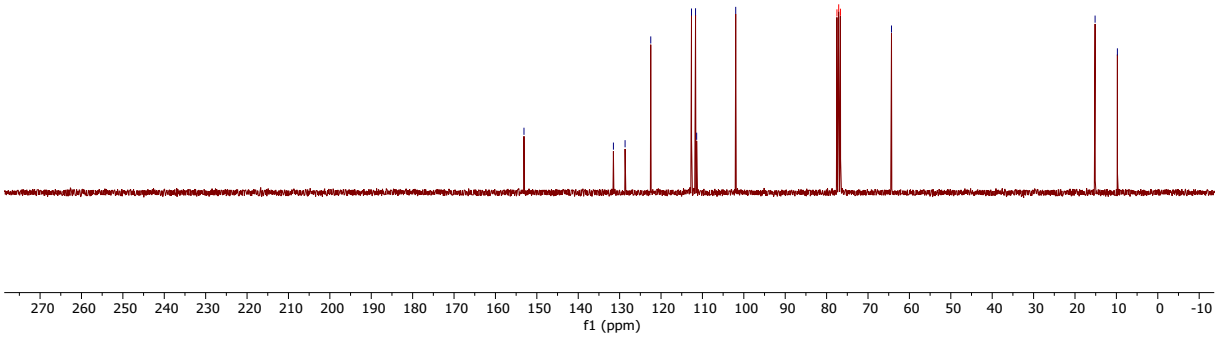

211018.314.10.fid  
Bei Zhou Bei 21-57  
Au1H CDCl3 {C:\Bruker\TopSpin3.6.2} 2110 14

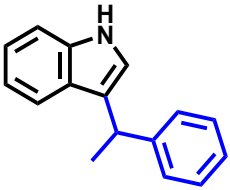

7.26 CDCl3

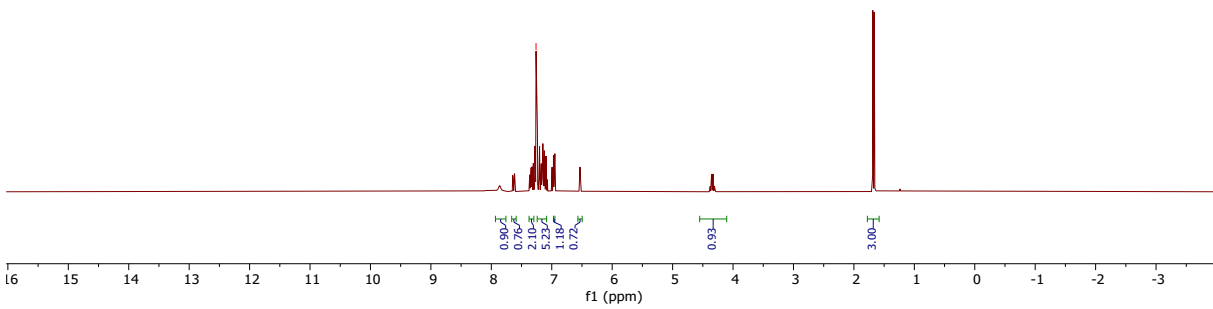

211018.314.11.fid  
Bei Zhou Bei 21-57  
Au13C CDCl3 {C:\Bruker\TopSpin3.6.2} 2110 14

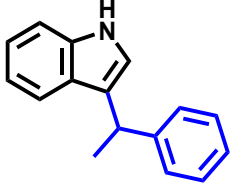

146.85  
136.65  
128.35  
127.49  
126.85  
124.87  
122.00  
121.12  
120.77  
119.24  
111.06  
102.65  
77.58 CDCl3  
77.00 CDCl3  
76.68 CDCl3  
36.98  
22.45

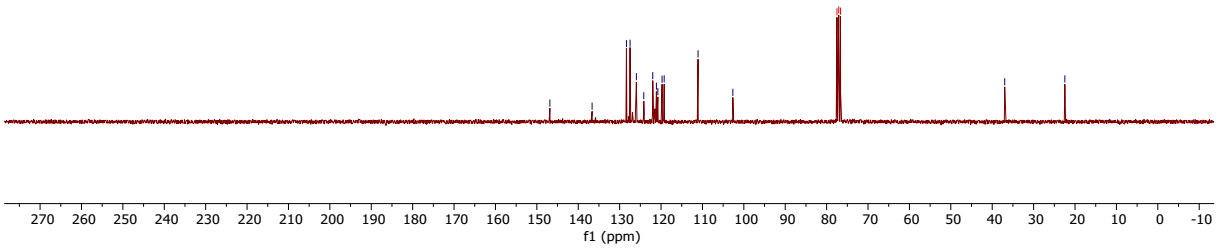

210818.302.10.fid  
Bei Zhou Bei 21-6-1  
Au1H CDCl3 {C:\Bruker\TopSpin3.6.2} 2108 2

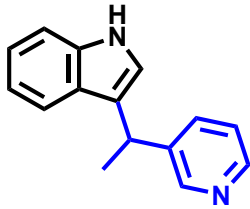

7.26 CDCl3

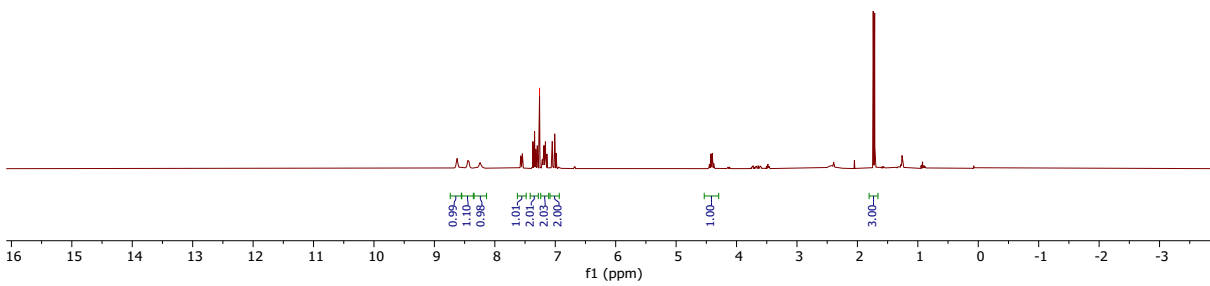

210818.302.11.fid  
Bei Zhou Bei 21-6-1  
Au13C CDCl3 {C:\Bruker\TopSpin3.6.2} 2108 2

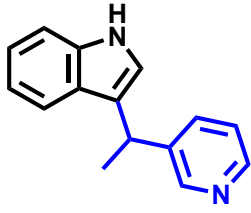

148.89  
147.87  
136.70  
132.46  
123.47  
123.55  
122.23  
121.27  
119.96  
119.44  
111.22

77.46 CDCl3  
77.00 CDCl3  
76.62 CDCl3

34.55

22.11

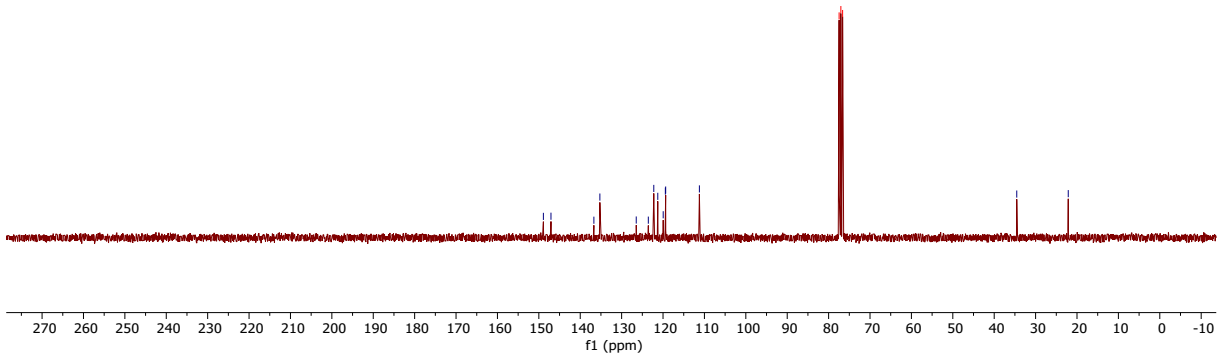

210819.f323.10.fid  
Bei Zhou Bei 21-7-1  
PROTON CDCl3 {C:\Bruker\TopSpin3.6.2} 2108 23

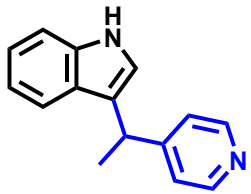

7.26 CDCl3

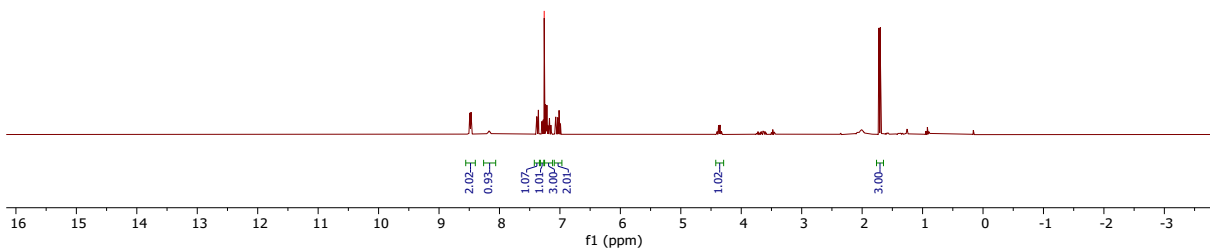

210819.f323.11.fid  
Bei Zhou Bei 21-7-1  
C13CPD CDCl3 {C:\Bruker\TopSpin3.6.2} 2108

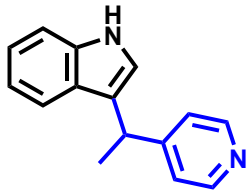

153.96 149.37  
123.01 122.32 121.36 119.51 119.31 111.23  
77.45 CDCl3 77.03 CDCl3 76.60 CDCl3  
36.45 21.56

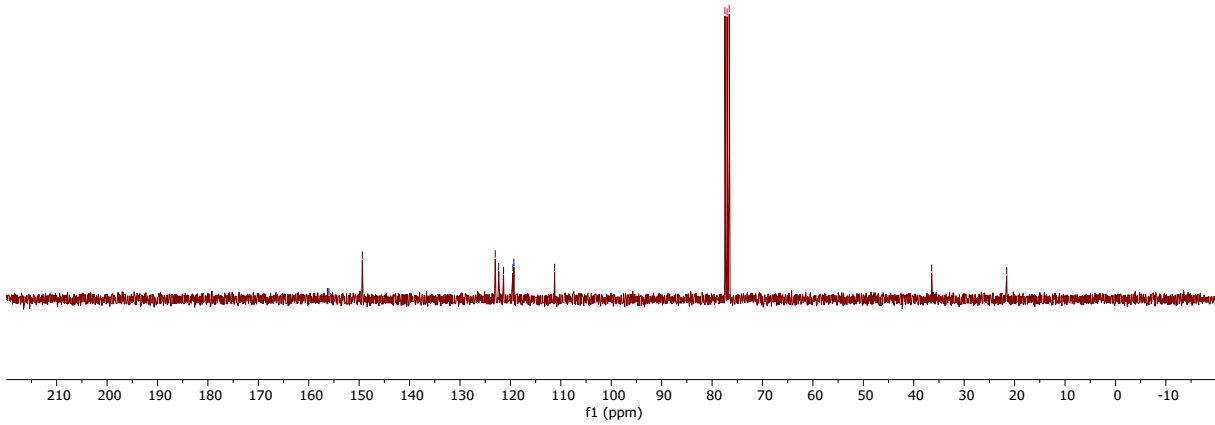

210805.327.10.fid  
Bei Zhou Bei 21-11  
Au1H CDCl3 {C:\Bruker\TopSpin3.6.2} 2108 27

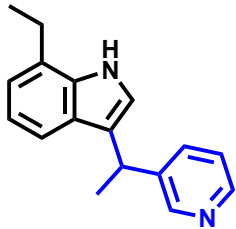

7.26 CDCl3

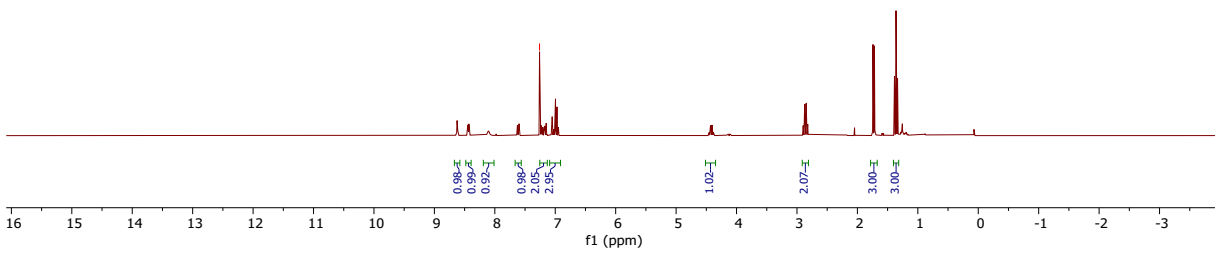

210805.327.11.fid  
Bei Zhou Bei 21-11  
Au13C CDCl3 {C:\Bruker\TopSpin3.6.2} 2108 27

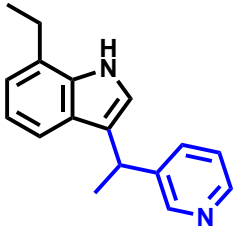

156.86  
148.29  
146.40  
138.47  
135.88  
126.61  
123.70  
120.86  
120.83  
120.28  
119.63  
117.04  
77.46 CDCl3  
77.00 CDCl3  
76.61 CDCl3  
34.64  
23.99  
22.07  
13.79

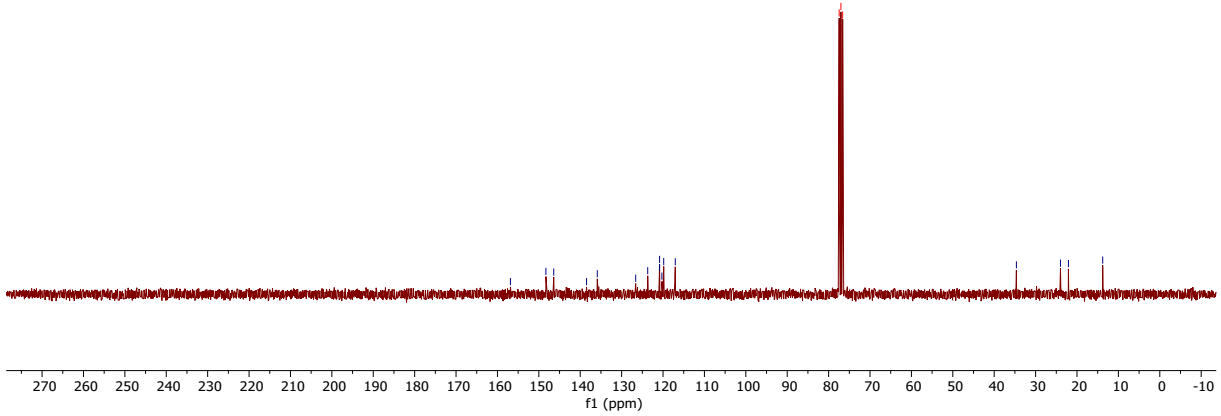

210715.f315.10.fid  
Bei Zhou 21-1-2  
PROTON CDCl3 {C:\Bruker\TopSpin3.6.2} 2107 15

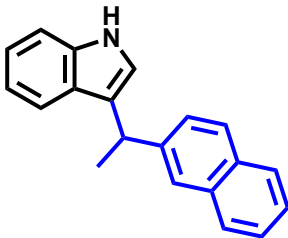

7.26 CDCl3  
1.56 H2O

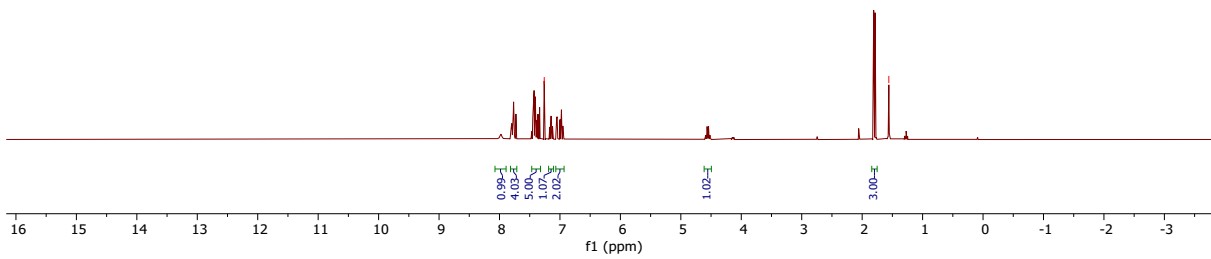



210715.f315.11.fid  
Bei Zhou 21-1-2  
C13CPD CDCl3 {C:\Bruker\TopSpin3.6.2} 2107

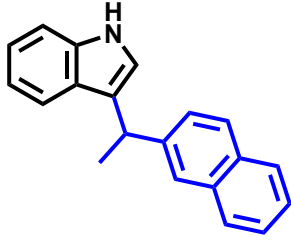

144.22  
139.85  
137.85  
132.22  
127.91  
127.72  
127.58  
126.95  
126.96  
125.30  
125.16  
122.01  
121.38  
121.22  
119.73  
119.27  
111.01

77.45 CDCl3  
77.03 CDCl3  
76.61 CDCl3

37.09

22.30

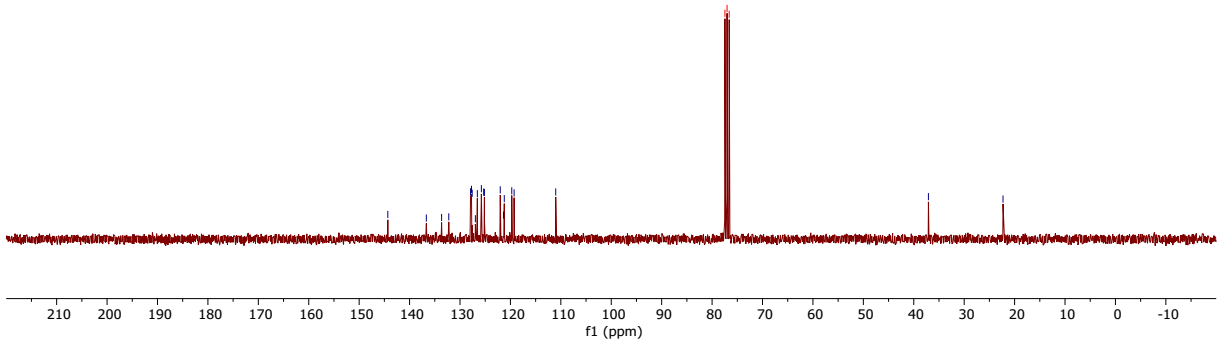

210628.317.10.fid  
Bei Zhou Bei 21-112  
Au1H CDCl3 {C:\Bruker\TopSpin3.6.2} 2106 17

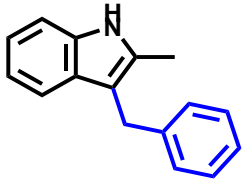

7.26 CDCl3

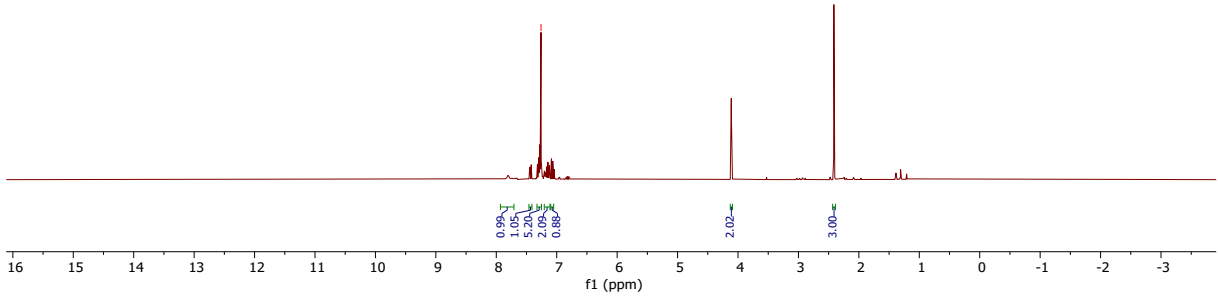

210628.317.11.fid  
Bei Zhou Bei 21-112  
Au13C CDCl3 {C:\Bruker\TopSpin3.6.2} 2106 17

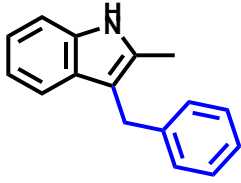

141.66  
131.56  
131.66  
128.93  
128.30  
127.18  
125.68  
121.02  
119.27  
118.84  
110.89  
110.15

77.46 CDCl3  
77.00 CDCl3  
76.64 CDCl3

30.12

11.83

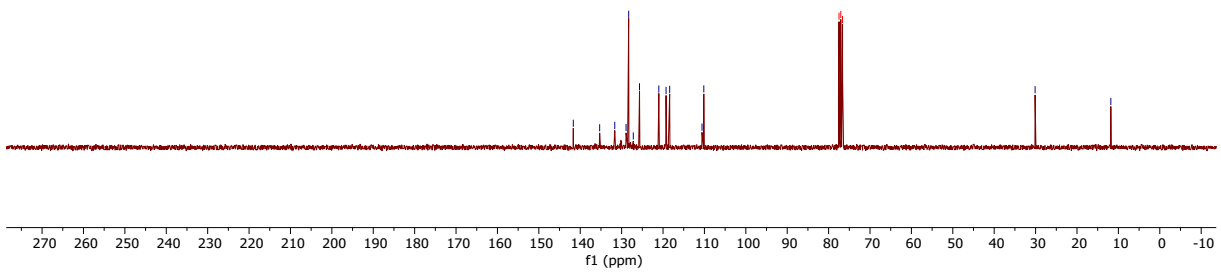

210621.434.10.fid  
Bei Zhou Bei 21-131  
Au1H CDCl3 {C:\Bruker\TopSpin3.5pl6} 2106 34

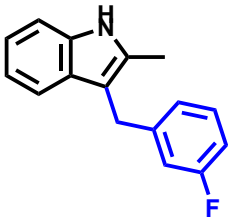

7.26 CDCl3

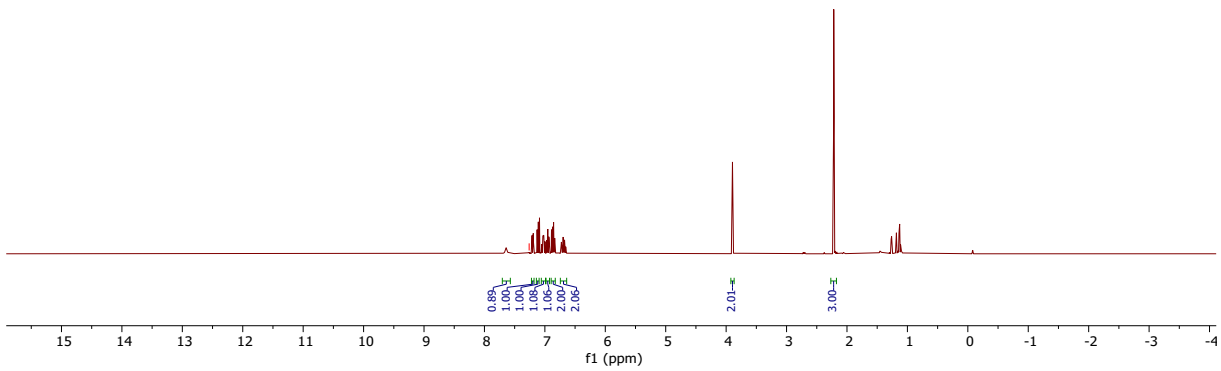

210621.434.11.fid  
Bei Zhou Bei 21-131  
Au13C CDCl3 {C:\Bruker\TopSpin3.5pl6} 2106 34

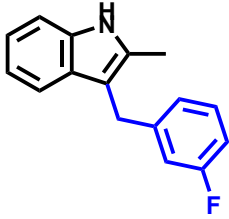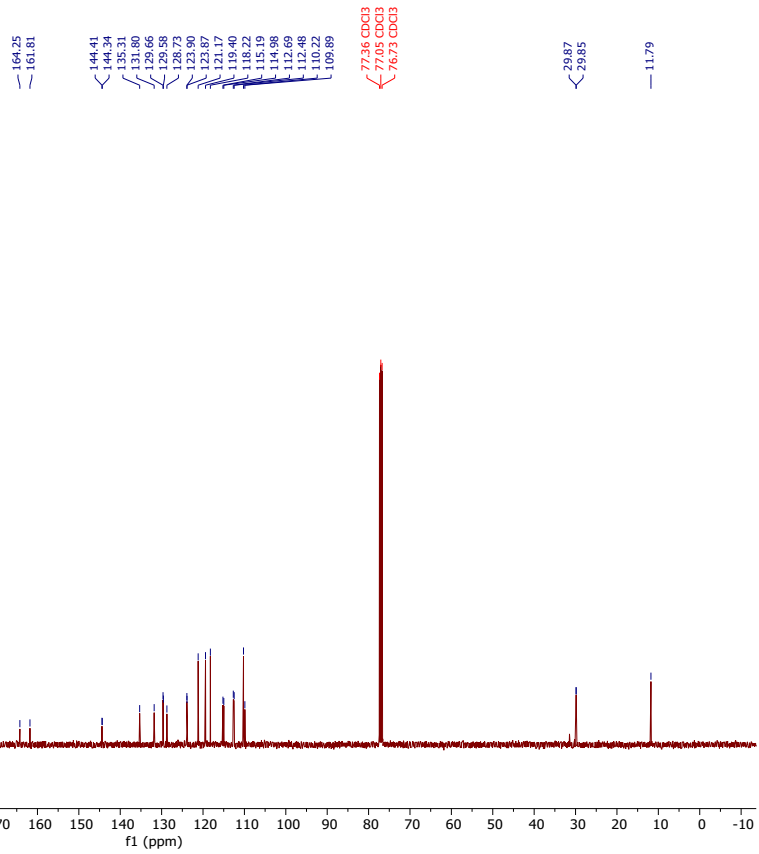

210624.f336.10.fid  
Bei Zhou Bei 21-131  
F19 CDCl3 {C:\Bruker\TopSpin3.6.2} 2106 36

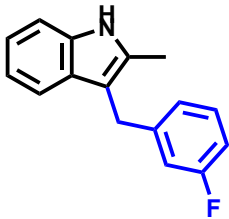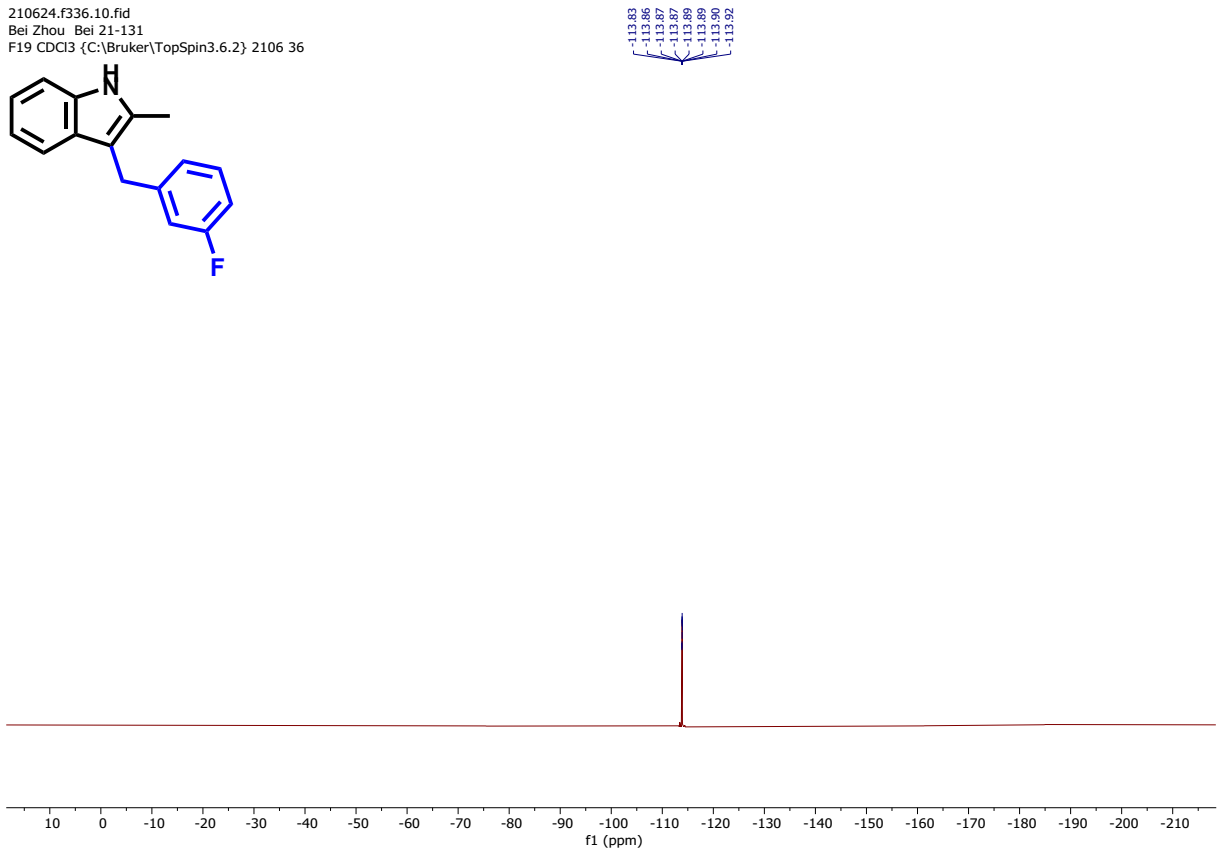

210525.432.10.fid  
Zhou/ Bei 21-114  
Au1H CDCl3 {C:\Bruker\TopSpin3.5pl6} 2105 32

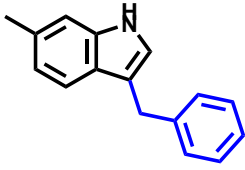

7.26 CDCl3

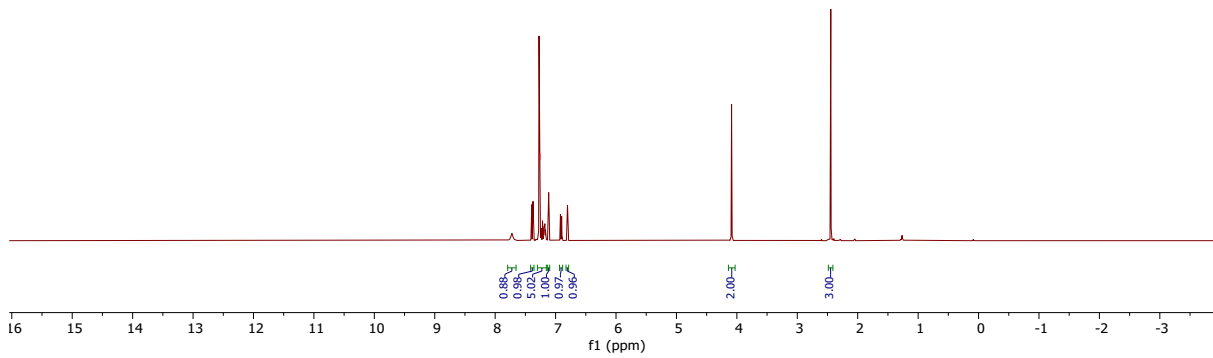

210525.432.11.fid  
Zhou/ Bei 21-114  
Au13C CDCl3 {C:\Bruker\TopSpin3.5pl6} 2105 32

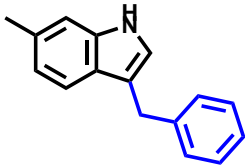

141.38  
138.96  
134.97  
128.35  
125.87  
125.40  
121.75  
121.16  
118.87  
115.64  
111.09

77.41 CDCl3  
77.09 CDCl3  
76.78 CDCl3

31.69

21.76

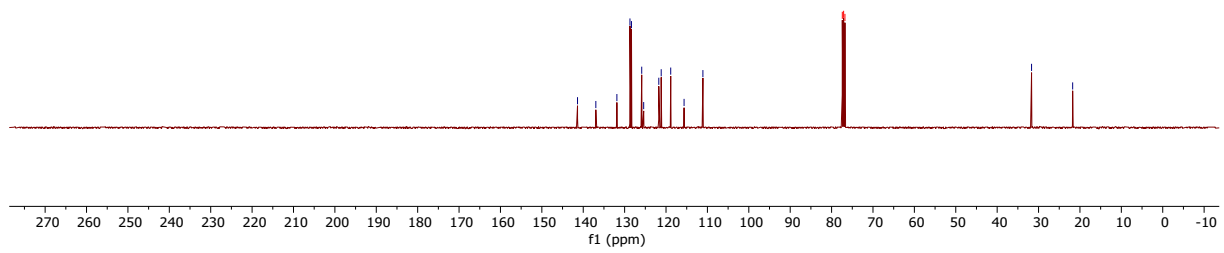

210906.304.10.fid  
Bei Zhou Bei 21-134  
Au1H CDCl3 {C:\Bruker\TopSpin3.6.2} 2109 4

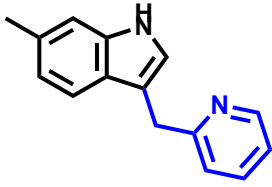

— 7.26 CDCl3

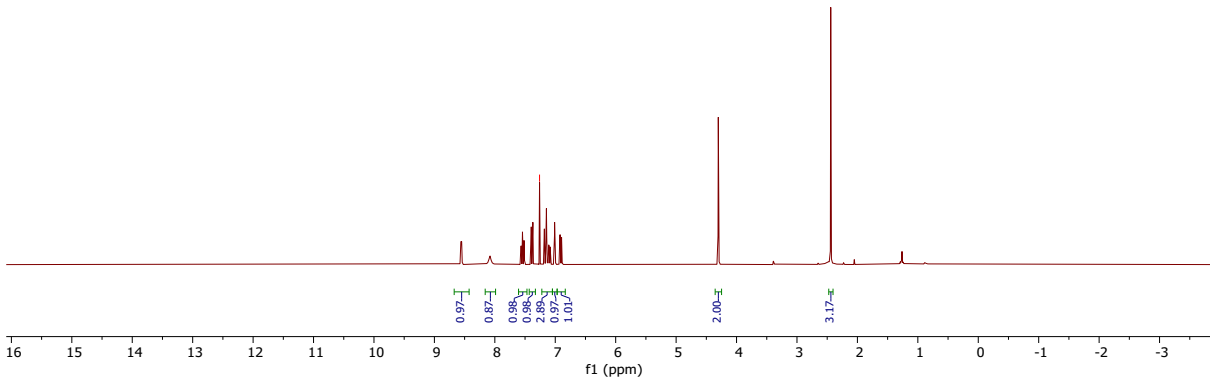

210906.304.11.fid  
Bei Zhou Bei 21-134  
Au13C CDCl3 {C:\Bruker\TopSpin3.6.2} 2109 4

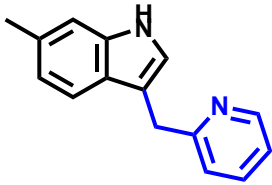

— 161.27

— 148.79

— 136.95

— 136.74

— 131.91

— 122.88

— 122.12

— 121.22

— 121.14

— 118.62

— 113.52

— 111.13

— 77.17 CDCl3

— 77.05 CDCl3

— 76.62 CDCl3

— 34.44

— 21.70

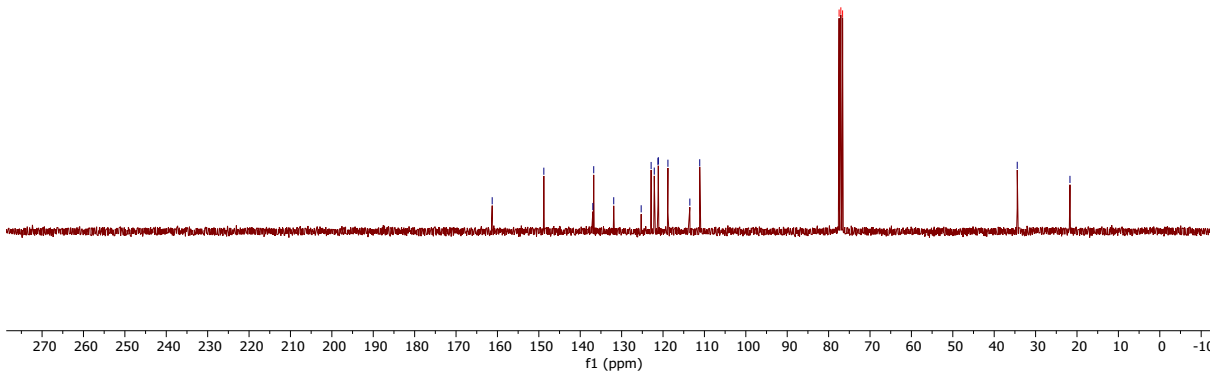

211015.306.10.fid  
Bei Zhou 21-127  
Au1H CDCl3 {C:\Bruker\TopSpin3.6.2} 2110 6

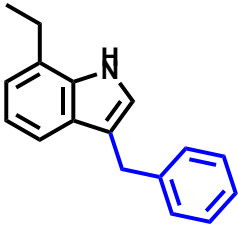

7.26 CDCl3

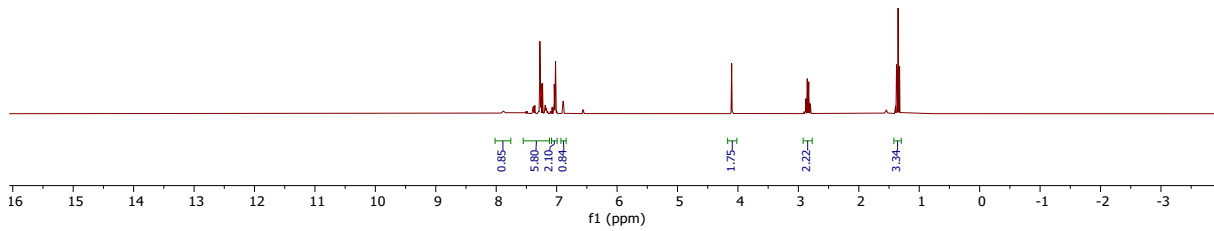

211015.306.11.fid  
Bei Zhou 21-127  
Au13C CDCl3 {C:\Bruker\TopSpin3.6.2} 2110 6

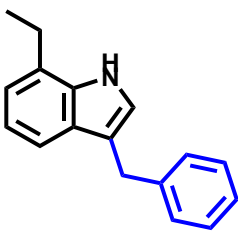

141.30  
138.31  
128.73  
128.33  
127.23  
126.86  
126.86  
121.94  
120.60  
119.69  
116.94  
116.35

77.47 CDCl3  
77.06 CDCl3  
76.63 CDCl3

31.74  
24.02  
13.83

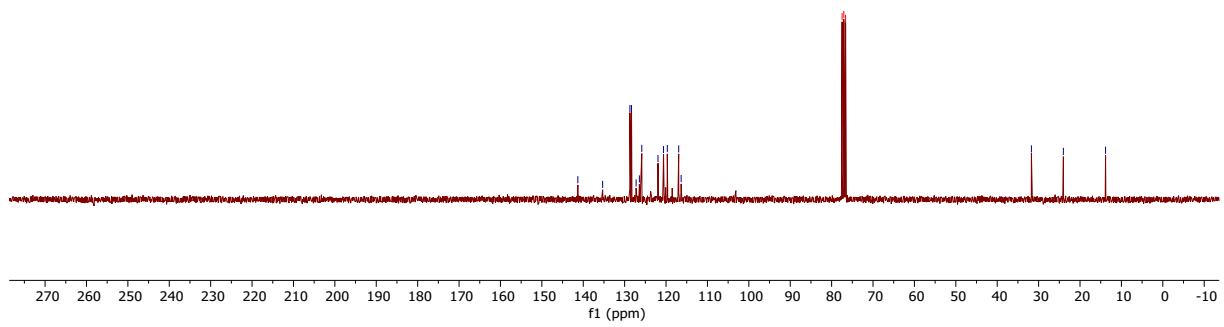

210726.309.10.fid  
Bei Zhou Bei 21-143  
Au1H CDCl3 {C:\Bruker\TopSpin3.6.2} 2107 9

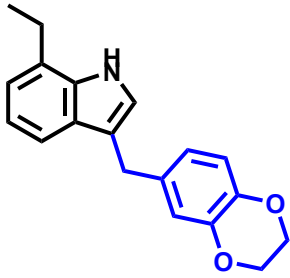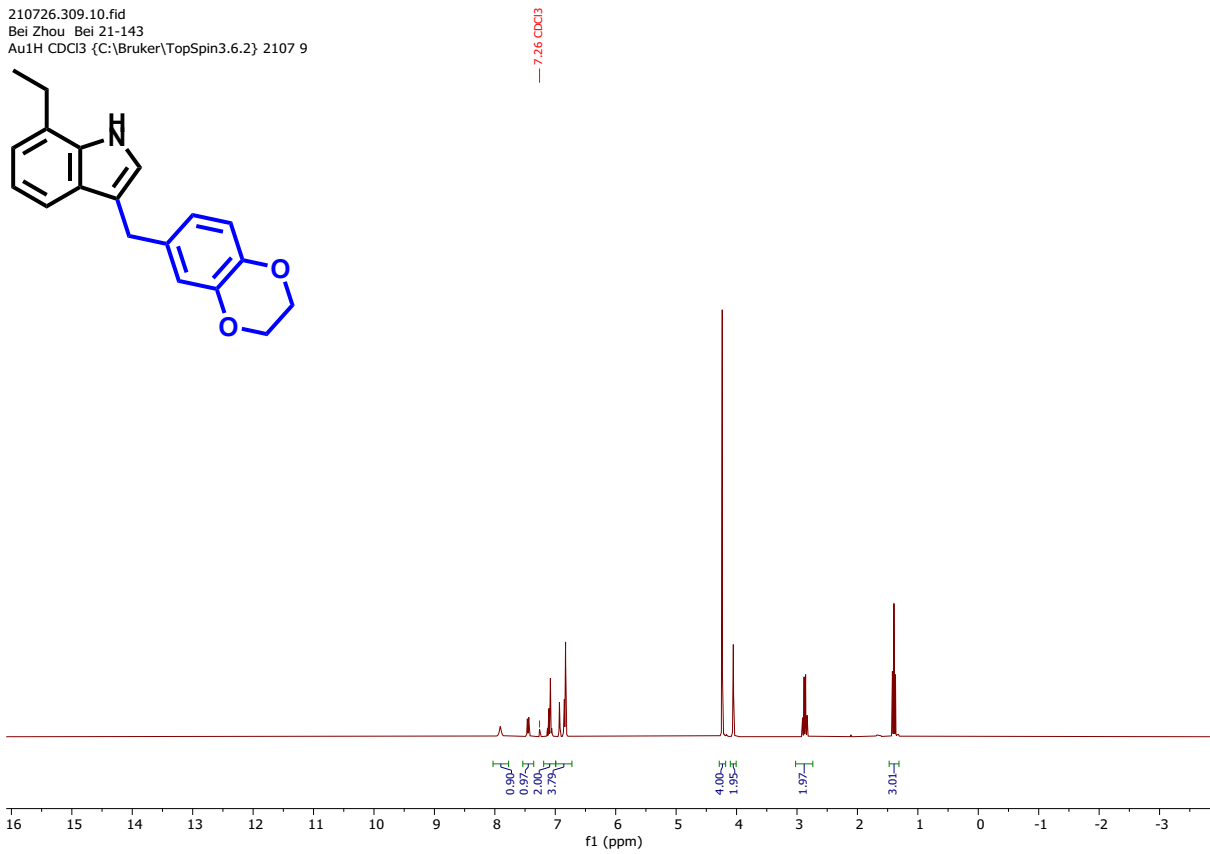

210726.309.11.fid  
Bei Zhou Bei 21-143  
Au13C CDCl3 {C:\Bruker\TopSpin3.6.2} 2107 9

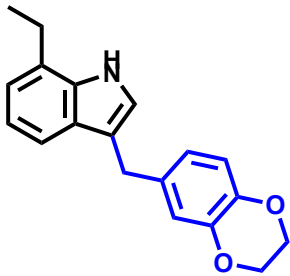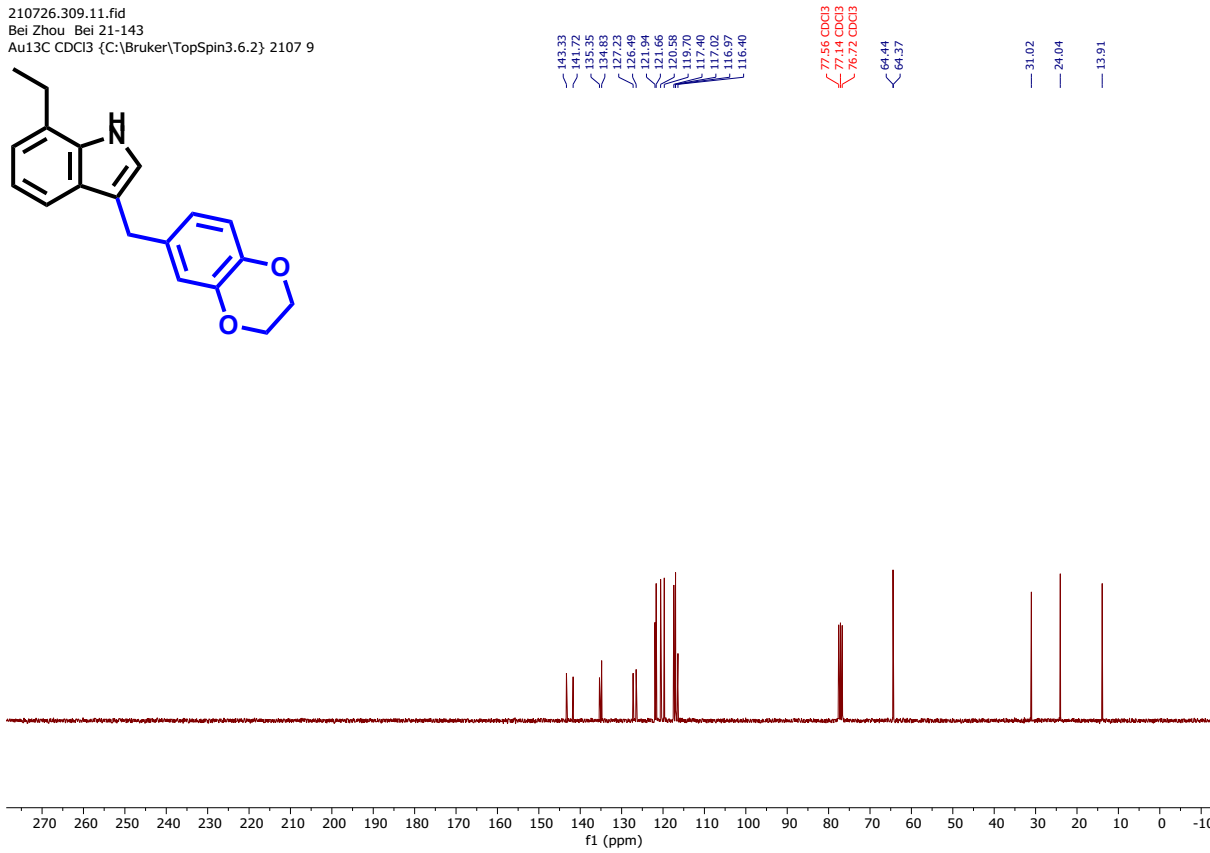

210729.f344.10.fid  
Bei Zhou Bei 21-136  
PROTON CDCl3 {C:\Bruker\TopSpin3.6.2} 2107 44

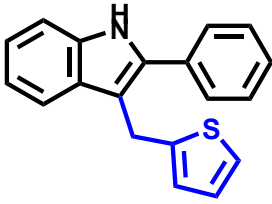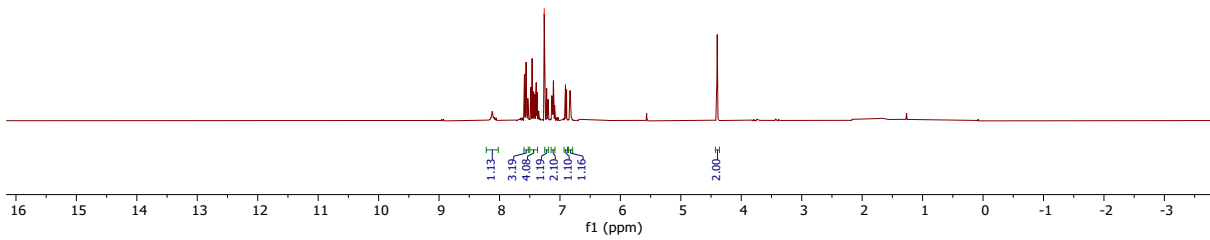

210729.f344.11.fid  
Bei Zhou Bei 21-136  
C13CPD CDCl3 {C:\Bruker\TopSpin3.6.2} 2107 44

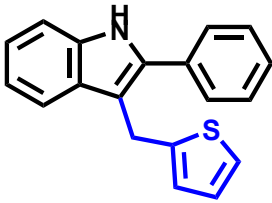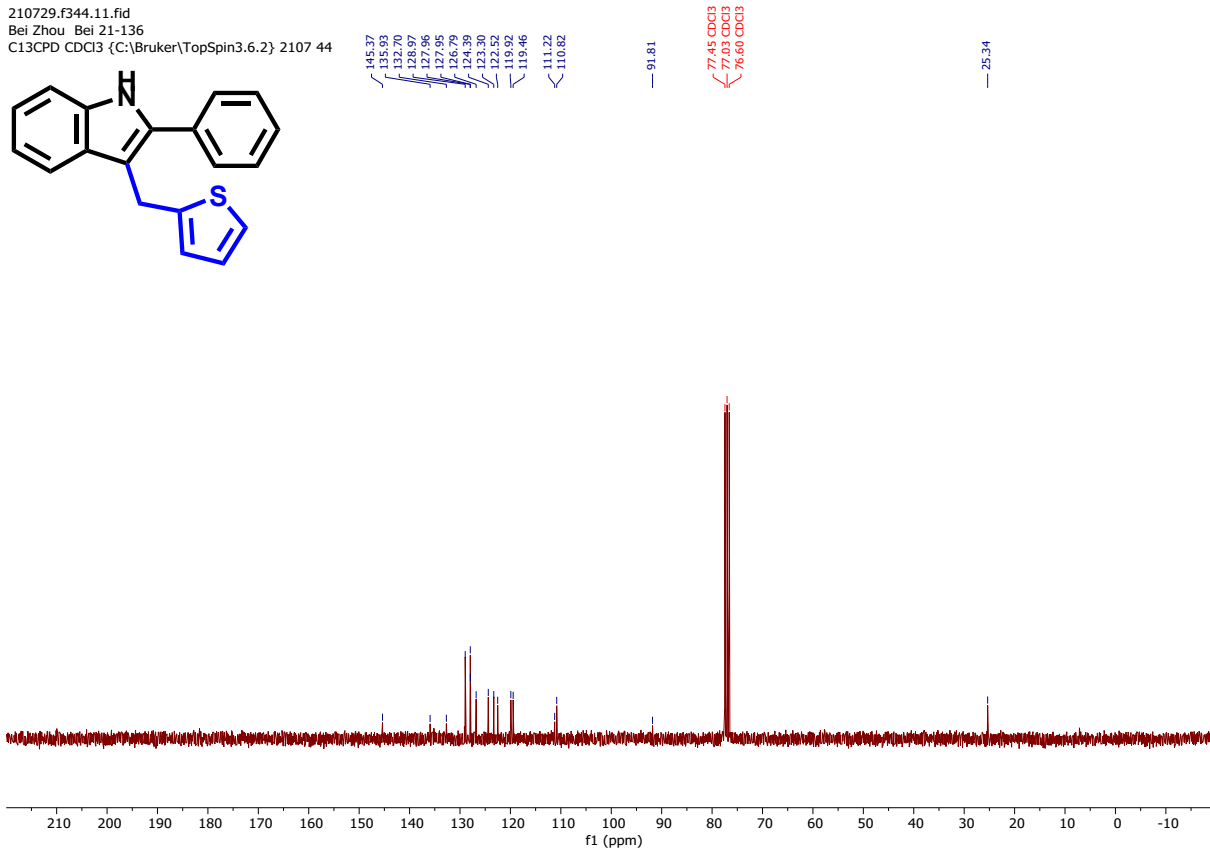



210519.459.10.fid  
Zhou/ Bei-21-110  
Au1H CDCl3 {C:\Bruker\TopSpin3.5pl6} 2105 59

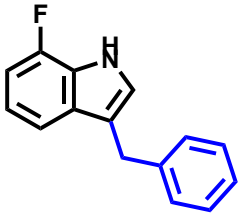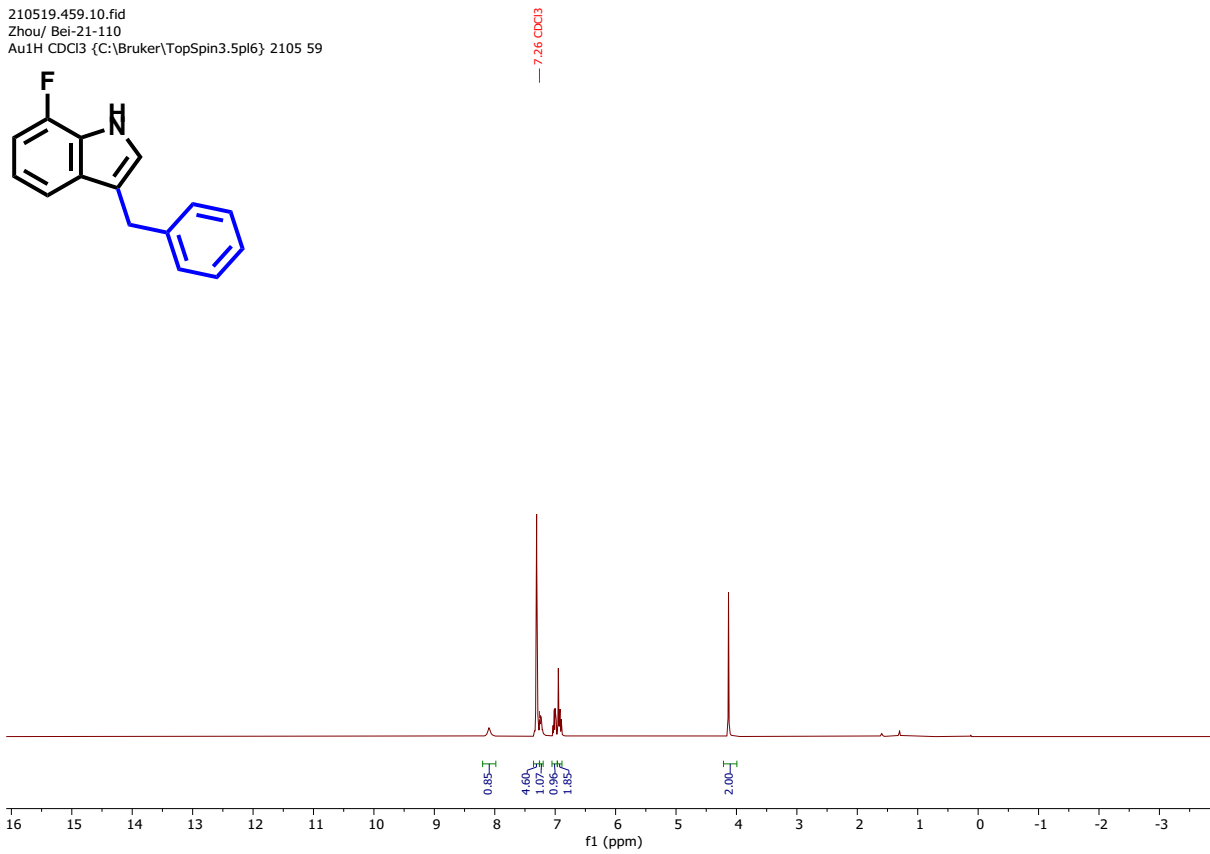

210519.459.11.fid  
Zhou/ Bei-21-110  
Au13C CDCl3 {C:\Bruker\TopSpin3.5pl6} 2105 59

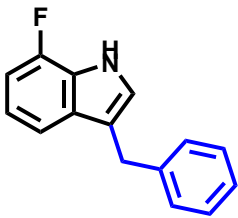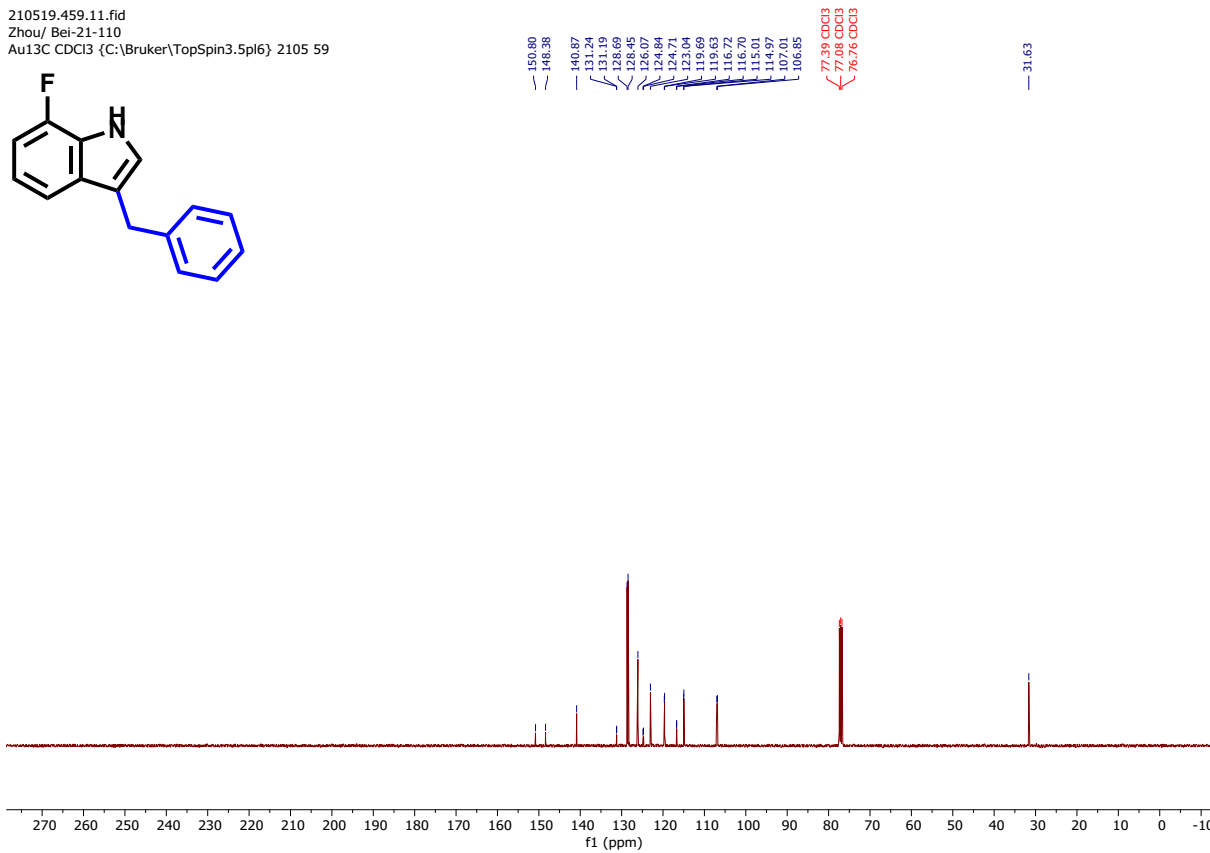

210525.426.10.fid  
Zhou/ Bei 21-110  
F19 CDCl3 {C:\Bruker\TopSpin3.5pl6} 2105 26

135.45  
135.46  
135.48  
135.49  
135.50

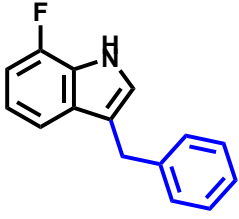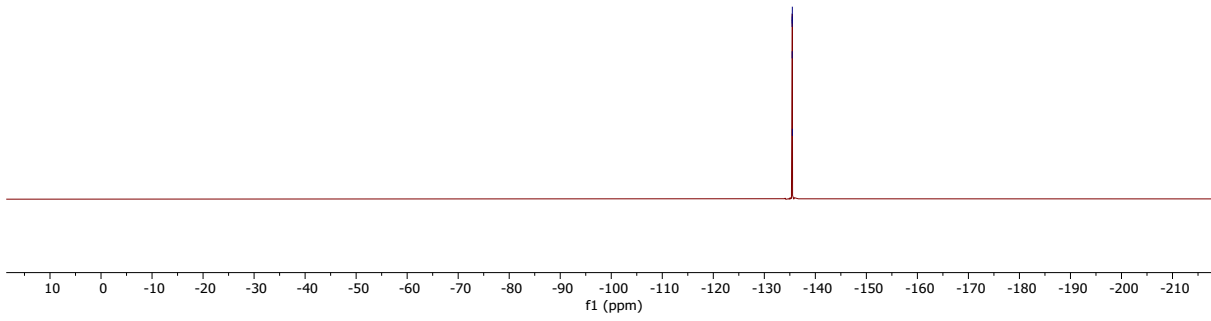

210830.318.10.fid  
Bei Zhou 21-124  
Au1H CDCl3 {C:\Bruker\TopSpin3.6.2} 2108 18

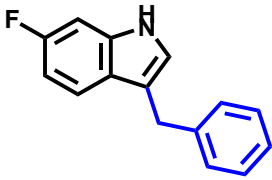

7.36 CDCl3

1.55 H2O

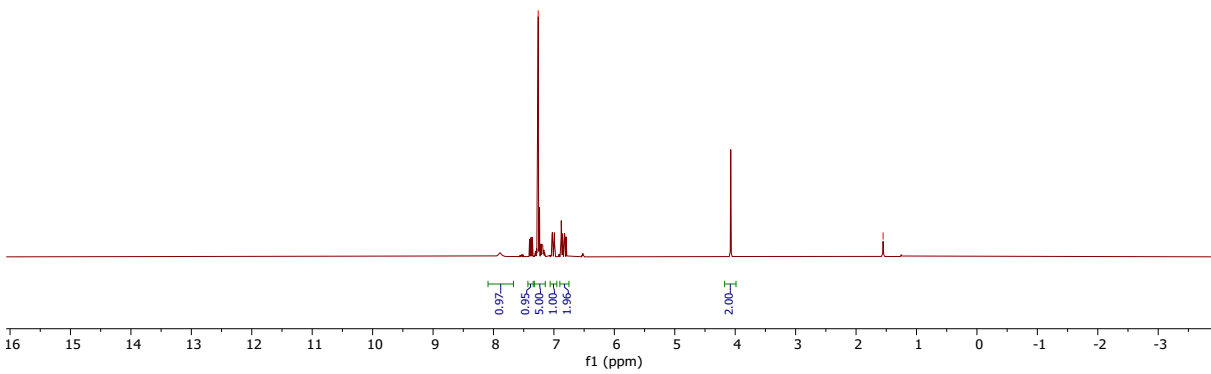

210830.318.11.fid  
Bei Zhou 21-124  
Au13C CDCl3 {C:\Bruker\TopSpin3.6.2} 2108 18

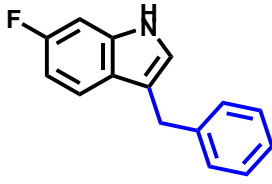

161.63  
158.49  
140.92  
136.29  
128.65  
128.40  
126.02  
124.08  
122.84  
122.54  
119.97  
119.83  
115.96  
108.30  
107.96  
97.55  
97.21  
77.47 CDCl3  
77.00 CDCl3  
76.63 CDCl3  
31.59

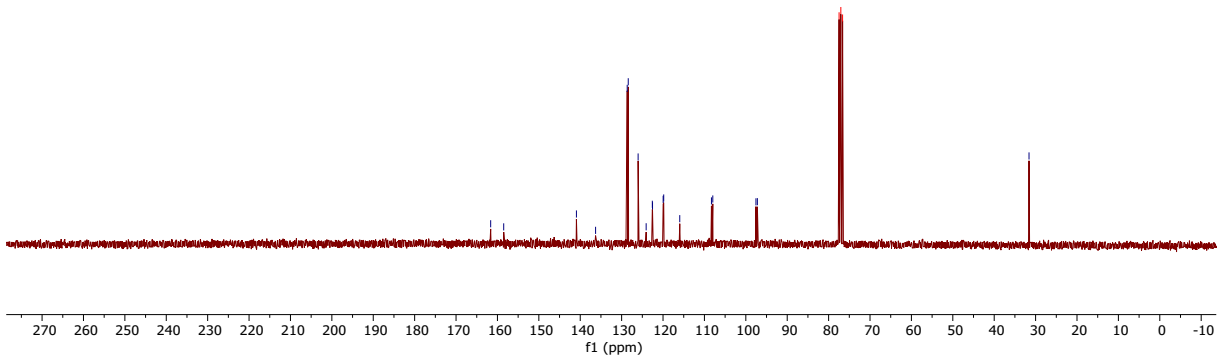

210831.f319.10.fid  
Bei Zhou 21-124  
F19 CDCl3 {C:\Bruker\TopSpin3.6.2} 2108 19

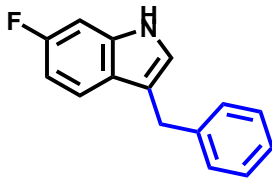

121.26  
121.28  
121.30  
121.32  
121.33  
121.35  
121.37  
121.38

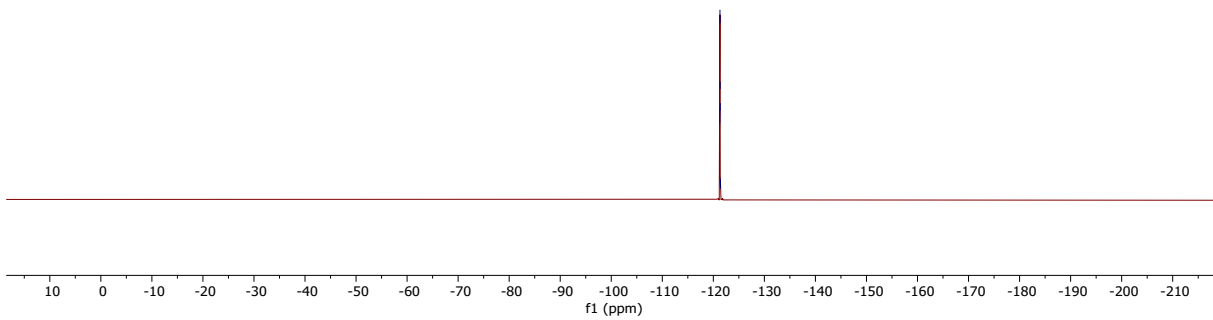

210804.320.10.fid  
Bei Zhou Bei 21-141-1  
Au1H DMSO {C:\Bruker\TopSpin3.6.2} 2108 20

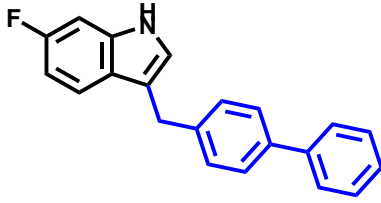

3.36 H2O  
2.52 DMSO  
2.51 DMSO  
2.49 DMSO  
2.50 DMSO

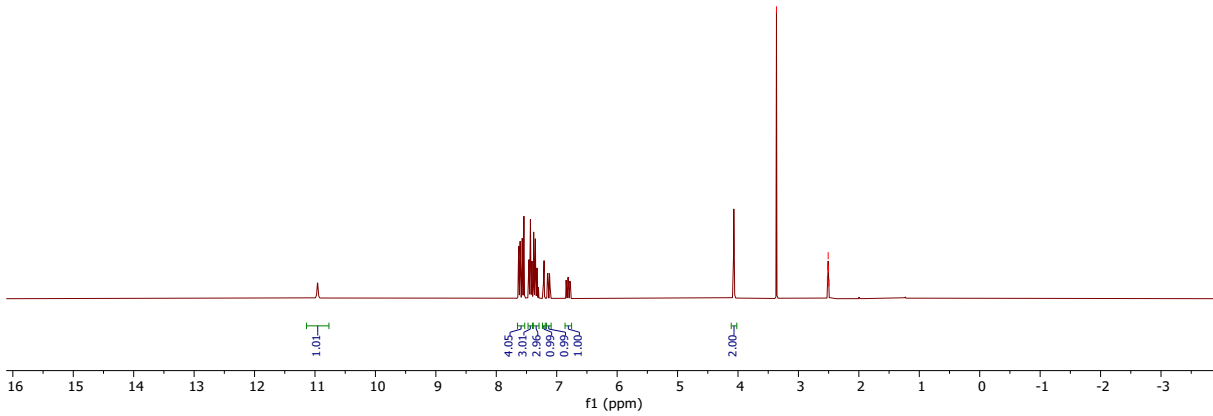

210804.320.11.fid  
Bei Zhou Bei 21-141-1  
Au13C DMSO {C:\Bruker\TopSpin3.6.2} 2108 20

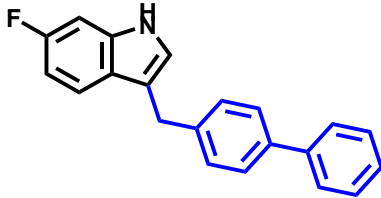

169.97  
157.78  
141.39  
140.56  
138.11  
136.60  
136.63  
129.43  
129.33  
127.60  
127.01  
126.95  
124.33  
124.33  
124.23  
120.05  
119.91  
114.44  
107.41  
97.99  
97.65

40.82 DMSO  
40.54 DMSO  
40.26 DMSO  
39.88 DMSO  
39.71 DMSO  
39.43 DMSO  
39.15 DMSO  
31.00

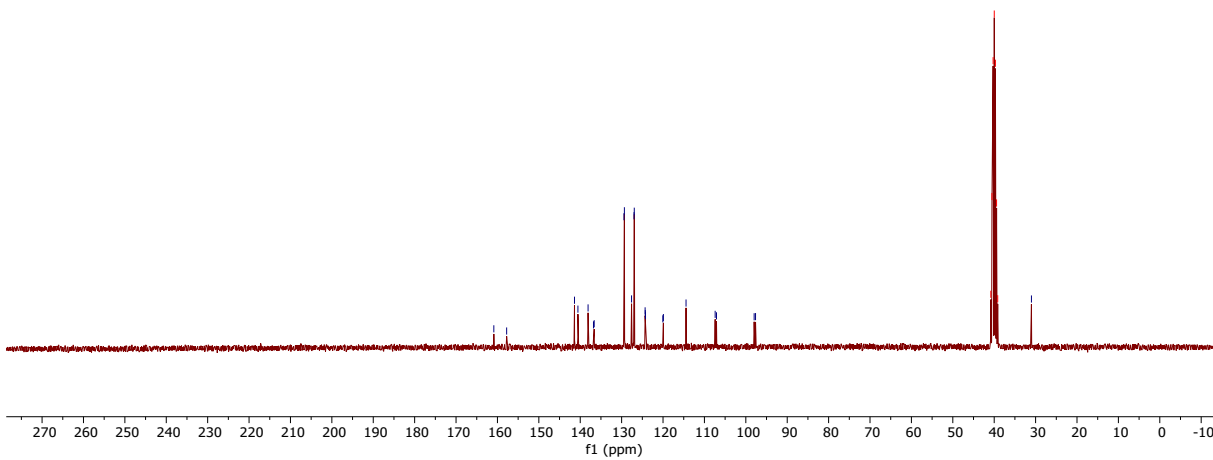

210830.317.10.fid  
Bei Zhou 21-123  
Au1H CDCl3 {C:\Bruker\TopSpin3.6.2} 2108 17

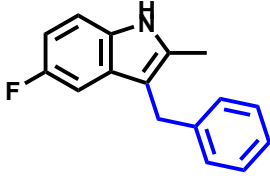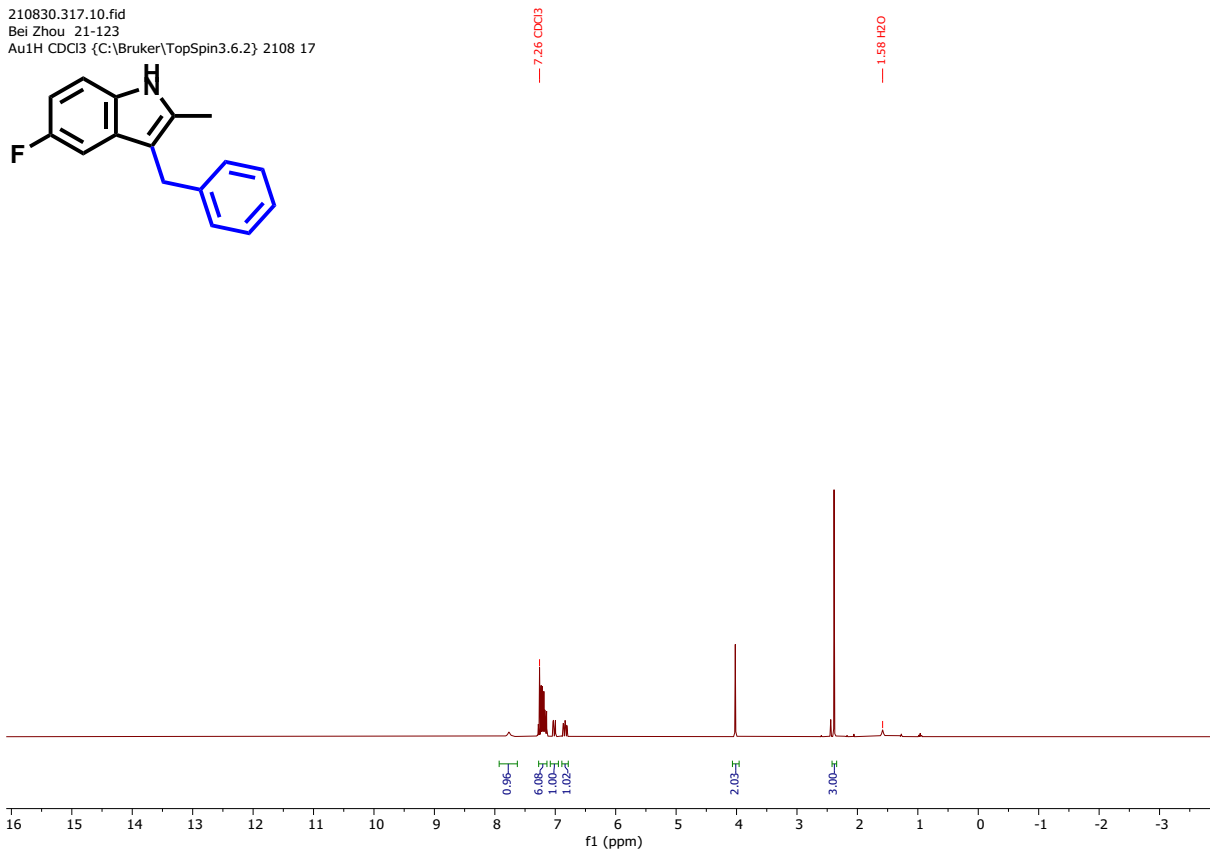

210830.317.11.fid  
Bei Zhou 21-123  
Au13C CDCl3 {C:\Bruker\TopSpin3.6.2} 2108 17

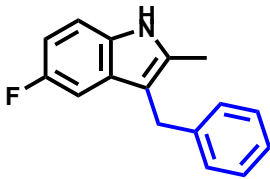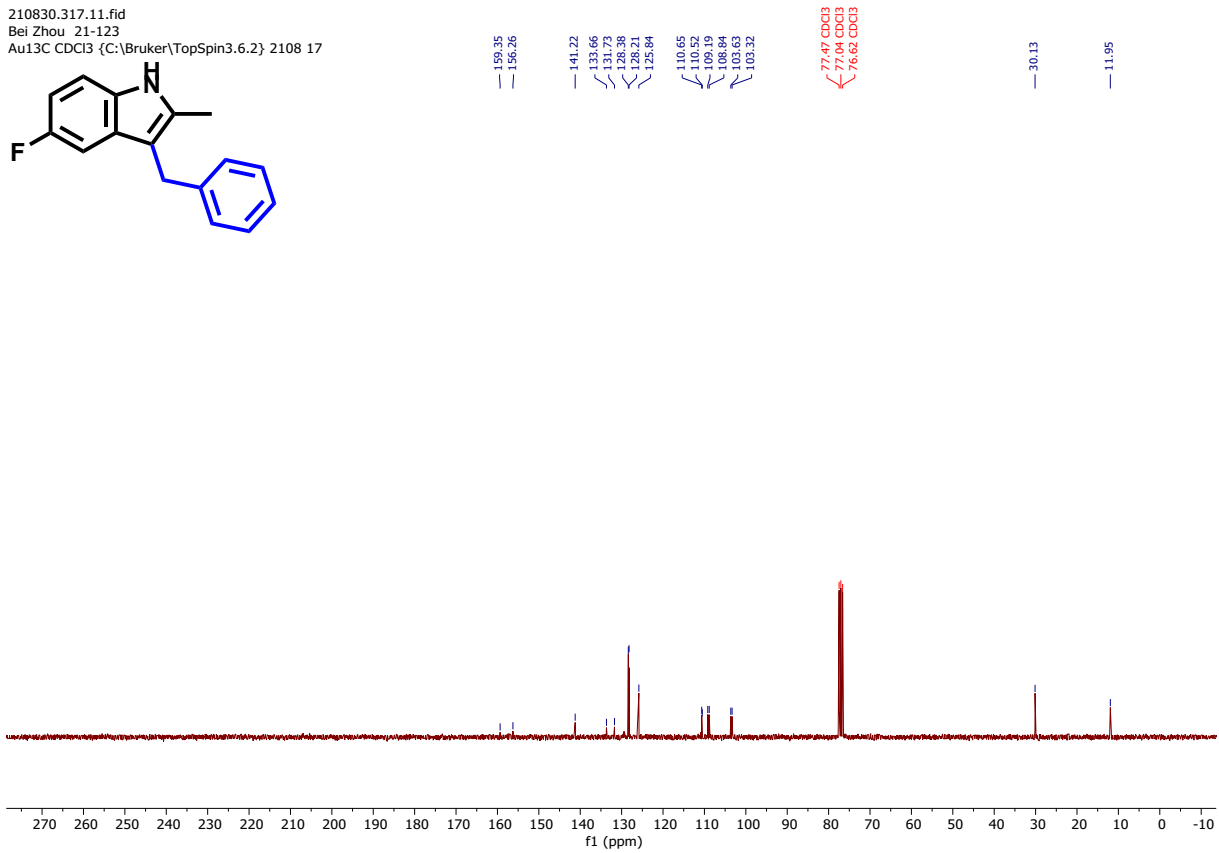

210831.f318.10.fid  
Bei Zhou 21-123  
F19 CDCl3 {C:\Bruker\TopSpin3.6.2} 2108 18

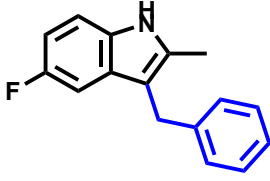

124.98  
125.00  
125.02  
125.04  
125.05  
125.07

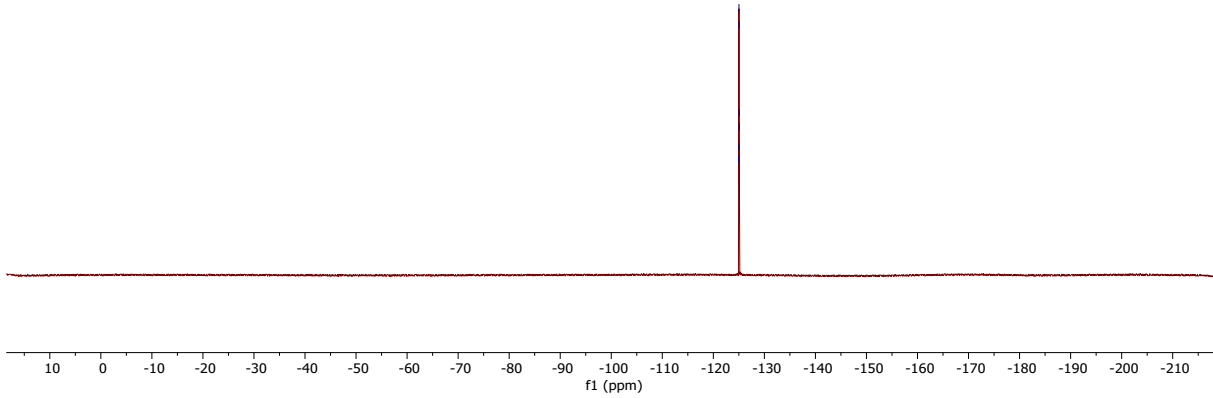

210610.418.10.fid  
Bei Zhou Bei 21-130  
Au1H CDCl3 {C:\Bruker\TopSpin3.5pl6} 2106 18

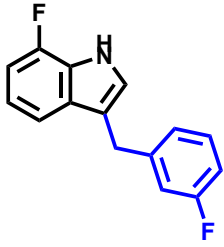

7.26 CDCl3

1.60 H2O

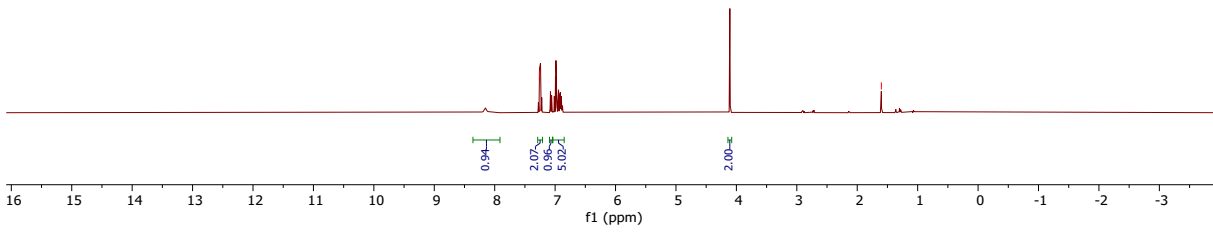

210610.418.11.fid  
Bei Zhou Bei 21-130  
Au13C CDCl3 {C:\Bruker\TopSpin3.5pl6} 2106 18

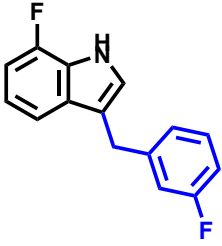

164.24  
161.80  
150.80  
148.38  
143.55  
139.66  
131.05  
131.00  
129.82  
129.74  
124.86  
124.72  
124.26  
123.74  
123.11  
119.82  
119.76  
115.85  
115.83  
115.60  
115.39  
114.84  
113.06  
112.86  
107.13  
106.97  
77.37 CDCl3  
77.06 CDCl3  
76.74 CDCl3

31.35

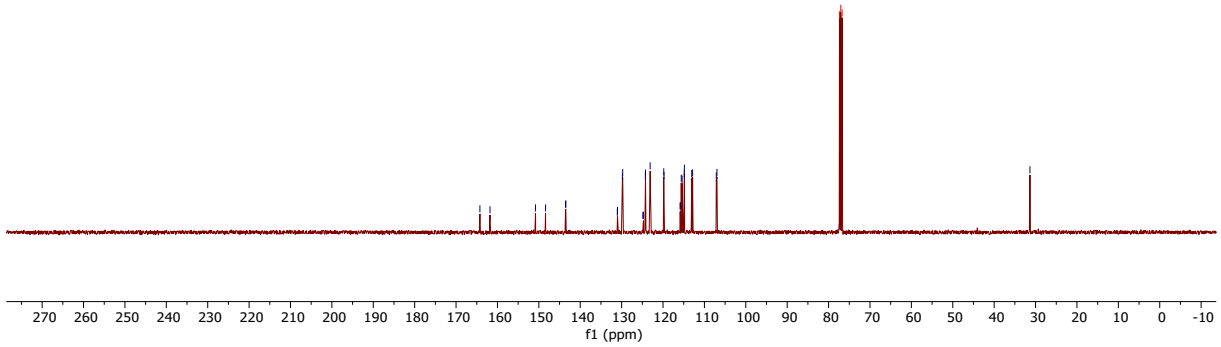

210621.428.10.fid  
Bei Zhou Bei 21-130  
F19 CDCl3 {C:\Bruker\TopSpin3.5pl6} 2106 28

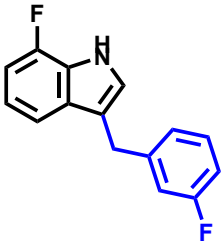

-113.61  
-113.62  
-113.64  
-113.65  
-113.67  
-113.69  
-135.38  
-135.39  
-135.41  
-135.41  
-135.42  
-135.43

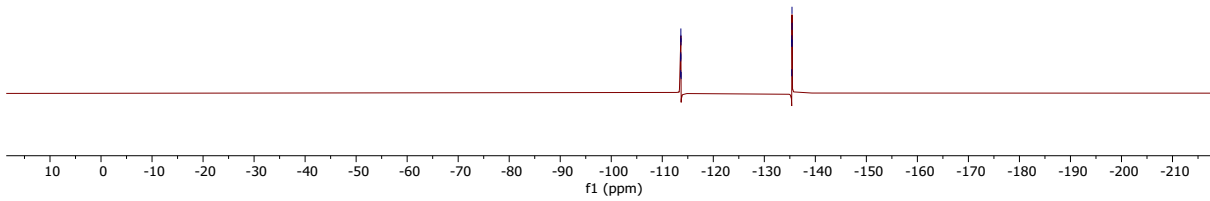





210430.436.10.fid  
Bei Zhou Bei21-101-2  
Au1H CDCl3 {C:\Bruker\TopSpin3.5pl6} 2104 36

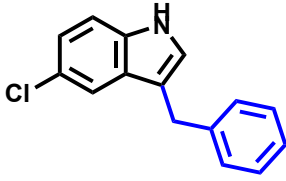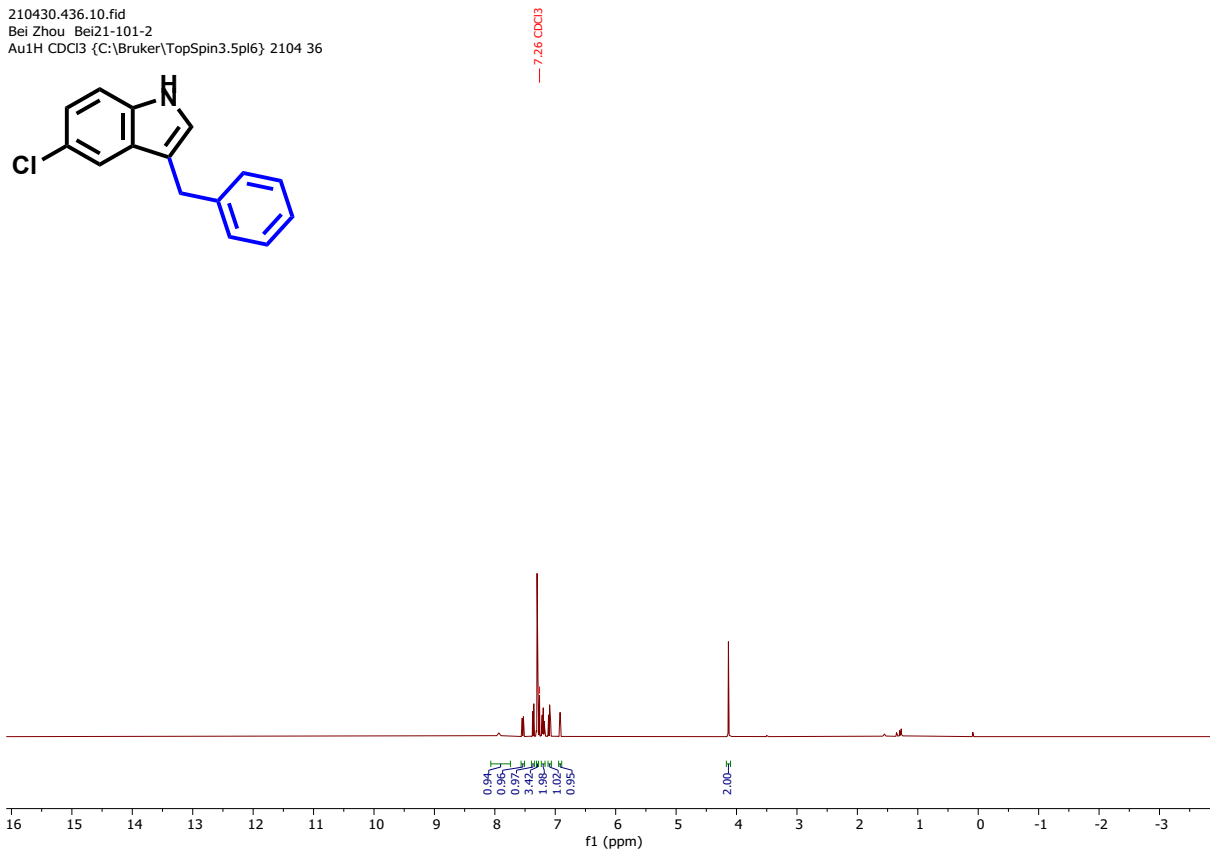

210430.436.11.fid  
Bei Zhou Bei21-101-2  
Au13C CDCl3 {C:\Bruker\TopSpin3.5pl6} 2104 36

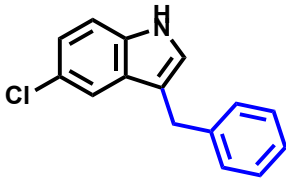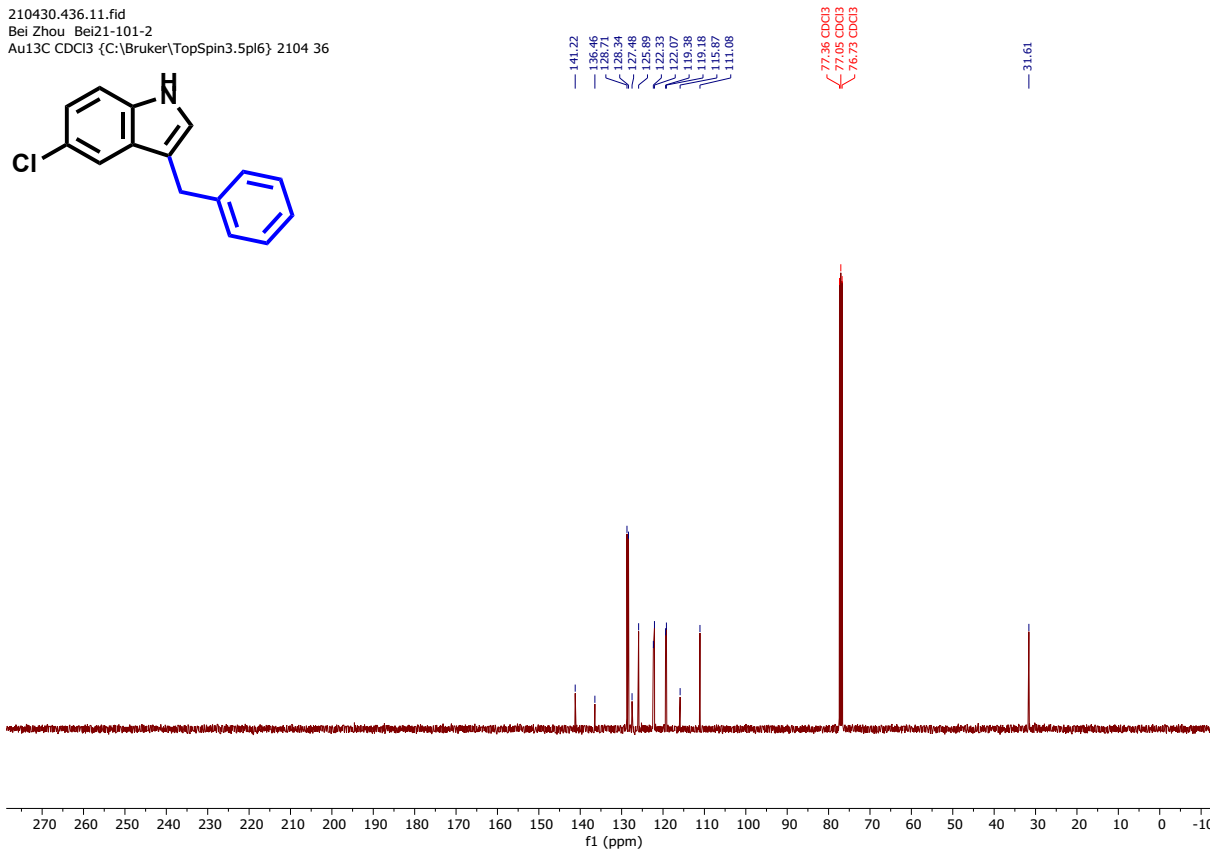

210629.f334.10.fid  
Bei Zhou Bei 21-132-2  
PROTON CDCl3 {C:\Bruker\TopSpin3.6.2} 2106 34

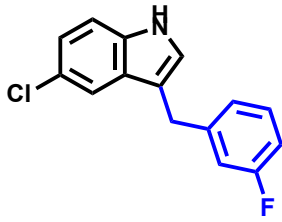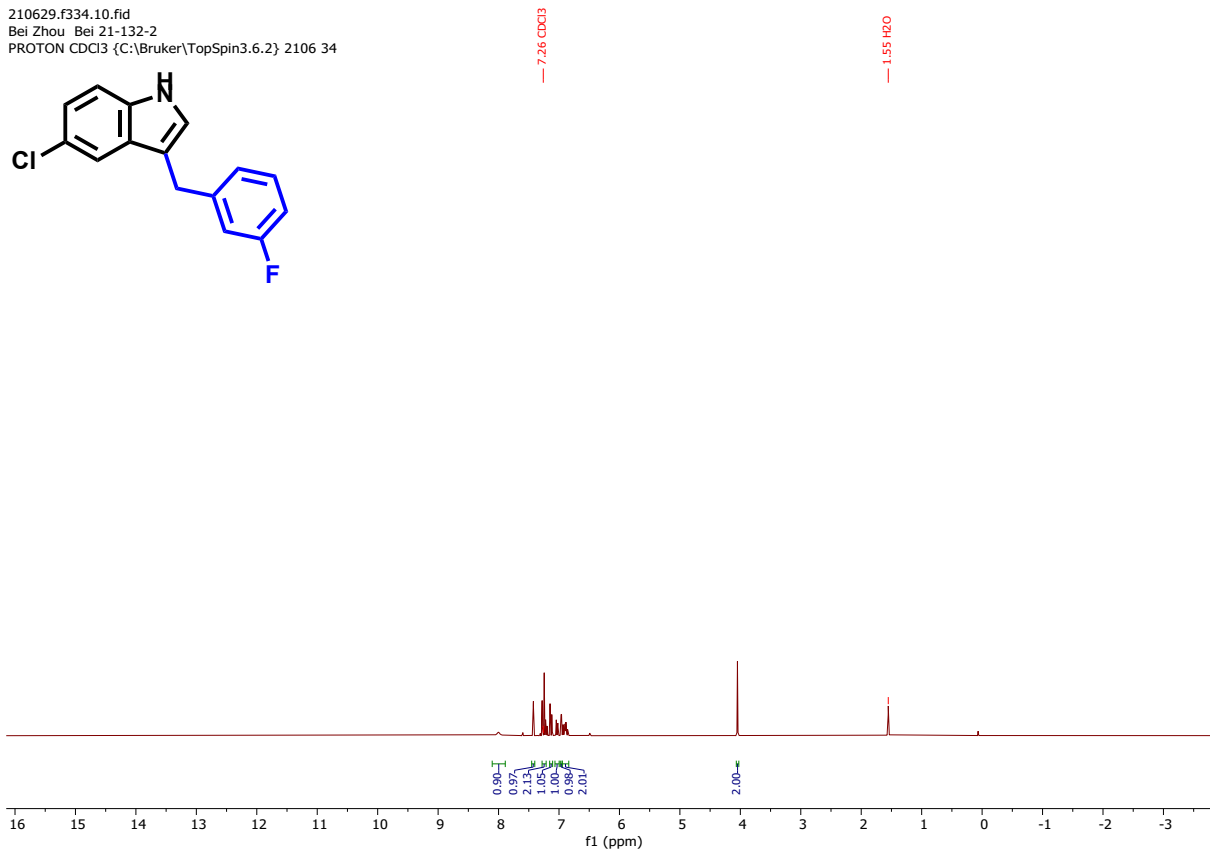

210629.f334.11.fid  
Bei Zhou Bei 21-132-2  
C13CPD CDCl3 {C:\Bruker\TopSpin3.6.2} 2106 34

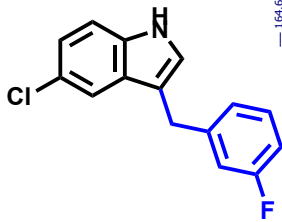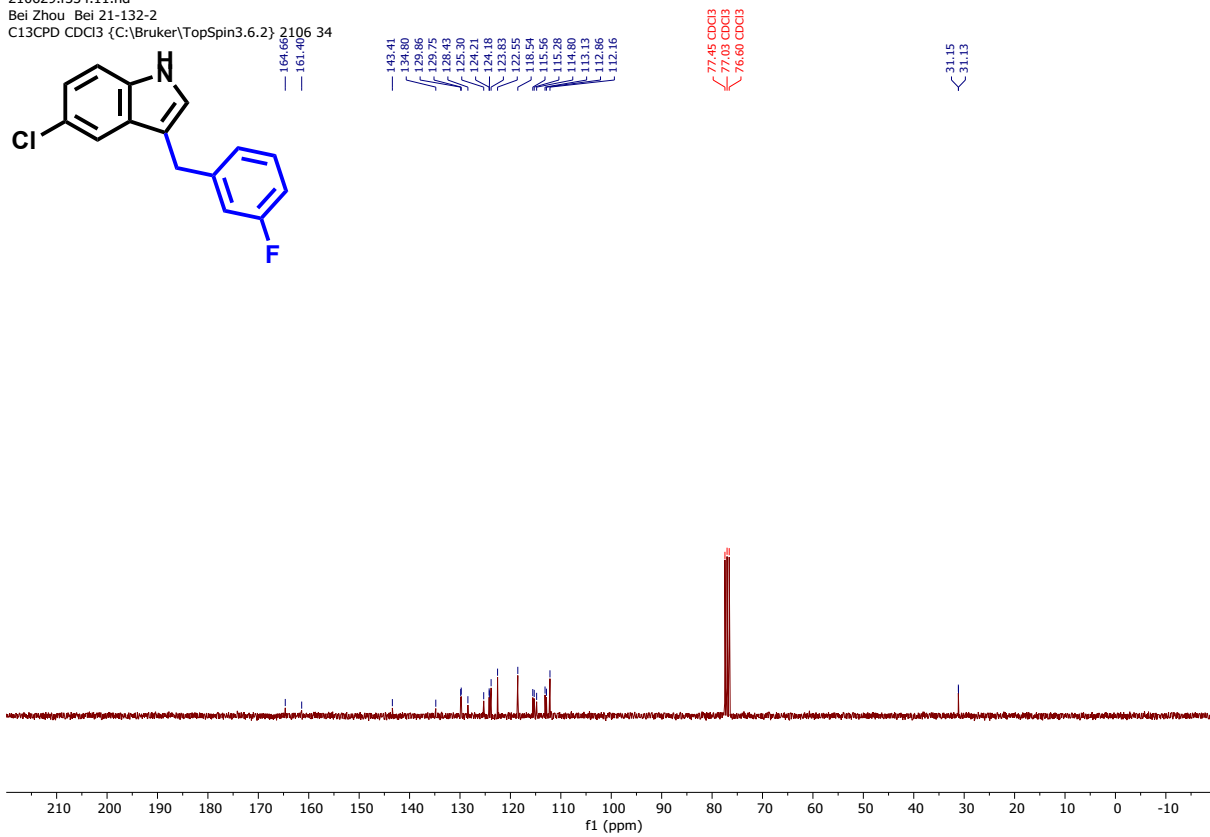

210630.f352.10.fid  
Bei Zhou Bei 21-132  
F19 CDCl3 {C:\Bruker\TopSpin3.6.2} 2106 52

-113.60  
-113.62  
-113.63  
-113.64  
-113.65  
-113.67

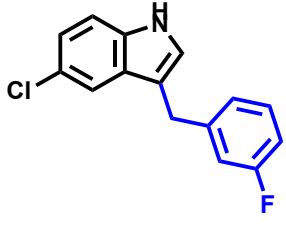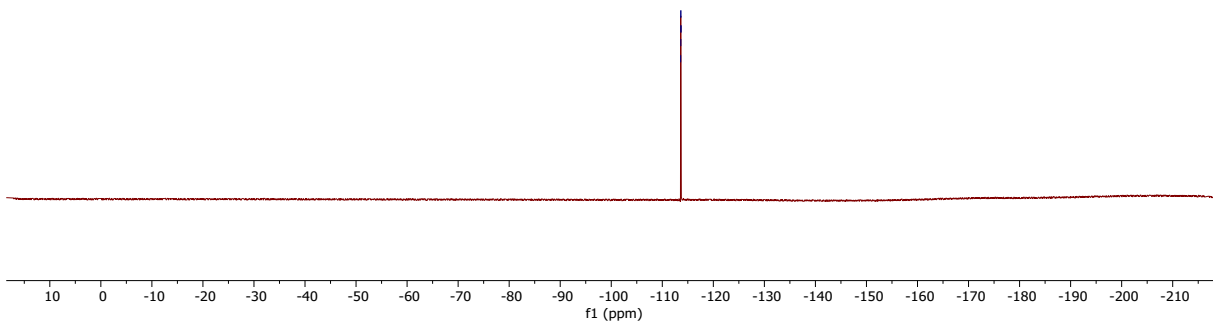

210809.f338.10.fid  
Bei Zhou Bei 21-111-1  
PROTON CDCl3 {C:\Bruker\TopSpin3.6.2} 2108 38

7.26 CDCl3

1.56 H2O

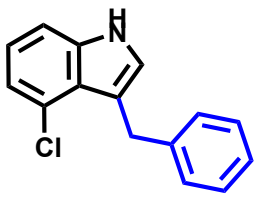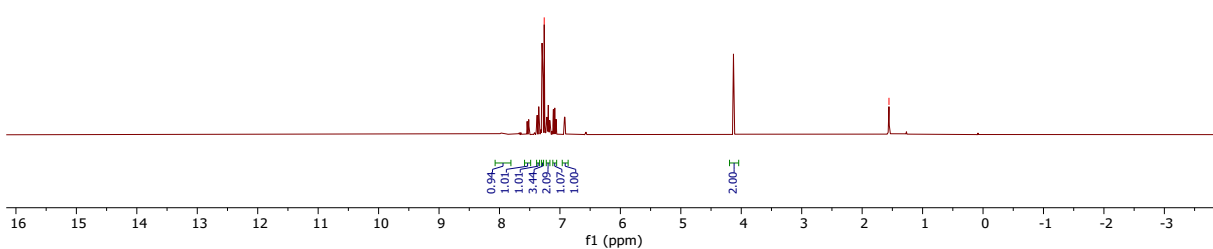

210809.f338.11.fid  
Bei Zhou Bei 21-111-1  
C13CPD CDCl3 {C:\Bruker\TopSpin3.6.2} 2108 38

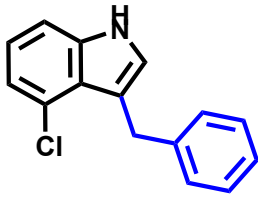

141.21  
136.47  
128.70  
128.33  
125.88  
122.32  
122.06  
119.37  
115.88  
111.06  
77.45 CDCl3  
77.03 CDCl3  
76.61 CDCl3

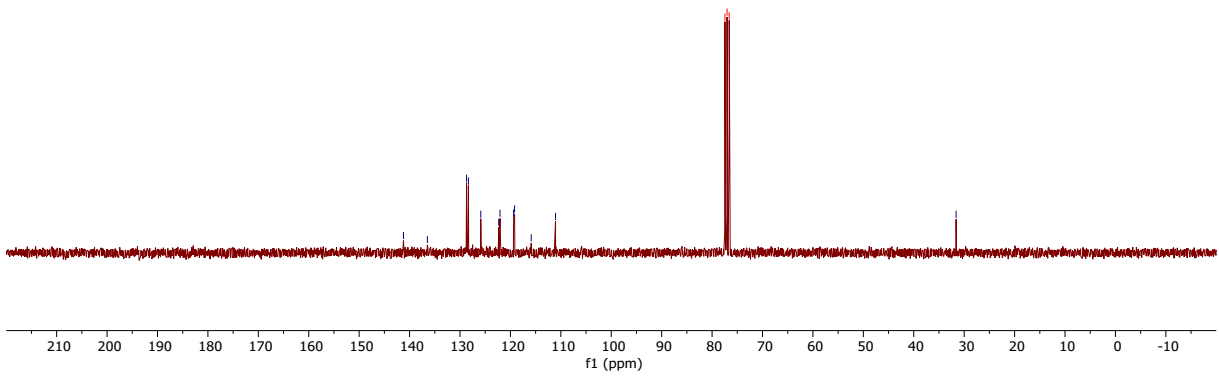

210726.303.10.fid  
Bei Zhou Bei 21-128  
Au1H CDCl3 {C:\Bruker\TopSpin3.6.2} 2107 3

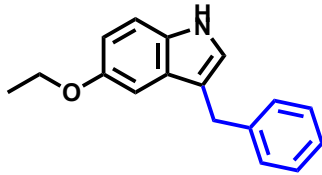

7.26 CDCl3

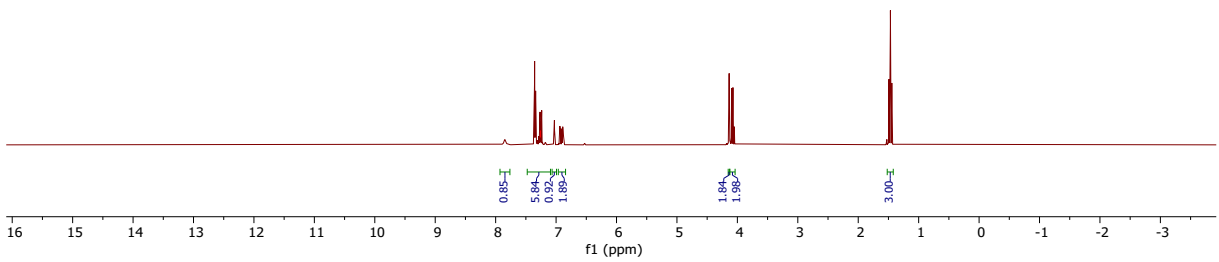

210726.303.11.fid  
Bei Zhou Bei 21-128  
Au13C CDCl3 {C:\Bruker\TopSpin3.6.2} 2107 3

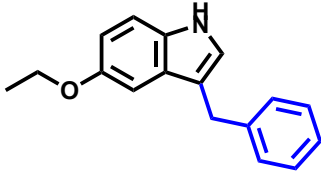

153.16  
141.26  
131.70  
128.75  
127.84  
127.95  
125.94  
123.27  
115.44  
112.73  
111.83  
102.29  
77.56 CDCl3  
77.26 CDCl3  
76.71 CDCl3  
64.28  
31.67  
15.11

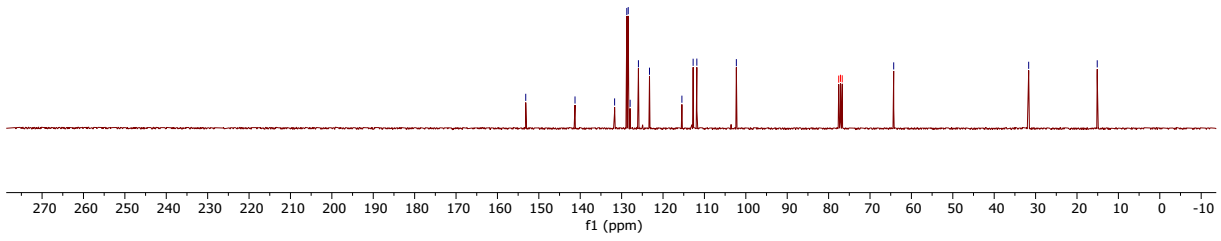

210726.307.10.fid  
Bei Zhou Bei 21-144  
Au1H CDCl3 {C:\Bruker\TopSpin3.6.2} 2107 7

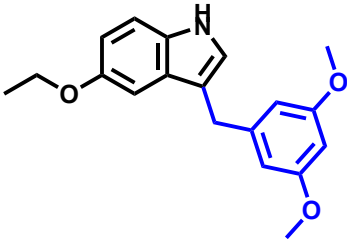

7.26 CDCl3

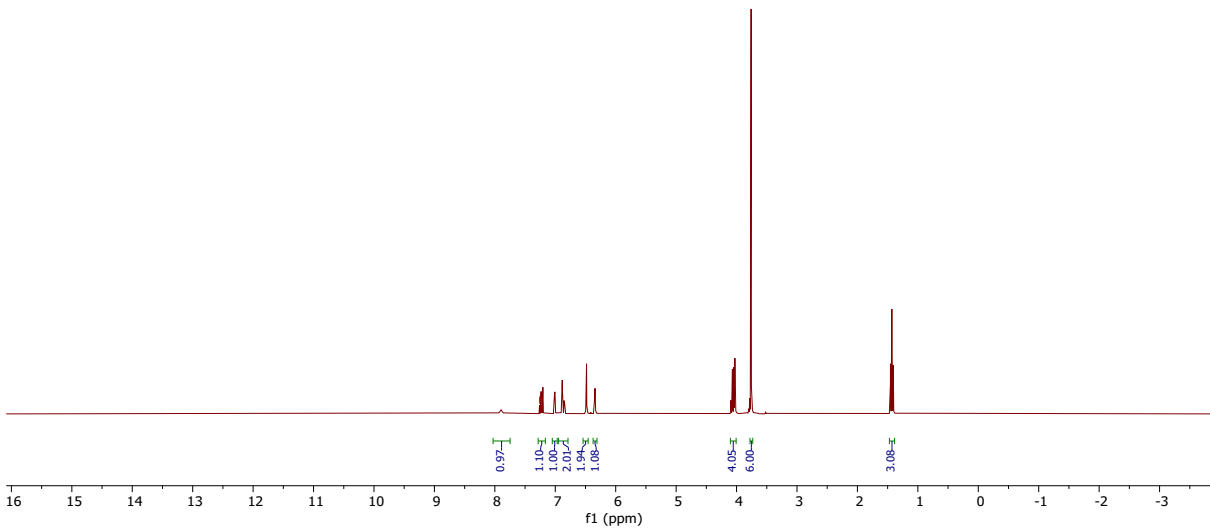

210726.307.11.fid  
Bei Zhou Bei 21-144  
Au13C CDCl3 {C:\Bruker\TopSpin3.6.2} 2107 7

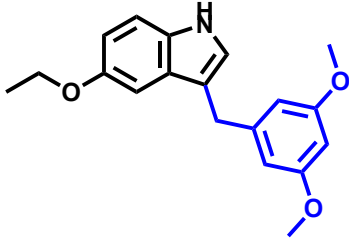

160.78  
153.16  
143.72  
131.65  
127.82  
123.25  
115.02  
112.71  
111.76  
106.91  
102.39  
97.88  
77.53 CDCl3  
77.26 CDCl3  
76.67 CDCl3  
64.26  
55.28  
31.90  
15.08

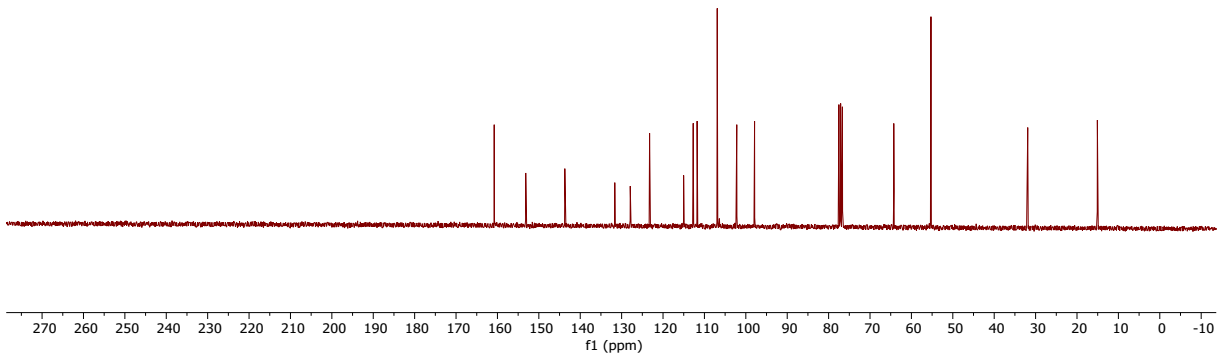

210811.404.10.fid  
Bei Zhou Bei 21-116-1  
Au1H CDCl3 {C:\Bruker\TopSpin3.5pl6} 2108 4

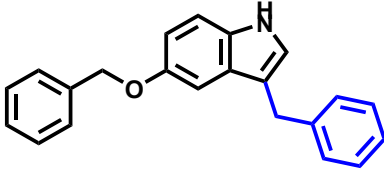

7.26 CDCl3

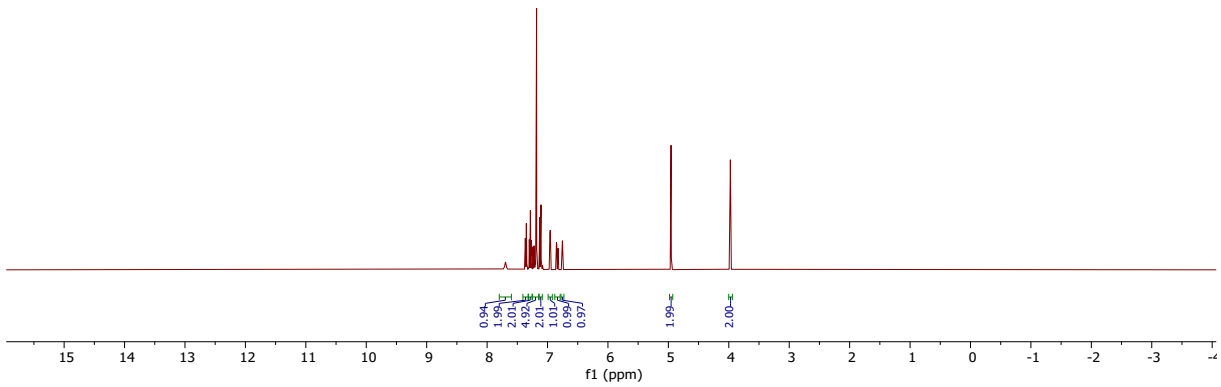

210811.404.11.fid  
Bei Zhou Bei 21-116-1  
Au13C CDCl3 {C:\Bruker\TopSpin3.5pl6} 2108 4

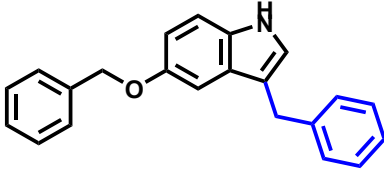

153.14  
141.30  
137.72  
131.83  
128.73  
128.56  
128.41  
127.89  
127.75  
127.91  
125.94  
123.30  
115.56  
112.91  
111.84  
102.78

77.43 CDCl3  
77.11 CDCl3  
76.99 CDCl3  
7.100

31.67

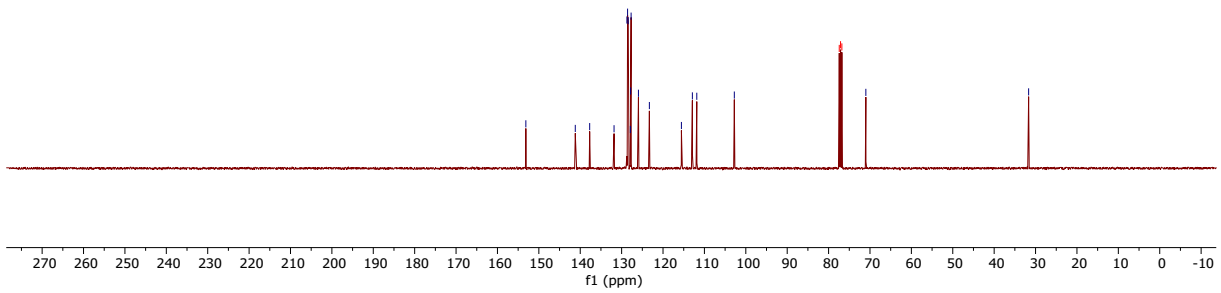

210621.436.10.fid  
Bei Zhou Bei 21-137-2  
Au1H CDCl3 {C:\Bruker\TopSpin3.5pl6} 2106 36

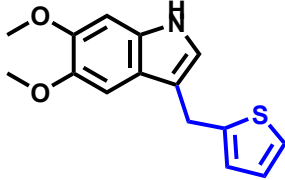

7.26 CDCl3

3.89  
3.88

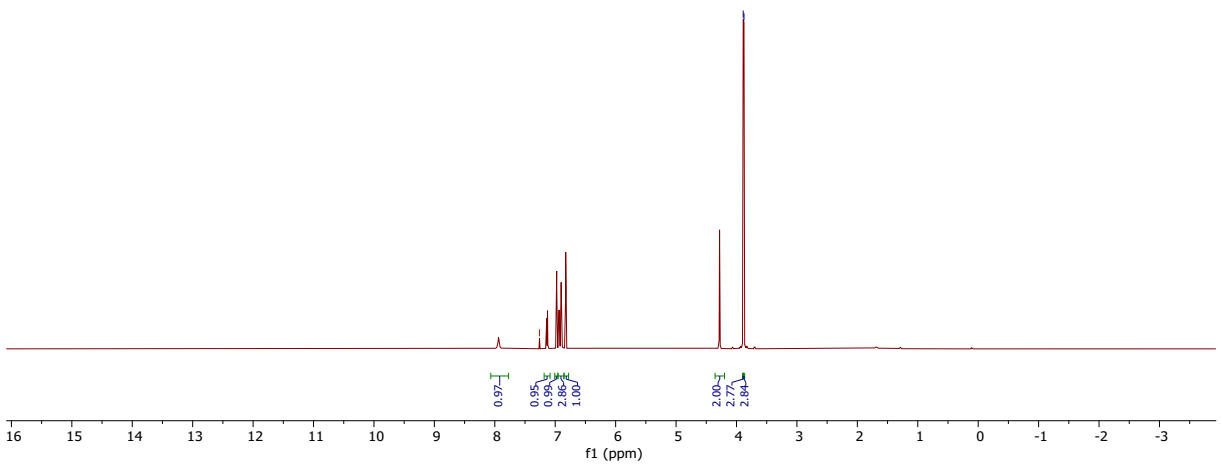

210621.436.11.fid  
Bei Zhou Bei 21-137-2  
Au13C CDCl3 {C:\Bruker\TopSpin3.5pl6} 2106 36

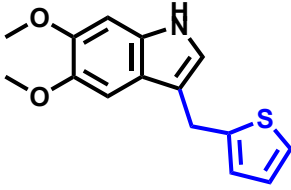

147.13  
146.85  
144.83  
130.69  
126.73  
124.66  
123.62  
120.81  
119.93  
114.97  
100.83  
94.70  
77.41 CDCl3  
77.14 CDCl3  
76.81 CDCl3

56.39  
56.18

26.11

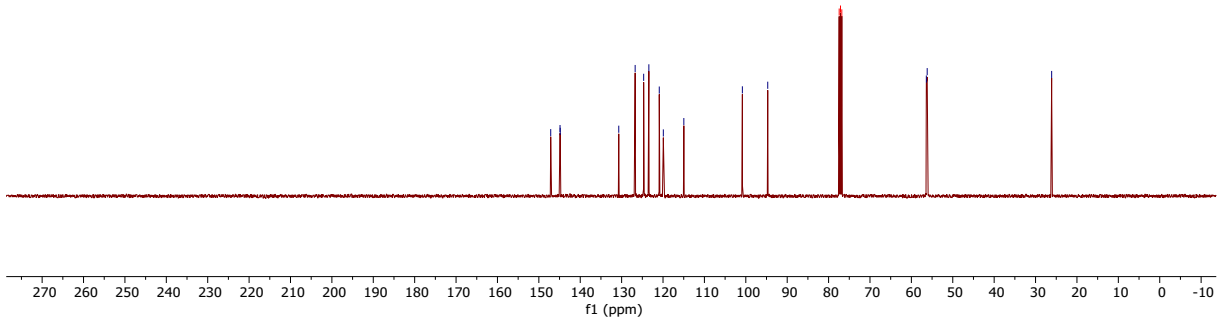

210804.330.10.fid  
Bei Zhou Bei 21-118  
Au1H CDCl3 {C:\Bruker\TopSpin3.6.2} 2108 30

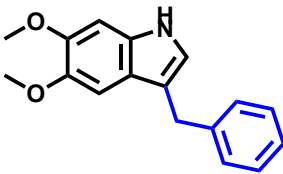

7.26 CDCl3

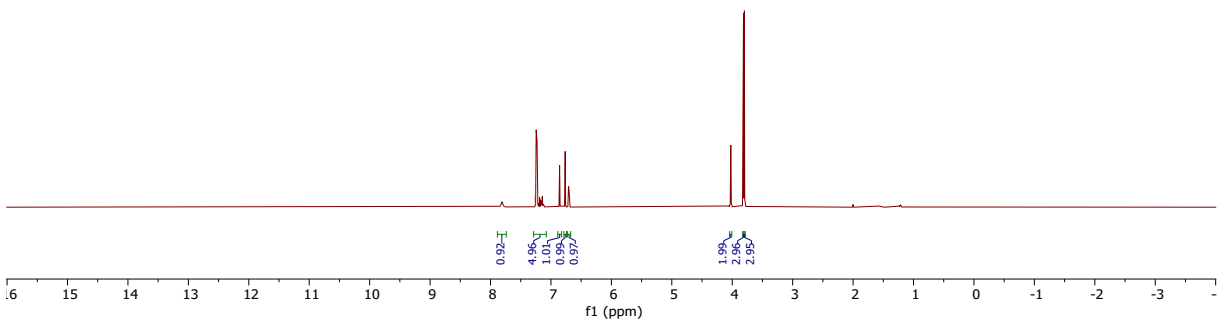



210804.330.11.fid  
Bei Zhou Bei 21-118  
Au13C CDCl3 {C:\Bruker\TopSpin3.6.2} 2108 30

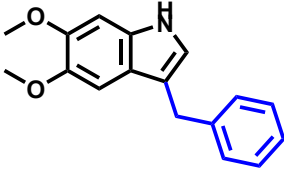

147.07  
144.81  
141.27  
130.75  
128.71  
128.67  
128.62  
121.02  
120.30  
115.52  
100.97  
94.66  
77.54 CDCl3  
77.01 CDCl3  
76.69 CDCl3

56.38  
56.20

31.76

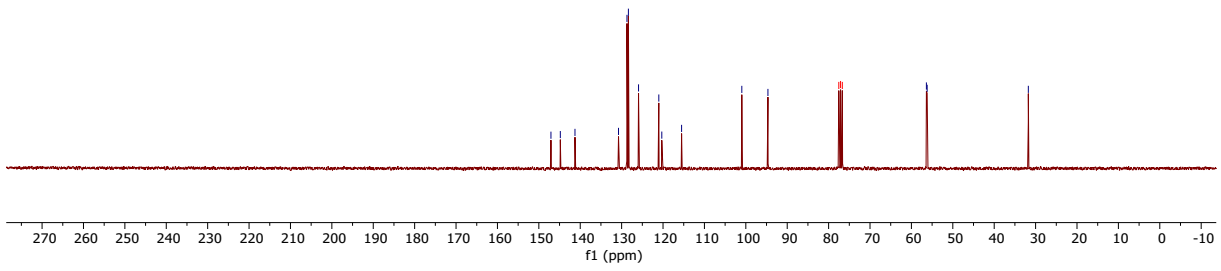

Supplement: d2gc00469k1.pdf [file d2gc00469k1.pdf]
